# Supplementary material
Source: PubMed Central journal article supplement (PMC9887520)
Supplement: NIHMS1865371-supplement-Suppplementary_Info.pdf [file NIHMS1865371-supplement-Suppplementary_Info.pdf]

# Supplementary Information

## Contents

|                                                                                         |    |
|-----------------------------------------------------------------------------------------|----|
| Supplementary Table 1. Sample information .....                                         | 1  |
| Supplementary Table 2. Cerebellum cluster marker genes .....                            | 4  |
| Supplementary Table 3. DEGs of <i>Aldoc</i> + VS. <i>Plcb4</i> + Purkinje neurons ..... | 34 |
| Supplementary Table 4. Module significant genes .....                                   | 45 |
| Supplementary Table 5. Primer sets used in genomic DNA PCR .....                        | 49 |
| Supplementary Table 6. Primer sets used in qPCR .....                                   | 50 |
| Supplementary Video. Associative learning .....                                         | 51 |

## Supplementary Table 1. Sample information

| No. | Behavior paradigm                  | Learning Status | Age (week) | Sex | Genetic background | Brain region for sequencing | Raw nuclei number | Filtered nuclei number | Median genes per nucleus | Nuclei number of Purkinje neuron | Median genes per Purkinje nucleus | Nuclei number of Granule neuron | Nuclei number of Interneuron | Nuclei number of Glial cell | Nuclei number of Oligodendrocyte |
|-----|------------------------------------|-----------------|------------|-----|--------------------|-----------------------------|-------------------|------------------------|--------------------------|----------------------------------|-----------------------------------|---------------------------------|------------------------------|-----------------------------|----------------------------------|
| 1   | Activity_Replicate1                | Baseline        | 5-7        | M   | BU/6J              | Whole cerebellum            | 13090             | 12625                  | 1075                     | 4968                             | 3114                              | 6736                            | 241                          | 320                         | 360                              |
| 2   | Activity_Replicate1                | Activity        | 5-7        | M   | BU/6J              | Whole cerebellum            | 12166             | 10972                  | 977                      | 3688                             | 3139                              | 6478                            | 311                          | 210                         | 285                              |
| 3   | Motor learning_Replicate1          | Baseline        | 5-7        | M   | BU/6J              | Whole cerebellum            | 5409              | 5006                   | 1247                     | 896                              | 4741                              | 3625                            | 215                          | 107                         | 163                              |
| 4   | Motor learning_Replicate1          | Learning        | 5-7        | M   | BU/6J              | Whole cerebellum            | 8025              | 7567                   | 1044                     | 1473                             | 4240                              | 5479                            | 263                          | 155                         | 197                              |
| 5   | Motor learning_Replicate1          | Learned         | 5-7        | M   | BU/6J              | Whole cerebellum            | 8149              | 7532                   | 1013                     | 2197                             | 3910                              | 4733                            | 263                          | 155                         | 184                              |
| 6   | Associative learning_Replicate1    | Baseline        | 5-7        | M   | BU/6J              | Anterior Vermis             | 8333              | 8233                   | 907                      | 3547                             | 3029                              | 3931                            | 320                          | 200                         | 235                              |
| 7   | Associative learning_Replicate1    | Learning        | 5-7        | M   | BU/6J              | Anterior Vermis             | 5956              | 5751                   | 788                      | 1103                             | 3034                              | 3768                            | 467                          | 197                         | 216                              |
| 8   | Associative learning_Replicate1    | Learned         | 5-7        | M   | BU/6J              | Anterior Vermis             | 6431              | 6177                   | 716                      | 1407                             | 3008                              | 4246                            | 242                          | 145                         | 137                              |
| 9   | Activity_Replicate2                | Baseline        | 5-7        | M   | BU/6J              | Whole cerebellum            | 7512              | 7051                   | 1087                     | 1410                             | 3785                              | 4501                            | 484                          | 208                         | 448                              |
| 10  | Activity_Replicate2                | Activity        | 5-7        | M   | BU/6J              | Whole cerebellum            | 9147              | 8853                   | 849                      | 1384                             | 3901                              | 6786                            | 327                          | 49                          | 307                              |
| 11  | Motor learning_Replicate2          | Baseline        | 5-7        | M   | BU/6J              | Whole cerebellum            | 11106             | 9654                   | 1615                     | 5205                             | 3148                              | 3777                            | 256                          | 211                         | 205                              |
| 12  | Motor learning_Replicate2          | Learning        | 5-7        | M   | BU/6J              | Whole cerebellum            | 8708              | 8105                   | 849                      | 2273                             | 3194                              | 4990                            | 431                          | 209                         | 202                              |
| 13  | Motor learning_Replicate2          | Learned         | 5-7        | M   | BU/6J              | Whole cerebellum            | 10531             | 9176                   | 841                      | 4141                             | 2812                              | 4270                            | 284                          | 242                         | 239                              |
| 14  | Associative learning_Replicate2    | Baseline        | 5-7        | M   | BU/6J              | Anterior Vermis             | 10276             | 9918                   | 2889                     | 6826                             | 3159                              | 2630                            | 148                          | 80                          | 234                              |
| 15  | Associative learning_Replicate2    | Learning        | 5-7        | M   | BU/6J              | Anterior Vermis             | 8574              | 8381                   | 902                      | 1379                             | 3511                              | 5494                            | 1306                         | 55                          | 147                              |
| 16  | Associative learning_Replicate2    | Learned         | 5-7        | M   | BU/6J              | Anterior Vermis             | 10382             | 10055                  | 2879                     | 6699                             | 3199                              | 2762                            | 246                          | 79                          | 269                              |
| 17  | Motor learning_Scramble            | Baseline        | 5-7        | M   | BU/6J              | Anterior Vermis             | 15452             | 14005                  | 849                      | 1562                             | 4513                              | 10242                           | 1782                         | 156                         | 263                              |
| 18  | Motor learning_Scramble            | Learned         | 5-7        | M   | BU/6J              | Anterior Vermis             | 15636             | 13718                  | 962                      | 1051                             | 4888                              | 10231                           | 1748                         | 284                         | 404                              |
| 19  | Motor learning_Fgfr2 KO_Replicate1 | Baseline        | 5-7        | M   | BU/6J              | Anterior Vermis             | 16560             | 14455                  | 944                      | 1214                             | 3883                              | 10792                           | 2037                         | 146                         | 266                              |
| 20  | Motor learning_Fgfr2 KO_Replicate1 | Learned         | 5-7        | M   | BU/6J              | Anterior Vermis             | 15406             | 13455                  | 910                      | 939                              | 3862                              | 9989                            | 1940                         | 168                         | 419                              |
| 21  | Motor learning_Fgfr2 KO_Replicate2 | Baseline        | 5-7        | M   | BU/6J              | Anterior Vermis             | 13878             | 13673                  | 971                      | 1943                             | 2206                              | 9727                            | 1699                         | 134                         | 170                              |
| 22  | Motor learning_Fgfr2 KO_Replicate2 | Learned         | 5-7        | M   | BU/6J              | Anterior Vermis             | 15544             | 15331                  | 887                      | 1968                             | 4269                              | 10542                           | 2473                         | 108                         | 240                              |

**Figure 1, Extended Data Figure 1-2**

| <b>Baseline (Whole and Anterior Vermis adult mouse cerebellum)</b> |                                                              |
|--------------------------------------------------------------------|--------------------------------------------------------------|
| Fig1b                                                              | Activity_Replicate1 (Baseline, Whole )                       |
|                                                                    | Activity_Replicate2 (Baseline, Whole )                       |
|                                                                    | Motor learning_Replicate1 (Baseline, Whole )                 |
|                                                                    | Motor learning_Replicate2 (Baseline, Whole )                 |
| Fig1c<br>sFig1k-n<br>sFig1o                                        | Activity_Replicate1 (Baseline, Whole )                       |
|                                                                    | Activity_Replicate2 (Baseline, Whole )                       |
|                                                                    | Motor learning_Replicate1 (Baseline, Whole )                 |
|                                                                    | Motor learning_Replicate2 (Baseline, Whole )                 |
|                                                                    | Associative learning_Replicate1 (Baseline, Anterior Vermis ) |
|                                                                    | Associative learning_Replicate2 (Baseline, Anterior Vermis ) |
| sFig1j                                                             | Associative learning_Replicate1 (Baseline, Anterior Vermis ) |
|                                                                    | Associative learning_Replicate2 (Baseline, Anterior Vermis ) |

| <b>Baseline (Whole and Anterior Vermis Purkinje neuron)</b> |                                                              |
|-------------------------------------------------------------|--------------------------------------------------------------|
| Fig1d, g<br>sFig2a-d, g                                     | Activity_Replicate1 (Baseline, Whole )                       |
|                                                             | Activity_Replicate2 (Baseline, Whole )                       |
|                                                             | Motor learning_Replicate1 (Baseline, Whole )                 |
|                                                             | Motor learning_Replicate2 (Baseline, Whole )                 |
|                                                             | Associative learning_Replicate1 (Baseline, Anterior Vermis ) |
|                                                             | Associative learning_Replicate2 (Baseline, Anterior Vermis ) |
| Fig1e                                                       | Activity_Replicate1 (Baseline, Whole )                       |
|                                                             | Activity_Replicate2 (Baseline, Whole )                       |
|                                                             | Motor learning_Replicate1 (Baseline, Whole )                 |
|                                                             | Motor learning_Replicate2 (Baseline, Whole )                 |
| sFig2f                                                      | Associative learning_Replicate1 (Baseline, Anterior Vermis ) |
|                                                             | Associative learning_Replicate2 (Baseline, Anterior Vermis ) |

**Figure 2, Extended Data Figure 5-7**

| <b>Three paradigms (Whole and Anterior Vermis <i>P1cb4+</i> subpopulation)</b> |                                                               |
|--------------------------------------------------------------------------------|---------------------------------------------------------------|
| Fig2a-f<br>sFig5f-m                                                            | Activity_Replicate1 (Baseline, Activity)                      |
|                                                                                | Activity_Replicate2 (Baseline, Activity)                      |
|                                                                                | Motor learning_Replicate1 (Baseline, Learning, Learned)       |
|                                                                                | Motor learning_Replicate2 (Baseline, Learning, Learned)       |
|                                                                                | Associative learning_Replicate1 (Baseline, Learning, Learned) |
|                                                                                | Associative learning_Replicate2 (Baseline, Learning, Learned) |

| <b>Three paradigms (Whole and Anterior Vermis <i>Aldoc+</i> subpopulation)</b> |                                                               |
|--------------------------------------------------------------------------------|---------------------------------------------------------------|
| Fig2g-i<br>sFig6a-g                                                            | Activity_Replicate1 (Baseline, Activity)                      |
|                                                                                | Activity_Replicate2 (Baseline, Activity)                      |
|                                                                                | Motor learning_Replicate1 (Baseline, Learning, Learned)       |
|                                                                                | Motor learning_Replicate2 (Baseline, Learning, Learned)       |
|                                                                                | Associative learning_Replicate1 (Baseline, Learning, Learned) |
|                                                                                | Associative learning_Replicate2 (Baseline, Learning, Learned) |

| <b>Three paradigms (Whole and Anterior Vermis Purkinje neuron)</b> |                                                               |
|--------------------------------------------------------------------|---------------------------------------------------------------|
| Fig2j<br>sFig6h<br>sFig7a-e                                        | Activity_Replicate1 (Baseline, Activity)                      |
|                                                                    | Activity_Replicate2 (Baseline, Activity)                      |
|                                                                    | Motor learning_Replicate1 (Baseline, Learning, Learned)       |
|                                                                    | Motor learning_Replicate2 (Baseline, Learning, Learned)       |
|                                                                    | Associative learning_Replicate1 (Baseline, Learning, Learned) |
|                                                                    | Associative learning_Replicate2 (Baseline, Learning, Learned) |

**Figure 4, Extended Data Figure 9-10**

| <b>Three paradigms (Whole and Anterior Vermis Purkinje neuron)</b> |                                                               |
|--------------------------------------------------------------------|---------------------------------------------------------------|
| Fig4a-b<br>sFig9a-b, e-f                                           | Activity_Replicate1 (Baseline, Activity)                      |
|                                                                    | Activity_Replicate2 (Baseline, Activity)                      |
|                                                                    | Motor learning_Replicate1 (Baseline, Learning, Learned)       |
|                                                                    | Motor learning_Replicate2 (Baseline, Learning, Learned)       |
|                                                                    | Associative learning_Replicate1 (Baseline, Learning, Learned) |
|                                                                    | Associative learning_Replicate2 (Baseline, Learning, Learned) |

| <b>Motor learning (Anterior Vermis)</b> |                                                                 |
|-----------------------------------------|-----------------------------------------------------------------|
| Fig4j, m<br>sFig10i-k, m                | Motor learning_Scramble (Baseline, Learned)                     |
|                                         | Motor learning_ <i>Fgfr2</i> _KO_Replicate1 (Baseline, Learned) |
|                                         | Motor learning_ <i>Fgfr2</i> _KO_Replicate2 (Baseline, Learned) |

| <b>Motor learning (Anterior Vermis)</b> |                                                       |
|-----------------------------------------|-------------------------------------------------------|
| sFig10l                                 | Motor learning_Scramble (Learned)                     |
|                                         | Motor learning_ <i>Fgfr2</i> _KO_Replicate1 (Learned) |
|                                         | Motor learning_ <i>Fgfr2</i> _KO_Replicate2 (Learned) |

**Supplementary Table 2.**  
**Cerebellum cluster marker genes**

| Gene    | p_val    | avg_logFC | pct.1 | pct.2 | p_val_adj | Cluster        |
|---------|----------|-----------|-------|-------|-----------|----------------|
| Kcnd2   | 0.00E+00 | 2.559     | 0.999 | 0.254 | 0.00E+00  | Granule neuron |
| Kcnip4  | 0.00E+00 | 2.199     | 0.997 | 0.805 | 0.00E+00  | Granule neuron |
| Raly1   | 0.00E+00 | 1.935     | 0.964 | 0.107 | 0.00E+00  | Granule neuron |
| Nrxn1   | 0.00E+00 | 1.884     | 1.000 | 0.176 | 0.00E+00  | Granule neuron |
| Grik2   | 0.00E+00 | 1.816     | 0.964 | 0.078 | 0.00E+00  | Granule neuron |
| Tenm1   | 0.00E+00 | 1.584     | 0.929 | 0.054 | 0.00E+00  | Granule neuron |
| Rims1   | 0.00E+00 | 1.458     | 0.907 | 0.074 | 0.00E+00  | Granule neuron |
| Negr1   | 0.00E+00 | 1.451     | 0.927 | 0.154 | 0.00E+00  | Granule neuron |
| Rbfox1  | 0.00E+00 | 1.419     | 0.997 | 0.753 | 0.00E+00  | Granule neuron |
| Ctnna3  | 0.00E+00 | 1.386     | 0.867 | 0.106 | 0.00E+00  | Granule neuron |
| Car10   | 0.00E+00 | 1.310     | 0.878 | 0.078 | 0.00E+00  | Granule neuron |
| Olfm3   | 0.00E+00 | 1.283     | 0.818 | 0.057 | 0.00E+00  | Granule neuron |
| Rims2   | 0.00E+00 | 1.239     | 0.868 | 0.203 | 0.00E+00  | Granule neuron |
| Cadm2   | 0.00E+00 | 1.211     | 0.987 | 0.538 | 0.00E+00  | Granule neuron |
| Cadps2  | 0.00E+00 | 1.132     | 0.766 | 0.033 | 0.00E+00  | Granule neuron |
| Dpp6    | 0.00E+00 | 1.117     | 0.774 | 0.143 | 0.00E+00  | Granule neuron |
| Fgf14   | 0.00E+00 | 1.117     | 1.000 | 0.967 | 0.00E+00  | Granule neuron |
| Galnt13 | 0.00E+00 | 1.112     | 0.914 | 0.451 | 0.00E+00  | Granule neuron |
| Syt1    | 0.00E+00 | 1.094     | 0.751 | 0.078 | 0.00E+00  | Granule neuron |
| Syne1   | 0.00E+00 | 1.049     | 0.835 | 0.269 | 0.00E+00  | Granule neuron |
| Unc13c  | 0.00E+00 | 1.048     | 0.785 | 0.084 | 0.00E+00  | Granule neuron |
| Mctp1   | 0.00E+00 | 1.020     | 0.742 | 0.093 | 0.00E+00  | Granule neuron |
| Kirrel3 | 0.00E+00 | 0.988     | 0.821 | 0.205 | 0.00E+00  | Granule neuron |
| Snap25  | 0.00E+00 | 0.954     | 0.760 | 0.195 | 0.00E+00  | Granule neuron |
| Chn2    | 0.00E+00 | 0.945     | 0.700 | 0.034 | 0.00E+00  | Granule neuron |
| Pde4d   | 0.00E+00 | 0.940     | 0.866 | 0.455 | 0.00E+00  | Granule neuron |
| Lrrc4c  | 0.00E+00 | 0.916     | 0.826 | 0.319 | 0.00E+00  | Granule neuron |
| Dlgap1  | 0.00E+00 | 0.915     | 0.895 | 0.448 | 0.00E+00  | Granule neuron |
| Gm42418 | 0.00E+00 | 0.912     | 0.865 | 0.305 | 0.00E+00  | Granule neuron |
| Camk4   | 0.00E+00 | 0.893     | 0.671 | 0.124 | 0.00E+00  | Granule neuron |
| Stxbp5l | 0.00E+00 | 0.887     | 0.707 | 0.113 | 0.00E+00  | Granule neuron |
| Trhde   | 0.00E+00 | 0.876     | 0.626 | 0.028 | 0.00E+00  | Granule neuron |
| Pclo    | 0.00E+00 | 0.842     | 0.705 | 0.205 | 0.00E+00  | Granule neuron |
| Pde4b   | 0.00E+00 | 0.812     | 0.744 | 0.109 | 0.00E+00  | Granule neuron |
| Trpm3   | 0.00E+00 | 0.791     | 0.750 | 0.107 | 0.00E+00  | Granule neuron |
| Lrrtm3  | 0.00E+00 | 0.791     | 0.619 | 0.075 | 0.00E+00  | Granule neuron |
| Itm2b   | 0.00E+00 | 0.791     | 0.809 | 0.352 | 0.00E+00  | Granule neuron |
| Cntnap2 | 0.00E+00 | 0.731     | 0.970 | 0.730 | 0.00E+00  | Granule neuron |
| Cntn6   | 0.00E+00 | 0.725     | 0.662 | 0.259 | 0.00E+00  | Granule neuron |
| Oxr1    | 0.00E+00 | 0.715     | 0.644 | 0.212 | 0.00E+00  | Granule neuron |
| Etv1    | 0.00E+00 | 0.706     | 0.548 | 0.026 | 0.00E+00  | Granule neuron |
| Gabra6  | 0.00E+00 | 0.705     | 0.580 | 0.025 | 0.00E+00  | Granule neuron |

|               |          |       |       |       |          |                |
|---------------|----------|-------|-------|-------|----------|----------------|
| Ddx5          | 0.00E+00 | 0.702 | 0.666 | 0.189 | 0.00E+00 | Granule neuron |
| Rbfox3        | 0.00E+00 | 0.699 | 0.554 | 0.025 | 0.00E+00 | Granule neuron |
| Sphkap        | 0.00E+00 | 0.693 | 0.710 | 0.393 | 0.00E+00 | Granule neuron |
| Gpr158        | 0.00E+00 | 0.692 | 0.636 | 0.152 | 0.00E+00 | Granule neuron |
| Gria4         | 0.00E+00 | 0.686 | 0.821 | 0.128 | 0.00E+00 | Granule neuron |
| Tcf4          | 0.00E+00 | 0.685 | 0.672 | 0.121 | 0.00E+00 | Granule neuron |
| Scn2a         | 0.00E+00 | 0.684 | 0.597 | 0.116 | 0.00E+00 | Granule neuron |
| Ppp3ca        | 0.00E+00 | 0.676 | 0.712 | 0.393 | 0.00E+00 | Granule neuron |
| Ndst3         | 0.00E+00 | 0.663 | 0.543 | 0.032 | 0.00E+00 | Granule neuron |
| Reln          | 0.00E+00 | 0.656 | 0.532 | 0.020 | 0.00E+00 | Granule neuron |
| Kctd8         | 0.00E+00 | 0.650 | 0.541 | 0.080 | 0.00E+00 | Granule neuron |
| Ptprd         | 0.00E+00 | 0.633 | 0.707 | 0.132 | 0.00E+00 | Granule neuron |
| Gm20388       | 0.00E+00 | 0.619 | 0.741 | 0.445 | 0.00E+00 | Granule neuron |
| Dock4         | 0.00E+00 | 0.613 | 0.547 | 0.063 | 0.00E+00 | Granule neuron |
| Ank3          | 0.00E+00 | 0.612 | 0.679 | 0.331 | 0.00E+00 | Granule neuron |
| Ccser1        | 0.00E+00 | 0.608 | 0.698 | 0.449 | 0.00E+00 | Granule neuron |
| Chgb          | 0.00E+00 | 0.606 | 0.530 | 0.069 | 0.00E+00 | Granule neuron |
| Caln1         | 0.00E+00 | 0.597 | 0.602 | 0.291 | 0.00E+00 | Granule neuron |
| Cacna2d1      | 0.00E+00 | 0.578 | 0.489 | 0.029 | 0.00E+00 | Granule neuron |
| Msra          | 0.00E+00 | 0.575 | 0.494 | 0.049 | 0.00E+00 | Granule neuron |
| Nfib          | 0.00E+00 | 0.575 | 0.548 | 0.088 | 0.00E+00 | Granule neuron |
| Tmem108       | 0.00E+00 | 0.566 | 0.509 | 0.044 | 0.00E+00 | Granule neuron |
| Gpm6a         | 0.00E+00 | 0.551 | 0.573 | 0.184 | 0.00E+00 | Granule neuron |
| A230057D06Rik | 0.00E+00 | 0.547 | 0.577 | 0.237 | 0.00E+00 | Granule neuron |
| Strbp         | 0.00E+00 | 0.545 | 0.675 | 0.410 | 0.00E+00 | Granule neuron |
| Fut8          | 0.00E+00 | 0.544 | 0.564 | 0.227 | 0.00E+00 | Granule neuron |
| Specc1        | 0.00E+00 | 0.541 | 0.508 | 0.064 | 0.00E+00 | Granule neuron |
| Lin7a         | 0.00E+00 | 0.539 | 0.457 | 0.039 | 0.00E+00 | Granule neuron |
| Cacna1e       | 0.00E+00 | 0.539 | 0.463 | 0.026 | 0.00E+00 | Granule neuron |
| Tmem163       | 0.00E+00 | 0.537 | 0.450 | 0.028 | 0.00E+00 | Granule neuron |
| Zfpm2         | 0.00E+00 | 0.537 | 0.624 | 0.277 | 0.00E+00 | Granule neuron |
| Lhfp          | 0.00E+00 | 0.527 | 0.487 | 0.097 | 0.00E+00 | Granule neuron |
| Nav2          | 0.00E+00 | 0.525 | 0.500 | 0.108 | 0.00E+00 | Granule neuron |
| Mycbp2        | 0.00E+00 | 0.523 | 0.659 | 0.372 | 0.00E+00 | Granule neuron |
| Rapgef4       | 0.00E+00 | 0.523 | 0.476 | 0.051 | 0.00E+00 | Granule neuron |
| Lsamp         | 0.00E+00 | 0.517 | 0.992 | 0.657 | 0.00E+00 | Granule neuron |
| Plcx3         | 0.00E+00 | 0.512 | 0.439 | 0.082 | 0.00E+00 | Granule neuron |
| Sh3gl2        | 0.00E+00 | 0.509 | 0.563 | 0.305 | 0.00E+00 | Granule neuron |
| Gm2694        | 0.00E+00 | 0.508 | 0.443 | 0.023 | 0.00E+00 | Granule neuron |
| Grin2a        | 0.00E+00 | 0.507 | 0.486 | 0.084 | 0.00E+00 | Granule neuron |
| Brinp1        | 0.00E+00 | 0.505 | 0.513 | 0.196 | 0.00E+00 | Granule neuron |
| Arpp21        | 0.00E+00 | 0.505 | 0.450 | 0.035 | 0.00E+00 | Granule neuron |
| Gphn          | 0.00E+00 | 0.502 | 0.733 | 0.600 | 0.00E+00 | Granule neuron |
| Cnksr2        | 0.00E+00 | 0.500 | 0.575 | 0.340 | 0.00E+00 | Granule neuron |

|          |          |       |       |       |          |                |
|----------|----------|-------|-------|-------|----------|----------------|
| Epb41    | 0.00E+00 | 0.494 | 0.533 | 0.221 | 0.00E+00 | Granule neuron |
| Gm26848  | 0.00E+00 | 0.490 | 0.569 | 0.318 | 0.00E+00 | Granule neuron |
| Ctnna2   | 0.00E+00 | 0.489 | 0.654 | 0.517 | 0.00E+00 | Granule neuron |
| Rabgap1l | 0.00E+00 | 0.483 | 0.461 | 0.081 | 0.00E+00 | Granule neuron |
| Ryr2     | 0.00E+00 | 0.481 | 0.507 | 0.173 | 0.00E+00 | Granule neuron |
| Pde10a   | 0.00E+00 | 0.470 | 0.573 | 0.330 | 0.00E+00 | Granule neuron |
| Erc1     | 0.00E+00 | 0.470 | 0.444 | 0.083 | 0.00E+00 | Granule neuron |
| Nrxn3    | 0.00E+00 | 0.470 | 0.999 | 0.969 | 0.00E+00 | Granule neuron |
| Cdh8     | 0.00E+00 | 0.461 | 0.438 | 0.099 | 0.00E+00 | Granule neuron |
| Nedd4l   | 0.00E+00 | 0.454 | 0.413 | 0.032 | 0.00E+00 | Granule neuron |
| Nsg1     | 0.00E+00 | 0.452 | 0.558 | 0.277 | 0.00E+00 | Granule neuron |
| Gm28376  | 0.00E+00 | 0.451 | 0.509 | 0.232 | 0.00E+00 | Granule neuron |
| Hivep2   | 0.00E+00 | 0.451 | 0.522 | 0.262 | 0.00E+00 | Granule neuron |
| Pld5     | 0.00E+00 | 0.450 | 0.426 | 0.048 | 0.00E+00 | Granule neuron |
| Kcnj3    | 0.00E+00 | 0.445 | 0.527 | 0.280 | 0.00E+00 | Granule neuron |
| Smg1     | 0.00E+00 | 0.442 | 0.463 | 0.131 | 0.00E+00 | Granule neuron |
| Nfia     | 0.00E+00 | 0.438 | 0.475 | 0.112 | 0.00E+00 | Granule neuron |
| Otud7a   | 0.00E+00 | 0.437 | 0.487 | 0.240 | 0.00E+00 | Granule neuron |
| ErbB4    | 0.00E+00 | 0.427 | 0.397 | 0.088 | 0.00E+00 | Granule neuron |
| Camk2d   | 0.00E+00 | 0.426 | 0.545 | 0.251 | 0.00E+00 | Granule neuron |
| Fnbp1    | 0.00E+00 | 0.419 | 0.464 | 0.087 | 0.00E+00 | Granule neuron |
| Atp1a1   | 0.00E+00 | 0.414 | 0.398 | 0.060 | 0.00E+00 | Granule neuron |
| Cacna1c  | 0.00E+00 | 0.412 | 0.387 | 0.052 | 0.00E+00 | Granule neuron |
| Fgf12    | 0.00E+00 | 0.412 | 0.721 | 0.659 | 0.00E+00 | Granule neuron |
| Pcsk2    | 0.00E+00 | 0.410 | 0.373 | 0.052 | 0.00E+00 | Granule neuron |
| Mmp24    | 0.00E+00 | 0.409 | 0.468 | 0.188 | 0.00E+00 | Granule neuron |
| Foxn3    | 0.00E+00 | 0.396 | 0.470 | 0.184 | 0.00E+00 | Granule neuron |
| Ntrk3    | 0.00E+00 | 0.394 | 0.480 | 0.276 | 0.00E+00 | Granule neuron |
| Stag1    | 0.00E+00 | 0.389 | 0.499 | 0.273 | 0.00E+00 | Granule neuron |
| Celf4    | 0.00E+00 | 0.381 | 0.357 | 0.032 | 0.00E+00 | Granule neuron |
| Atp6v0b  | 0.00E+00 | 0.381 | 0.535 | 0.294 | 0.00E+00 | Granule neuron |
| Ablim1   | 0.00E+00 | 0.377 | 0.433 | 0.179 | 0.00E+00 | Granule neuron |
| Ahi1     | 0.00E+00 | 0.376 | 0.521 | 0.300 | 0.00E+00 | Granule neuron |
| Son      | 0.00E+00 | 0.369 | 0.609 | 0.419 | 0.00E+00 | Granule neuron |
| Zfp521   | 0.00E+00 | 0.360 | 0.367 | 0.054 | 0.00E+00 | Granule neuron |
| Srrm4    | 0.00E+00 | 0.352 | 0.343 | 0.044 | 0.00E+00 | Granule neuron |
| CsmD3    | 0.00E+00 | 0.352 | 0.430 | 0.141 | 0.00E+00 | Granule neuron |
| Zbtb20   | 0.00E+00 | 0.352 | 0.549 | 0.277 | 0.00E+00 | Granule neuron |
| Chd7     | 0.00E+00 | 0.349 | 0.376 | 0.092 | 0.00E+00 | Granule neuron |
| PtpRt    | 0.00E+00 | 0.349 | 0.295 | 0.043 | 0.00E+00 | Granule neuron |
| Kcnc1    | 0.00E+00 | 0.349 | 0.367 | 0.075 | 0.00E+00 | Granule neuron |
| Cnpy1    | 0.00E+00 | 0.348 | 0.361 | 0.053 | 0.00E+00 | Granule neuron |
| Fut9     | 0.00E+00 | 0.342 | 0.429 | 0.198 | 0.00E+00 | Granule neuron |
| Gm42912  | 0.00E+00 | 0.335 | 0.299 | 0.007 | 0.00E+00 | Granule neuron |

|          |           |       |       |       |           |                |
|----------|-----------|-------|-------|-------|-----------|----------------|
| Cmss1    | 0.00E+00  | 0.334 | 0.438 | 0.203 | 0.00E+00  | Granule neuron |
| Selenom  | 0.00E+00  | 0.333 | 0.409 | 0.162 | 0.00E+00  | Granule neuron |
| Ndr3     | 0.00E+00  | 0.327 | 0.361 | 0.099 | 0.00E+00  | Granule neuron |
| Slc4a4   | 0.00E+00  | 0.326 | 0.431 | 0.059 | 0.00E+00  | Granule neuron |
| Megf11   | 0.00E+00  | 0.325 | 0.312 | 0.030 | 0.00E+00  | Granule neuron |
| Pkib     | 0.00E+00  | 0.325 | 0.315 | 0.036 | 0.00E+00  | Granule neuron |
| H3f3b    | 0.00E+00  | 0.325 | 0.378 | 0.117 | 0.00E+00  | Granule neuron |
| Tll1     | 0.00E+00  | 0.325 | 0.285 | 0.014 | 0.00E+00  | Granule neuron |
| Il16     | 0.00E+00  | 0.324 | 0.296 | 0.018 | 0.00E+00  | Granule neuron |
| Gabrd    | 0.00E+00  | 0.324 | 0.313 | 0.025 | 0.00E+00  | Granule neuron |
| Cdh7     | 0.00E+00  | 0.324 | 0.300 | 0.024 | 0.00E+00  | Granule neuron |
| Zic1     | 0.00E+00  | 0.320 | 0.312 | 0.029 | 0.00E+00  | Granule neuron |
| Tmem178  | 0.00E+00  | 0.319 | 0.318 | 0.033 | 0.00E+00  | Granule neuron |
| Fat2     | 0.00E+00  | 0.315 | 0.293 | 0.009 | 0.00E+00  | Granule neuron |
| Slit3    | 0.00E+00  | 0.313 | 0.274 | 0.010 | 0.00E+00  | Granule neuron |
| Chl1     | 0.00E+00  | 0.312 | 0.311 | 0.041 | 0.00E+00  | Granule neuron |
| Prkce    | 0.00E+00  | 0.312 | 0.319 | 0.046 | 0.00E+00  | Granule neuron |
| Bsg      | 0.00E+00  | 0.307 | 0.395 | 0.161 | 0.00E+00  | Granule neuron |
| Usp3     | 0.00E+00  | 0.302 | 0.358 | 0.133 | 0.00E+00  | Granule neuron |
| Kcnk10   | 0.00E+00  | 0.300 | 0.277 | 0.014 | 0.00E+00  | Granule neuron |
| Fstl5    | 0.00E+00  | 0.298 | 0.272 | 0.038 | 0.00E+00  | Granule neuron |
| Prune2   | 0.00E+00  | 0.294 | 0.286 | 0.028 | 0.00E+00  | Granule neuron |
| Gm36975  | 0.00E+00  | 0.292 | 0.283 | 0.043 | 0.00E+00  | Granule neuron |
| Rtn3     | 0.00E+00  | 0.288 | 0.317 | 0.062 | 0.00E+00  | Granule neuron |
| Inpp4b   | 0.00E+00  | 0.285 | 0.407 | 0.080 | 0.00E+00  | Granule neuron |
| Sv2b     | 0.00E+00  | 0.285 | 0.265 | 0.010 | 0.00E+00  | Granule neuron |
| Dlg1     | 0.00E+00  | 0.285 | 0.313 | 0.059 | 0.00E+00  | Granule neuron |
| Atp2b3   | 0.00E+00  | 0.284 | 0.274 | 0.021 | 0.00E+00  | Granule neuron |
| Adamts18 | 0.00E+00  | 0.283 | 0.260 | 0.017 | 0.00E+00  | Granule neuron |
| Patj     | 0.00E+00  | 0.283 | 0.318 | 0.106 | 0.00E+00  | Granule neuron |
| Kcnj6    | 0.00E+00  | 0.277 | 0.255 | 0.014 | 0.00E+00  | Granule neuron |
| Vsnl1    | 0.00E+00  | 0.274 | 0.258 | 0.019 | 0.00E+00  | Granule neuron |
| Prkcb    | 0.00E+00  | 0.272 | 0.329 | 0.084 | 0.00E+00  | Granule neuron |
| Cnr1     | 0.00E+00  | 0.270 | 0.277 | 0.041 | 0.00E+00  | Granule neuron |
| Slc16a11 | 0.00E+00  | 0.267 | 0.261 | 0.028 | 0.00E+00  | Granule neuron |
| Ablim3   | 0.00E+00  | 0.263 | 0.304 | 0.085 | 0.00E+00  | Granule neuron |
| Maml2    | 0.00E+00  | 0.262 | 0.278 | 0.049 | 0.00E+00  | Granule neuron |
| Nrxn2    | 0.00E+00  | 0.261 | 0.298 | 0.078 | 0.00E+00  | Granule neuron |
| Btg1     | 0.00E+00  | 0.258 | 0.251 | 0.019 | 0.00E+00  | Granule neuron |
| Stmn2    | 1.80E-302 | 0.330 | 0.405 | 0.193 | 3.93E-298 | Granule neuron |
| Syn2     | 3.47E-299 | 0.287 | 0.382 | 0.162 | 7.59E-295 | Granule neuron |
| Chd9     | 1.06E-285 | 0.371 | 0.524 | 0.353 | 2.31E-281 | Granule neuron |
| Wscd2    | 6.70E-284 | 0.257 | 0.311 | 0.115 | 1.46E-279 | Granule neuron |
| Il1rap1  | 2.07E-274 | 0.298 | 0.949 | 0.841 | 4.53E-270 | Granule neuron |



|               |           |       |       |       |           |                 |
|---------------|-----------|-------|-------|-------|-----------|-----------------|
| Pcca          | 6.92E-274 | 0.341 | 0.434 | 0.240 | 1.51E-269 | Granule neuron  |
| Adcy1         | 8.89E-269 | 0.264 | 0.334 | 0.139 | 1.94E-264 | Granule neuron  |
| Rif1          | 7.78E-266 | 0.279 | 0.346 | 0.152 | 1.70E-261 | Granule neuron  |
| Rtn1          | 1.24E-265 | 0.373 | 0.590 | 0.477 | 2.72E-261 | Granule neuron  |
| Gm15563       | 5.13E-260 | 0.268 | 0.325 | 0.135 | 1.12E-255 | Granule neuron  |
| Setbp1        | 1.97E-259 | 0.272 | 0.358 | 0.163 | 4.31E-255 | Granule neuron  |
| Gabrb2        | 1.19E-257 | 0.374 | 0.531 | 0.385 | 2.60E-253 | Granule neuron  |
| Immp1l        | 1.04E-255 | 0.268 | 0.355 | 0.161 | 2.27E-251 | Granule neuron  |
| Rbm39         | 2.26E-254 | 0.340 | 0.572 | 0.433 | 4.93E-250 | Granule neuron  |
| Ube3a         | 3.68E-249 | 0.258 | 0.908 | 0.838 | 8.04E-245 | Granule neuron  |
| Gls           | 1.56E-247 | 0.281 | 0.377 | 0.187 | 3.41E-243 | Granule neuron  |
| Dip2b         | 5.47E-244 | 0.258 | 0.358 | 0.164 | 1.19E-239 | Granule neuron  |
| Adam22        | 1.55E-243 | 0.324 | 0.447 | 0.267 | 3.38E-239 | Granule neuron  |
| Prpf4b        | 1.86E-243 | 0.358 | 0.548 | 0.404 | 4.07E-239 | Granule neuron  |
| Map2          | 7.79E-243 | 0.301 | 0.435 | 0.244 | 1.70E-238 | Granule neuron  |
| Aig1          | 1.69E-238 | 0.278 | 0.383 | 0.195 | 3.69E-234 | Granule neuron  |
| Gabrb3        | 9.28E-230 | 0.267 | 0.405 | 0.214 | 2.03E-225 | Granule neuron  |
| Unc5c         | 1.56E-229 | 0.303 | 0.619 | 0.507 | 3.42E-225 | Granule neuron  |
| Jmjd1c        | 2.25E-215 | 0.344 | 0.501 | 0.365 | 4.93E-211 | Granule neuron  |
| Zcchc11       | 7.94E-215 | 0.297 | 0.417 | 0.247 | 1.74E-210 | Granule neuron  |
| Dst           | 3.27E-208 | 0.310 | 0.479 | 0.325 | 7.15E-204 | Granule neuron  |
| Ttc3          | 1.72E-206 | 0.316 | 0.495 | 0.349 | 3.77E-202 | Granule neuron  |
| Zfp385b       | 1.28E-201 | 0.312 | 0.603 | 0.498 | 2.80E-197 | Granule neuron  |
| Bicd1         | 6.38E-200 | 0.289 | 0.420 | 0.257 | 1.39E-195 | Granule neuron  |
| Pan3          | 1.33E-198 | 0.283 | 0.393 | 0.227 | 2.91E-194 | Granule neuron  |
| Akt3          | 4.49E-185 | 0.281 | 0.427 | 0.270 | 9.81E-181 | Granule neuron  |
| Tnrc6c        | 5.10E-177 | 0.270 | 0.429 | 0.278 | 1.11E-172 | Granule neuron  |
| Ctnnd2        | 7.17E-170 | 0.260 | 0.630 | 0.576 | 1.57E-165 | Granule neuron  |
| Ncam1         | 2.39E-164 | 0.275 | 0.495 | 0.366 | 5.22E-160 | Granule neuron  |
| Ppfia2        | 6.20E-155 | 0.314 | 0.568 | 0.526 | 1.36E-150 | Granule neuron  |
| Snrnp70       | 8.58E-143 | 0.257 | 0.443 | 0.318 | 1.88E-138 | Granule neuron  |
| Cntn1         | 2.74E-135 | 0.267 | 0.462 | 0.350 | 5.98E-131 | Granule neuron  |
| Unc80         | 2.45E-127 | 0.284 | 0.520 | 0.461 | 5.35E-123 | Granule neuron  |
| Macf1         | 1.67E-121 | 0.264 | 0.629 | 0.663 | 3.65E-117 | Granule neuron  |
| AC149090.1    | 1.32E-106 | 0.256 | 0.464 | 0.383 | 2.89E-102 | Granule neuron  |
| C230004F18Rik | 3.40E-91  | 0.255 | 0.465 | 0.408 | 7.43E-87  | Granule neuron  |
| Prkg1         | 0.00E+00  | 2.180 | 1.000 | 0.825 | 0.00E+00  | Purkinje neuron |
| Frmpd4        | 0.00E+00  | 1.754 | 0.999 | 0.712 | 0.00E+00  | Purkinje neuron |
| Itpr1         | 0.00E+00  | 1.744 | 1.000 | 0.799 | 0.00E+00  | Purkinje neuron |
| Grid2         | 0.00E+00  | 1.587 | 1.000 | 0.990 | 0.00E+00  | Purkinje neuron |
| Cntnap5b      | 0.00E+00  | 1.561 | 0.984 | 0.163 | 0.00E+00  | Purkinje neuron |
| Etl4          | 0.00E+00  | 1.487 | 0.837 | 0.111 | 0.00E+00  | Purkinje neuron |
| Anks1b        | 0.00E+00  | 1.452 | 1.000 | 0.977 | 0.00E+00  | Purkinje neuron |
| Kcnma1        | 0.00E+00  | 1.431 | 0.995 | 0.489 | 0.00E+00  | Purkinje neuron |

|               |          |       |       |       |          |                 |
|---------------|----------|-------|-------|-------|----------|-----------------|
| Grm7          | 0.00E+00 | 1.421 | 0.994 | 0.228 | 0.00E+00 | Purkinje neuron |
| Car8          | 0.00E+00 | 1.338 | 0.988 | 0.334 | 0.00E+00 | Purkinje neuron |
| Cdh18         | 0.00E+00 | 1.320 | 1.000 | 0.918 | 0.00E+00 | Purkinje neuron |
| Dmd           | 0.00E+00 | 1.315 | 0.998 | 0.695 | 0.00E+00 | Purkinje neuron |
| Kcnip1        | 0.00E+00 | 1.306 | 0.929 | 0.087 | 0.00E+00 | Purkinje neuron |
| Shisa6        | 0.00E+00 | 1.279 | 0.985 | 0.115 | 0.00E+00 | Purkinje neuron |
| Ptpm          | 0.00E+00 | 1.263 | 0.975 | 0.087 | 0.00E+00 | Purkinje neuron |
| Arhgef33      | 0.00E+00 | 1.262 | 0.983 | 0.070 | 0.00E+00 | Purkinje neuron |
| Garnl3        | 0.00E+00 | 1.254 | 0.875 | 0.222 | 0.00E+00 | Purkinje neuron |
| Nell1         | 0.00E+00 | 1.235 | 0.953 | 0.059 | 0.00E+00 | Purkinje neuron |
| Dab1          | 0.00E+00 | 1.198 | 0.997 | 0.593 | 0.00E+00 | Purkinje neuron |
| Frmd4a        | 0.00E+00 | 1.189 | 0.991 | 0.313 | 0.00E+00 | Purkinje neuron |
| Large1        | 0.00E+00 | 1.156 | 0.979 | 0.337 | 0.00E+00 | Purkinje neuron |
| Tll5          | 0.00E+00 | 1.145 | 0.963 | 0.134 | 0.00E+00 | Purkinje neuron |
| Grik1         | 0.00E+00 | 1.139 | 0.956 | 0.080 | 0.00E+00 | Purkinje neuron |
| Grip1         | 0.00E+00 | 1.121 | 0.921 | 0.055 | 0.00E+00 | Purkinje neuron |
| Mdga2         | 0.00E+00 | 1.097 | 0.969 | 0.287 | 0.00E+00 | Purkinje neuron |
| Dpp10         | 0.00E+00 | 1.093 | 0.996 | 0.716 | 0.00E+00 | Purkinje neuron |
| Sgcz          | 0.00E+00 | 1.091 | 0.833 | 0.091 | 0.00E+00 | Purkinje neuron |
| Auts2         | 0.00E+00 | 1.083 | 1.000 | 0.975 | 0.00E+00 | Purkinje neuron |
| Shank2        | 0.00E+00 | 1.073 | 0.950 | 0.080 | 0.00E+00 | Purkinje neuron |
| Gria3         | 0.00E+00 | 1.047 | 0.976 | 0.152 | 0.00E+00 | Purkinje neuron |
| Cttnbp2       | 0.00E+00 | 1.029 | 0.928 | 0.106 | 0.00E+00 | Purkinje neuron |
| 9530059O14Rik | 0.00E+00 | 1.024 | 0.901 | 0.052 | 0.00E+00 | Purkinje neuron |
| Unc5d         | 0.00E+00 | 1.022 | 0.689 | 0.054 | 0.00E+00 | Purkinje neuron |
| Ptchd4        | 0.00E+00 | 1.011 | 0.973 | 0.300 | 0.00E+00 | Purkinje neuron |
| Syndig1       | 0.00E+00 | 1.005 | 0.902 | 0.157 | 0.00E+00 | Purkinje neuron |
| Lfn5          | 0.00E+00 | 0.993 | 0.873 | 0.081 | 0.00E+00 | Purkinje neuron |
| Cntn3         | 0.00E+00 | 0.970 | 0.800 | 0.083 | 0.00E+00 | Purkinje neuron |
| Dlg2          | 0.00E+00 | 0.960 | 1.000 | 0.942 | 0.00E+00 | Purkinje neuron |
| Paxbp1        | 0.00E+00 | 0.956 | 0.953 | 0.567 | 0.00E+00 | Purkinje neuron |
| Cntnap5c      | 0.00E+00 | 0.952 | 0.864 | 0.039 | 0.00E+00 | Purkinje neuron |
| Gm14033       | 0.00E+00 | 0.951 | 0.727 | 0.053 | 0.00E+00 | Purkinje neuron |
| Dner          | 0.00E+00 | 0.942 | 0.947 | 0.152 | 0.00E+00 | Purkinje neuron |
| Kalrn         | 0.00E+00 | 0.940 | 0.894 | 0.046 | 0.00E+00 | Purkinje neuron |
| Tenm2         | 0.00E+00 | 0.928 | 0.756 | 0.311 | 0.00E+00 | Purkinje neuron |
| Ebf1          | 0.00E+00 | 0.926 | 0.986 | 0.470 | 0.00E+00 | Purkinje neuron |
| Cacnb2        | 0.00E+00 | 0.925 | 0.913 | 0.111 | 0.00E+00 | Purkinje neuron |
| Dgkh          | 0.00E+00 | 0.917 | 0.647 | 0.083 | 0.00E+00 | Purkinje neuron |
| Gm35188       | 0.00E+00 | 0.911 | 0.943 | 0.450 | 0.00E+00 | Purkinje neuron |
| Adgrb3        | 0.00E+00 | 0.909 | 1.000 | 0.982 | 0.00E+00 | Purkinje neuron |
| Pcp2          | 0.00E+00 | 0.904 | 0.939 | 0.194 | 0.00E+00 | Purkinje neuron |
| Thsd7a        | 0.00E+00 | 0.885 | 0.858 | 0.090 | 0.00E+00 | Purkinje neuron |
| Elmo1         | 0.00E+00 | 0.882 | 0.916 | 0.138 | 0.00E+00 | Purkinje neuron |

|               |          |       |       |       |          |                 |
|---------------|----------|-------|-------|-------|----------|-----------------|
| Gpc6          | 0.00E+00 | 0.861 | 0.809 | 0.101 | 0.00E+00 | Purkinje neuron |
| Frmd5         | 0.00E+00 | 0.859 | 0.957 | 0.295 | 0.00E+00 | Purkinje neuron |
| Sox5          | 0.00E+00 | 0.849 | 0.882 | 0.094 | 0.00E+00 | Purkinje neuron |
| Gpr63         | 0.00E+00 | 0.844 | 0.843 | 0.053 | 0.00E+00 | Purkinje neuron |
| Khdrbs2       | 0.00E+00 | 0.844 | 0.857 | 0.087 | 0.00E+00 | Purkinje neuron |
| Cdh12         | 0.00E+00 | 0.844 | 0.714 | 0.073 | 0.00E+00 | Purkinje neuron |
| Mtss1         | 0.00E+00 | 0.842 | 0.862 | 0.095 | 0.00E+00 | Purkinje neuron |
| Epha6         | 0.00E+00 | 0.841 | 0.808 | 0.053 | 0.00E+00 | Purkinje neuron |
| Arhgap26      | 0.00E+00 | 0.836 | 0.947 | 0.275 | 0.00E+00 | Purkinje neuron |
| Zfand4        | 0.00E+00 | 0.831 | 0.804 | 0.056 | 0.00E+00 | Purkinje neuron |
| Kcnab1        | 0.00E+00 | 0.828 | 0.877 | 0.200 | 0.00E+00 | Purkinje neuron |
| Foxp2         | 0.00E+00 | 0.827 | 0.824 | 0.062 | 0.00E+00 | Purkinje neuron |
| Lrrtm4        | 0.00E+00 | 0.821 | 0.694 | 0.087 | 0.00E+00 | Purkinje neuron |
| Dach1         | 0.00E+00 | 0.821 | 0.800 | 0.071 | 0.00E+00 | Purkinje neuron |
| Kcnh7         | 0.00E+00 | 0.812 | 0.716 | 0.045 | 0.00E+00 | Purkinje neuron |
| Trpc3         | 0.00E+00 | 0.802 | 0.822 | 0.061 | 0.00E+00 | Purkinje neuron |
| Egfem1        | 0.00E+00 | 0.800 | 0.512 | 0.022 | 0.00E+00 | Purkinje neuron |
| A330015K06Rik | 0.00E+00 | 0.796 | 0.708 | 0.121 | 0.00E+00 | Purkinje neuron |
| Mast4         | 0.00E+00 | 0.786 | 0.842 | 0.092 | 0.00E+00 | Purkinje neuron |
| Col18a1       | 0.00E+00 | 0.786 | 0.771 | 0.046 | 0.00E+00 | Purkinje neuron |
| Lingo2        | 0.00E+00 | 0.784 | 0.691 | 0.071 | 0.00E+00 | Purkinje neuron |
| Sema3a        | 0.00E+00 | 0.780 | 0.595 | 0.058 | 0.00E+00 | Purkinje neuron |
| 9630028H03Rik | 0.00E+00 | 0.772 | 0.471 | 0.115 | 0.00E+00 | Purkinje neuron |
| Inpp5a        | 0.00E+00 | 0.765 | 0.848 | 0.106 | 0.00E+00 | Purkinje neuron |
| Rbms1         | 0.00E+00 | 0.759 | 0.789 | 0.075 | 0.00E+00 | Purkinje neuron |
| Rasa2         | 0.00E+00 | 0.758 | 0.848 | 0.166 | 0.00E+00 | Purkinje neuron |
| Gm44040       | 0.00E+00 | 0.754 | 0.675 | 0.018 | 0.00E+00 | Purkinje neuron |
| Atrnl1        | 0.00E+00 | 0.750 | 0.801 | 0.055 | 0.00E+00 | Purkinje neuron |
| Stac          | 0.00E+00 | 0.740 | 0.713 | 0.025 | 0.00E+00 | Purkinje neuron |
| Epha5         | 0.00E+00 | 0.736 | 0.540 | 0.103 | 0.00E+00 | Purkinje neuron |
| Snhg11        | 0.00E+00 | 0.736 | 1.000 | 0.943 | 0.00E+00 | Purkinje neuron |
| Gm26713       | 0.00E+00 | 0.736 | 0.590 | 0.019 | 0.00E+00 | Purkinje neuron |
| Strn3         | 0.00E+00 | 0.729 | 0.950 | 0.405 | 0.00E+00 | Purkinje neuron |
| Tenm3         | 0.00E+00 | 0.728 | 0.454 | 0.030 | 0.00E+00 | Purkinje neuron |
| Gm42439       | 0.00E+00 | 0.726 | 0.817 | 0.236 | 0.00E+00 | Purkinje neuron |
| Slc35f1       | 0.00E+00 | 0.712 | 0.727 | 0.045 | 0.00E+00 | Purkinje neuron |
| Arhgap32      | 0.00E+00 | 0.711 | 0.764 | 0.053 | 0.00E+00 | Purkinje neuron |
| Grm1          | 0.00E+00 | 0.706 | 0.995 | 0.772 | 0.00E+00 | Purkinje neuron |
| Aff1          | 0.00E+00 | 0.705 | 0.668 | 0.041 | 0.00E+00 | Purkinje neuron |
| Pde5a         | 0.00E+00 | 0.705 | 0.714 | 0.031 | 0.00E+00 | Purkinje neuron |
| Washc2        | 0.00E+00 | 0.700 | 0.806 | 0.092 | 0.00E+00 | Purkinje neuron |
| Dgkz          | 0.00E+00 | 0.681 | 0.810 | 0.125 | 0.00E+00 | Purkinje neuron |
| Magi2         | 0.00E+00 | 0.680 | 1.000 | 0.981 | 0.00E+00 | Purkinje neuron |
| Zfp385c       | 0.00E+00 | 0.675 | 0.716 | 0.033 | 0.00E+00 | Purkinje neuron |

|               |          |       |       |       |          |                 |
|---------------|----------|-------|-------|-------|----------|-----------------|
| Calb1         | 0.00E+00 | 0.670 | 0.818 | 0.131 | 0.00E+00 | Purkinje neuron |
| Cntnap5a      | 0.00E+00 | 0.670 | 0.604 | 0.034 | 0.00E+00 | Purkinje neuron |
| Myo10         | 0.00E+00 | 0.668 | 0.815 | 0.129 | 0.00E+00 | Purkinje neuron |
| Cntn5         | 0.00E+00 | 0.667 | 0.498 | 0.061 | 0.00E+00 | Purkinje neuron |
| Ebf2          | 0.00E+00 | 0.662 | 0.525 | 0.015 | 0.00E+00 | Purkinje neuron |
| Tenm4         | 0.00E+00 | 0.661 | 0.710 | 0.045 | 0.00E+00 | Purkinje neuron |
| Gm44071       | 0.00E+00 | 0.661 | 0.660 | 0.040 | 0.00E+00 | Purkinje neuron |
| Ksr2          | 0.00E+00 | 0.661 | 0.843 | 0.188 | 0.00E+00 | Purkinje neuron |
| Sos1          | 0.00E+00 | 0.660 | 0.743 | 0.116 | 0.00E+00 | Purkinje neuron |
| Pcsk6         | 0.00E+00 | 0.658 | 0.663 | 0.032 | 0.00E+00 | Purkinje neuron |
| Arhgap5       | 0.00E+00 | 0.650 | 0.869 | 0.265 | 0.00E+00 | Purkinje neuron |
| Vav3          | 0.00E+00 | 0.648 | 0.672 | 0.045 | 0.00E+00 | Purkinje neuron |
| Abr           | 0.00E+00 | 0.636 | 0.629 | 0.035 | 0.00E+00 | Purkinje neuron |
| Ccdc85a       | 0.00E+00 | 0.635 | 0.663 | 0.038 | 0.00E+00 | Purkinje neuron |
| Prkcg         | 0.00E+00 | 0.635 | 0.695 | 0.039 | 0.00E+00 | Purkinje neuron |
| Srgap1        | 0.00E+00 | 0.634 | 0.694 | 0.051 | 0.00E+00 | Purkinje neuron |
| Ppp1r16b      | 0.00E+00 | 0.634 | 0.694 | 0.050 | 0.00E+00 | Purkinje neuron |
| Arhgap20      | 0.00E+00 | 0.631 | 0.663 | 0.069 | 0.00E+00 | Purkinje neuron |
| Fam107b       | 0.00E+00 | 0.630 | 0.610 | 0.058 | 0.00E+00 | Purkinje neuron |
| Dgkb          | 0.00E+00 | 0.630 | 0.606 | 0.122 | 0.00E+00 | Purkinje neuron |
| Kitl          | 0.00E+00 | 0.626 | 0.644 | 0.105 | 0.00E+00 | Purkinje neuron |
| Far2          | 0.00E+00 | 0.620 | 0.597 | 0.047 | 0.00E+00 | Purkinje neuron |
| Robo2         | 0.00E+00 | 0.620 | 0.569 | 0.043 | 0.00E+00 | Purkinje neuron |
| CT025619.1    | 0.00E+00 | 0.617 | 0.673 | 0.090 | 0.00E+00 | Purkinje neuron |
| Hdac9         | 0.00E+00 | 0.606 | 0.741 | 0.140 | 0.00E+00 | Purkinje neuron |
| Ppp4r4        | 0.00E+00 | 0.606 | 0.659 | 0.045 | 0.00E+00 | Purkinje neuron |
| Grid2ip       | 0.00E+00 | 0.603 | 0.610 | 0.021 | 0.00E+00 | Purkinje neuron |
| Arhgap31      | 0.00E+00 | 0.597 | 0.653 | 0.042 | 0.00E+00 | Purkinje neuron |
| Erc2          | 0.00E+00 | 0.587 | 0.545 | 0.175 | 0.00E+00 | Purkinje neuron |
| Cep126        | 0.00E+00 | 0.580 | 0.623 | 0.079 | 0.00E+00 | Purkinje neuron |
| Arap2         | 0.00E+00 | 0.577 | 0.637 | 0.056 | 0.00E+00 | Purkinje neuron |
| Slc1a6        | 0.00E+00 | 0.574 | 0.668 | 0.219 | 0.00E+00 | Purkinje neuron |
| 4930587E11Rik | 0.00E+00 | 0.570 | 0.429 | 0.025 | 0.00E+00 | Purkinje neuron |
| Trim9         | 0.00E+00 | 0.564 | 0.689 | 0.123 | 0.00E+00 | Purkinje neuron |
| Atl2          | 0.00E+00 | 0.561 | 0.733 | 0.128 | 0.00E+00 | Purkinje neuron |
| Zdhhc14       | 0.00E+00 | 0.561 | 0.775 | 0.192 | 0.00E+00 | Purkinje neuron |
| Sycp1         | 0.00E+00 | 0.557 | 0.567 | 0.021 | 0.00E+00 | Purkinje neuron |
| Clmn          | 0.00E+00 | 0.550 | 0.614 | 0.037 | 0.00E+00 | Purkinje neuron |
| Homer3        | 0.00E+00 | 0.549 | 0.630 | 0.055 | 0.00E+00 | Purkinje neuron |
| Plcb1         | 0.00E+00 | 0.548 | 0.589 | 0.243 | 0.00E+00 | Purkinje neuron |
| 4930567K20Rik | 0.00E+00 | 0.547 | 0.637 | 0.158 | 0.00E+00 | Purkinje neuron |
| Nup93         | 0.00E+00 | 0.544 | 0.594 | 0.041 | 0.00E+00 | Purkinje neuron |
| AC163354.1    | 0.00E+00 | 0.544 | 0.526 | 0.015 | 0.00E+00 | Purkinje neuron |
| Nwd2          | 0.00E+00 | 0.539 | 0.485 | 0.033 | 0.00E+00 | Purkinje neuron |

|          |          |       |       |       |          |                 |
|----------|----------|-------|-------|-------|----------|-----------------|
| Rbms3    | 0.00E+00 | 0.537 | 0.609 | 0.045 | 0.00E+00 | Purkinje neuron |
| Gm32647  | 0.00E+00 | 0.537 | 0.264 | 0.015 | 0.00E+00 | Purkinje neuron |
| Dgki     | 0.00E+00 | 0.536 | 0.761 | 0.204 | 0.00E+00 | Purkinje neuron |
| Sptan1   | 0.00E+00 | 0.536 | 0.769 | 0.228 | 0.00E+00 | Purkinje neuron |
| Heatr5a  | 0.00E+00 | 0.534 | 0.594 | 0.052 | 0.00E+00 | Purkinje neuron |
| Phactr2  | 0.00E+00 | 0.528 | 0.590 | 0.041 | 0.00E+00 | Purkinje neuron |
| Lhfpl3   | 0.00E+00 | 0.527 | 0.613 | 0.098 | 0.00E+00 | Purkinje neuron |
| Sox5os4  | 0.00E+00 | 0.525 | 0.532 | 0.017 | 0.00E+00 | Purkinje neuron |
| Trabd2b  | 0.00E+00 | 0.525 | 0.499 | 0.022 | 0.00E+00 | Purkinje neuron |
| Corin    | 0.00E+00 | 0.524 | 0.442 | 0.014 | 0.00E+00 | Purkinje neuron |
| Ccdc88a  | 0.00E+00 | 0.521 | 0.687 | 0.108 | 0.00E+00 | Purkinje neuron |
| Foxp4    | 0.00E+00 | 0.519 | 0.567 | 0.018 | 0.00E+00 | Purkinje neuron |
| Cpeb1    | 0.00E+00 | 0.516 | 0.589 | 0.035 | 0.00E+00 | Purkinje neuron |
| Cdk14    | 0.00E+00 | 0.515 | 0.639 | 0.075 | 0.00E+00 | Purkinje neuron |
| Rgs8     | 0.00E+00 | 0.513 | 0.545 | 0.048 | 0.00E+00 | Purkinje neuron |
| Atp2a3   | 0.00E+00 | 0.509 | 0.567 | 0.033 | 0.00E+00 | Purkinje neuron |
| Plekhd1  | 0.00E+00 | 0.508 | 0.565 | 0.021 | 0.00E+00 | Purkinje neuron |
| Inpp4a   | 0.00E+00 | 0.507 | 0.651 | 0.110 | 0.00E+00 | Purkinje neuron |
| Slc9a3   | 0.00E+00 | 0.506 | 0.557 | 0.027 | 0.00E+00 | Purkinje neuron |
| Rreb1    | 0.00E+00 | 0.503 | 0.584 | 0.042 | 0.00E+00 | Purkinje neuron |
| Nrk      | 0.00E+00 | 0.498 | 0.521 | 0.041 | 0.00E+00 | Purkinje neuron |
| Ryr1     | 0.00E+00 | 0.496 | 0.540 | 0.015 | 0.00E+00 | Purkinje neuron |
| Muc3a    | 0.00E+00 | 0.489 | 0.506 | 0.037 | 0.00E+00 | Purkinje neuron |
| Bcl11a   | 0.00E+00 | 0.488 | 0.507 | 0.015 | 0.00E+00 | Purkinje neuron |
| Akap6    | 0.00E+00 | 0.483 | 0.805 | 0.290 | 0.00E+00 | Purkinje neuron |
| Sntg1    | 0.00E+00 | 0.481 | 0.457 | 0.071 | 0.00E+00 | Purkinje neuron |
| Agbl4    | 0.00E+00 | 0.478 | 0.529 | 0.055 | 0.00E+00 | Purkinje neuron |
| Pde9a    | 0.00E+00 | 0.477 | 0.520 | 0.038 | 0.00E+00 | Purkinje neuron |
| Dscam    | 0.00E+00 | 0.476 | 0.590 | 0.080 | 0.00E+00 | Purkinje neuron |
| Immp2l   | 0.00E+00 | 0.475 | 0.679 | 0.161 | 0.00E+00 | Purkinje neuron |
| Lrch1    | 0.00E+00 | 0.469 | 0.578 | 0.091 | 0.00E+00 | Purkinje neuron |
| Gm15336  | 0.00E+00 | 0.469 | 0.502 | 0.040 | 0.00E+00 | Purkinje neuron |
| Cacna2d2 | 0.00E+00 | 0.464 | 0.620 | 0.113 | 0.00E+00 | Purkinje neuron |
| Ppp1r17  | 0.00E+00 | 0.464 | 0.536 | 0.043 | 0.00E+00 | Purkinje neuron |
| Eml6     | 0.00E+00 | 0.464 | 0.779 | 0.278 | 0.00E+00 | Purkinje neuron |
| Svil     | 0.00E+00 | 0.463 | 0.506 | 0.026 | 0.00E+00 | Purkinje neuron |
| Sept11   | 0.00E+00 | 0.463 | 0.629 | 0.112 | 0.00E+00 | Purkinje neuron |
| Hpcal1   | 0.00E+00 | 0.462 | 0.539 | 0.053 | 0.00E+00 | Purkinje neuron |
| Spock3   | 0.00E+00 | 0.460 | 0.624 | 0.110 | 0.00E+00 | Purkinje neuron |
| Lrrfip1  | 0.00E+00 | 0.458 | 0.557 | 0.055 | 0.00E+00 | Purkinje neuron |
| Frmfd3   | 0.00E+00 | 0.457 | 0.409 | 0.016 | 0.00E+00 | Purkinje neuron |
| Efr3a    | 0.00E+00 | 0.455 | 0.526 | 0.097 | 0.00E+00 | Purkinje neuron |
| Celf2    | 0.00E+00 | 0.455 | 0.993 | 0.792 | 0.00E+00 | Purkinje neuron |
| Adam23   | 0.00E+00 | 0.454 | 0.767 | 0.242 | 0.00E+00 | Purkinje neuron |

|               |          |       |       |       |          |                 |
|---------------|----------|-------|-------|-------|----------|-----------------|
| Cpne8         | 0.00E+00 | 0.453 | 0.472 | 0.020 | 0.00E+00 | Purkinje neuron |
| Ptprr         | 0.00E+00 | 0.450 | 0.845 | 0.323 | 0.00E+00 | Purkinje neuron |
| Gm20635       | 0.00E+00 | 0.450 | 0.483 | 0.019 | 0.00E+00 | Purkinje neuron |
| Plxdc2        | 0.00E+00 | 0.449 | 0.663 | 0.157 | 0.00E+00 | Purkinje neuron |
| Exoc6b        | 0.00E+00 | 0.449 | 0.707 | 0.213 | 0.00E+00 | Purkinje neuron |
| Cep76         | 0.00E+00 | 0.447 | 0.498 | 0.026 | 0.00E+00 | Purkinje neuron |
| Gria1         | 0.00E+00 | 0.447 | 0.601 | 0.060 | 0.00E+00 | Purkinje neuron |
| Efna5         | 0.00E+00 | 0.445 | 0.426 | 0.033 | 0.00E+00 | Purkinje neuron |
| Psd2          | 0.00E+00 | 0.445 | 0.515 | 0.028 | 0.00E+00 | Purkinje neuron |
| Edil3         | 0.00E+00 | 0.445 | 0.591 | 0.080 | 0.00E+00 | Purkinje neuron |
| Dgkg          | 0.00E+00 | 0.444 | 0.691 | 0.192 | 0.00E+00 | Purkinje neuron |
| Grik4         | 0.00E+00 | 0.440 | 0.492 | 0.025 | 0.00E+00 | Purkinje neuron |
| Mir9-3hg      | 0.00E+00 | 0.439 | 0.571 | 0.085 | 0.00E+00 | Purkinje neuron |
| Gm48747       | 0.00E+00 | 0.438 | 0.514 | 0.097 | 0.00E+00 | Purkinje neuron |
| Prkd1         | 0.00E+00 | 0.434 | 0.486 | 0.032 | 0.00E+00 | Purkinje neuron |
| Ccdc50        | 0.00E+00 | 0.434 | 0.595 | 0.116 | 0.00E+00 | Purkinje neuron |
| Prmt8         | 0.00E+00 | 0.430 | 0.486 | 0.035 | 0.00E+00 | Purkinje neuron |
| Hipk2         | 0.00E+00 | 0.428 | 0.622 | 0.132 | 0.00E+00 | Purkinje neuron |
| Sptbn2        | 0.00E+00 | 0.427 | 0.558 | 0.077 | 0.00E+00 | Purkinje neuron |
| Mei4          | 0.00E+00 | 0.425 | 0.425 | 0.027 | 0.00E+00 | Purkinje neuron |
| Gm32036       | 0.00E+00 | 0.425 | 0.445 | 0.016 | 0.00E+00 | Purkinje neuron |
| Meg3          | 0.00E+00 | 0.422 | 0.999 | 0.941 | 0.00E+00 | Purkinje neuron |
| C78859        | 0.00E+00 | 0.421 | 0.487 | 0.039 | 0.00E+00 | Purkinje neuron |
| Park2         | 0.00E+00 | 0.419 | 0.719 | 0.213 | 0.00E+00 | Purkinje neuron |
| Casq2         | 0.00E+00 | 0.418 | 0.474 | 0.031 | 0.00E+00 | Purkinje neuron |
| Ano6          | 0.00E+00 | 0.417 | 0.483 | 0.032 | 0.00E+00 | Purkinje neuron |
| Mprip         | 0.00E+00 | 0.416 | 0.651 | 0.186 | 0.00E+00 | Purkinje neuron |
| Dlgap4        | 0.00E+00 | 0.416 | 0.513 | 0.063 | 0.00E+00 | Purkinje neuron |
| Shank1        | 0.00E+00 | 0.413 | 0.517 | 0.064 | 0.00E+00 | Purkinje neuron |
| Adamts3       | 0.00E+00 | 0.412 | 0.433 | 0.018 | 0.00E+00 | Purkinje neuron |
| Aatf          | 0.00E+00 | 0.410 | 0.520 | 0.086 | 0.00E+00 | Purkinje neuron |
| Gm30524       | 0.00E+00 | 0.407 | 0.410 | 0.019 | 0.00E+00 | Purkinje neuron |
| Wdr17         | 0.00E+00 | 0.406 | 0.547 | 0.079 | 0.00E+00 | Purkinje neuron |
| Nell1os       | 0.00E+00 | 0.405 | 0.424 | 0.028 | 0.00E+00 | Purkinje neuron |
| Nol4          | 0.00E+00 | 0.404 | 0.657 | 0.202 | 0.00E+00 | Purkinje neuron |
| Strip2        | 0.00E+00 | 0.404 | 0.466 | 0.047 | 0.00E+00 | Purkinje neuron |
| Gria2         | 0.00E+00 | 0.400 | 0.998 | 0.909 | 0.00E+00 | Purkinje neuron |
| Fstl4         | 0.00E+00 | 0.398 | 0.417 | 0.079 | 0.00E+00 | Purkinje neuron |
| Stim1         | 0.00E+00 | 0.396 | 0.555 | 0.131 | 0.00E+00 | Purkinje neuron |
| 1700111E14Rik | 0.00E+00 | 0.393 | 0.455 | 0.066 | 0.00E+00 | Purkinje neuron |
| Sybu          | 0.00E+00 | 0.392 | 0.747 | 0.280 | 0.00E+00 | Purkinje neuron |
| MacroD2       | 0.00E+00 | 0.391 | 0.983 | 0.739 | 0.00E+00 | Purkinje neuron |
| Chn1          | 0.00E+00 | 0.391 | 0.440 | 0.034 | 0.00E+00 | Purkinje neuron |
| Fam13b        | 0.00E+00 | 0.382 | 0.560 | 0.156 | 0.00E+00 | Purkinje neuron |

|               |          |       |       |       |          |                 |
|---------------|----------|-------|-------|-------|----------|-----------------|
| Prkca         | 0.00E+00 | 0.381 | 0.457 | 0.099 | 0.00E+00 | Purkinje neuron |
| Rgs7bp        | 0.00E+00 | 0.379 | 0.601 | 0.170 | 0.00E+00 | Purkinje neuron |
| Sestd1        | 0.00E+00 | 0.378 | 0.506 | 0.081 | 0.00E+00 | Purkinje neuron |
| Flt3          | 0.00E+00 | 0.377 | 0.448 | 0.037 | 0.00E+00 | Purkinje neuron |
| Fam155a       | 0.00E+00 | 0.375 | 0.985 | 0.717 | 0.00E+00 | Purkinje neuron |
| Cacna1g       | 0.00E+00 | 0.374 | 0.483 | 0.059 | 0.00E+00 | Purkinje neuron |
| Clic6         | 0.00E+00 | 0.366 | 0.367 | 0.014 | 0.00E+00 | Purkinje neuron |
| Rhobtb2       | 0.00E+00 | 0.365 | 0.404 | 0.034 | 0.00E+00 | Purkinje neuron |
| Csad          | 0.00E+00 | 0.363 | 0.437 | 0.055 | 0.00E+00 | Purkinje neuron |
| Tanc2         | 0.00E+00 | 0.363 | 0.537 | 0.121 | 0.00E+00 | Purkinje neuron |
| Gm27032       | 0.00E+00 | 0.362 | 0.674 | 0.250 | 0.00E+00 | Purkinje neuron |
| Adgrl2        | 0.00E+00 | 0.358 | 0.409 | 0.042 | 0.00E+00 | Purkinje neuron |
| Trio          | 0.00E+00 | 0.357 | 0.680 | 0.227 | 0.00E+00 | Purkinje neuron |
| Clstn2        | 0.00E+00 | 0.356 | 0.461 | 0.157 | 0.00E+00 | Purkinje neuron |
| Ntm           | 0.00E+00 | 0.351 | 0.998 | 0.961 | 0.00E+00 | Purkinje neuron |
| Arntl         | 0.00E+00 | 0.350 | 0.480 | 0.089 | 0.00E+00 | Purkinje neuron |
| Tacc1         | 0.00E+00 | 0.348 | 0.487 | 0.121 | 0.00E+00 | Purkinje neuron |
| Baiap2        | 0.00E+00 | 0.348 | 0.476 | 0.082 | 0.00E+00 | Purkinje neuron |
| Klhl1         | 0.00E+00 | 0.346 | 0.341 | 0.017 | 0.00E+00 | Purkinje neuron |
| Gm40841       | 0.00E+00 | 0.345 | 0.445 | 0.066 | 0.00E+00 | Purkinje neuron |
| Fam184b       | 0.00E+00 | 0.345 | 0.432 | 0.051 | 0.00E+00 | Purkinje neuron |
| 4930567K12Rik | 0.00E+00 | 0.343 | 0.367 | 0.018 | 0.00E+00 | Purkinje neuron |
| Dagla         | 0.00E+00 | 0.342 | 0.420 | 0.039 | 0.00E+00 | Purkinje neuron |
| Slc23a2       | 0.00E+00 | 0.339 | 0.482 | 0.109 | 0.00E+00 | Purkinje neuron |
| Ccdc148       | 0.00E+00 | 0.339 | 0.375 | 0.026 | 0.00E+00 | Purkinje neuron |
| Il1rap        | 0.00E+00 | 0.338 | 0.413 | 0.042 | 0.00E+00 | Purkinje neuron |
| Itifb         | 0.00E+00 | 0.337 | 0.430 | 0.070 | 0.00E+00 | Purkinje neuron |
| Ano4          | 0.00E+00 | 0.337 | 0.429 | 0.053 | 0.00E+00 | Purkinje neuron |
| Btbd10        | 0.00E+00 | 0.335 | 0.526 | 0.133 | 0.00E+00 | Purkinje neuron |
| Pbx3          | 0.00E+00 | 0.335 | 0.391 | 0.120 | 0.00E+00 | Purkinje neuron |
| Gm47710       | 0.00E+00 | 0.334 | 0.387 | 0.080 | 0.00E+00 | Purkinje neuron |
| Spire1        | 0.00E+00 | 0.332 | 0.595 | 0.188 | 0.00E+00 | Purkinje neuron |
| Hcn1          | 0.00E+00 | 0.332 | 0.822 | 0.293 | 0.00E+00 | Purkinje neuron |
| Gabbr2        | 0.00E+00 | 0.332 | 0.650 | 0.264 | 0.00E+00 | Purkinje neuron |
| Lin28b        | 0.00E+00 | 0.330 | 0.396 | 0.057 | 0.00E+00 | Purkinje neuron |
| Vwa8          | 0.00E+00 | 0.329 | 0.493 | 0.163 | 0.00E+00 | Purkinje neuron |
| Cerk          | 0.00E+00 | 0.326 | 0.441 | 0.087 | 0.00E+00 | Purkinje neuron |
| 1700016K05Rik | 0.00E+00 | 0.326 | 0.329 | 0.008 | 0.00E+00 | Purkinje neuron |
| Sh3d19        | 0.00E+00 | 0.326 | 0.462 | 0.093 | 0.00E+00 | Purkinje neuron |
| Zfp462        | 0.00E+00 | 0.325 | 0.417 | 0.061 | 0.00E+00 | Purkinje neuron |
| Tm6sf1        | 0.00E+00 | 0.325 | 0.428 | 0.065 | 0.00E+00 | Purkinje neuron |
| Cyth3         | 0.00E+00 | 0.323 | 0.366 | 0.029 | 0.00E+00 | Purkinje neuron |
| Camk2a        | 0.00E+00 | 0.322 | 0.356 | 0.008 | 0.00E+00 | Purkinje neuron |
| Zswim5        | 0.00E+00 | 0.316 | 0.404 | 0.067 | 0.00E+00 | Purkinje neuron |

|          |          |       |       |       |          |                 |
|----------|----------|-------|-------|-------|----------|-----------------|
| Srgap2   | 0.00E+00 | 0.315 | 0.796 | 0.351 | 0.00E+00 | Purkinje neuron |
| Ptpn13   | 0.00E+00 | 0.315 | 0.352 | 0.018 | 0.00E+00 | Purkinje neuron |
| Cadps    | 0.00E+00 | 0.314 | 0.750 | 0.323 | 0.00E+00 | Purkinje neuron |
| Gm30313  | 0.00E+00 | 0.314 | 0.349 | 0.009 | 0.00E+00 | Purkinje neuron |
| Atp2b2   | 0.00E+00 | 0.313 | 0.878 | 0.449 | 0.00E+00 | Purkinje neuron |
| Ripor2   | 0.00E+00 | 0.312 | 0.325 | 0.013 | 0.00E+00 | Purkinje neuron |
| Gm14372  | 0.00E+00 | 0.311 | 0.353 | 0.017 | 0.00E+00 | Purkinje neuron |
| Dync1i1  | 0.00E+00 | 0.310 | 0.693 | 0.298 | 0.00E+00 | Purkinje neuron |
| Dnah6    | 0.00E+00 | 0.310 | 0.335 | 0.009 | 0.00E+00 | Purkinje neuron |
| Hes3     | 0.00E+00 | 0.310 | 0.354 | 0.022 | 0.00E+00 | Purkinje neuron |
| Ablim2   | 0.00E+00 | 0.309 | 0.383 | 0.049 | 0.00E+00 | Purkinje neuron |
| Gm45881  | 0.00E+00 | 0.309 | 0.378 | 0.042 | 0.00E+00 | Purkinje neuron |
| Kctd1    | 0.00E+00 | 0.308 | 0.382 | 0.051 | 0.00E+00 | Purkinje neuron |
| Nr6a1    | 0.00E+00 | 0.308 | 0.433 | 0.090 | 0.00E+00 | Purkinje neuron |
| Zzef1    | 0.00E+00 | 0.307 | 0.488 | 0.136 | 0.00E+00 | Purkinje neuron |
| Stk17b   | 0.00E+00 | 0.305 | 0.333 | 0.015 | 0.00E+00 | Purkinje neuron |
| Eml1     | 0.00E+00 | 0.303 | 0.475 | 0.107 | 0.00E+00 | Purkinje neuron |
| Ralgapa2 | 0.00E+00 | 0.303 | 0.482 | 0.121 | 0.00E+00 | Purkinje neuron |
| Gm48512  | 0.00E+00 | 0.303 | 0.389 | 0.070 | 0.00E+00 | Purkinje neuron |
| Zbtb46   | 0.00E+00 | 0.303 | 0.461 | 0.109 | 0.00E+00 | Purkinje neuron |
| Slc4a10  | 0.00E+00 | 0.303 | 0.705 | 0.279 | 0.00E+00 | Purkinje neuron |
| Ccar1    | 0.00E+00 | 0.302 | 0.537 | 0.188 | 0.00E+00 | Purkinje neuron |
| Wnk2     | 0.00E+00 | 0.302 | 0.513 | 0.145 | 0.00E+00 | Purkinje neuron |
| Gm48166  | 0.00E+00 | 0.300 | 0.361 | 0.112 | 0.00E+00 | Purkinje neuron |
| Ap2b1    | 0.00E+00 | 0.300 | 0.486 | 0.129 | 0.00E+00 | Purkinje neuron |
| Ptk2     | 0.00E+00 | 0.300 | 0.554 | 0.169 | 0.00E+00 | Purkinje neuron |
| Man1a    | 0.00E+00 | 0.300 | 0.340 | 0.028 | 0.00E+00 | Purkinje neuron |
| B3galnt2 | 0.00E+00 | 0.299 | 0.394 | 0.061 | 0.00E+00 | Purkinje neuron |
| Atp2c1   | 0.00E+00 | 0.298 | 0.592 | 0.208 | 0.00E+00 | Purkinje neuron |
| Galnt10  | 0.00E+00 | 0.297 | 0.340 | 0.022 | 0.00E+00 | Purkinje neuron |
| Gm11099  | 0.00E+00 | 0.297 | 0.306 | 0.012 | 0.00E+00 | Purkinje neuron |
| Myh10    | 0.00E+00 | 0.296 | 0.426 | 0.091 | 0.00E+00 | Purkinje neuron |
| Gm27226  | 0.00E+00 | 0.296 | 0.320 | 0.004 | 0.00E+00 | Purkinje neuron |
| Kcnd3    | 0.00E+00 | 0.295 | 0.517 | 0.162 | 0.00E+00 | Purkinje neuron |
| Slc6a6   | 0.00E+00 | 0.295 | 0.396 | 0.070 | 0.00E+00 | Purkinje neuron |
| Dlc1     | 0.00E+00 | 0.293 | 0.283 | 0.084 | 0.00E+00 | Purkinje neuron |
| Nlk      | 0.00E+00 | 0.292 | 0.477 | 0.135 | 0.00E+00 | Purkinje neuron |
| Capn15   | 0.00E+00 | 0.292 | 0.486 | 0.145 | 0.00E+00 | Purkinje neuron |
| Birc2    | 0.00E+00 | 0.291 | 0.447 | 0.123 | 0.00E+00 | Purkinje neuron |
| Rps6ka5  | 0.00E+00 | 0.290 | 0.460 | 0.152 | 0.00E+00 | Purkinje neuron |
| Bcar1    | 0.00E+00 | 0.290 | 0.346 | 0.034 | 0.00E+00 | Purkinje neuron |
| Gm20647  | 0.00E+00 | 0.289 | 0.262 | 0.005 | 0.00E+00 | Purkinje neuron |
| Ubash3b  | 0.00E+00 | 0.289 | 0.448 | 0.139 | 0.00E+00 | Purkinje neuron |
| Acyp2    | 0.00E+00 | 0.289 | 0.416 | 0.135 | 0.00E+00 | Purkinje neuron |



|               |          |       |       |       |          |                 |
|---------------|----------|-------|-------|-------|----------|-----------------|
| Plxdc1        | 0.00E+00 | 0.289 | 0.338 | 0.024 | 0.00E+00 | Purkinje neuron |
| Susd4         | 0.00E+00 | 0.289 | 0.369 | 0.048 | 0.00E+00 | Purkinje neuron |
| Mfhas1        | 0.00E+00 | 0.287 | 0.389 | 0.073 | 0.00E+00 | Purkinje neuron |
| Fras1         | 0.00E+00 | 0.286 | 0.313 | 0.007 | 0.00E+00 | Purkinje neuron |
| Akain1        | 0.00E+00 | 0.285 | 0.336 | 0.027 | 0.00E+00 | Purkinje neuron |
| Gm15046       | 0.00E+00 | 0.285 | 0.294 | 0.008 | 0.00E+00 | Purkinje neuron |
| Itpka         | 0.00E+00 | 0.284 | 0.325 | 0.022 | 0.00E+00 | Purkinje neuron |
| Phtf2         | 0.00E+00 | 0.283 | 0.384 | 0.073 | 0.00E+00 | Purkinje neuron |
| Rictor        | 0.00E+00 | 0.279 | 0.420 | 0.104 | 0.00E+00 | Purkinje neuron |
| Syt7          | 0.00E+00 | 0.277 | 0.488 | 0.148 | 0.00E+00 | Purkinje neuron |
| Ppargc1a      | 0.00E+00 | 0.276 | 0.349 | 0.057 | 0.00E+00 | Purkinje neuron |
| Gnaq          | 0.00E+00 | 0.276 | 0.558 | 0.219 | 0.00E+00 | Purkinje neuron |
| Doc2b         | 0.00E+00 | 0.276 | 0.315 | 0.023 | 0.00E+00 | Purkinje neuron |
| Gm30382       | 0.00E+00 | 0.274 | 0.252 | 0.009 | 0.00E+00 | Purkinje neuron |
| Fcor          | 0.00E+00 | 0.274 | 0.317 | 0.024 | 0.00E+00 | Purkinje neuron |
| Hunk          | 0.00E+00 | 0.274 | 0.337 | 0.035 | 0.00E+00 | Purkinje neuron |
| Flnb          | 0.00E+00 | 0.274 | 0.377 | 0.075 | 0.00E+00 | Purkinje neuron |
| Pcdh17        | 0.00E+00 | 0.273 | 0.316 | 0.033 | 0.00E+00 | Purkinje neuron |
| 5730522E02Rik | 0.00E+00 | 0.273 | 0.321 | 0.034 | 0.00E+00 | Purkinje neuron |
| Fam117a       | 0.00E+00 | 0.272 | 0.266 | 0.009 | 0.00E+00 | Purkinje neuron |
| Gm26531       | 0.00E+00 | 0.272 | 0.296 | 0.012 | 0.00E+00 | Purkinje neuron |
| Pou2f1        | 0.00E+00 | 0.271 | 0.472 | 0.157 | 0.00E+00 | Purkinje neuron |
| A230006K03Rik | 0.00E+00 | 0.270 | 0.273 | 0.015 | 0.00E+00 | Purkinje neuron |
| Astn1         | 0.00E+00 | 0.268 | 0.411 | 0.100 | 0.00E+00 | Purkinje neuron |
| Gm17171       | 0.00E+00 | 0.268 | 0.275 | 0.009 | 0.00E+00 | Purkinje neuron |
| Pde7b         | 0.00E+00 | 0.267 | 0.321 | 0.028 | 0.00E+00 | Purkinje neuron |
| Wls           | 0.00E+00 | 0.266 | 0.330 | 0.040 | 0.00E+00 | Purkinje neuron |
| Abhd3         | 0.00E+00 | 0.266 | 0.349 | 0.077 | 0.00E+00 | Purkinje neuron |
| Chst8         | 0.00E+00 | 0.264 | 0.281 | 0.021 | 0.00E+00 | Purkinje neuron |
| Clec16a       | 0.00E+00 | 0.263 | 0.346 | 0.057 | 0.00E+00 | Purkinje neuron |
| Htr1b         | 0.00E+00 | 0.262 | 0.302 | 0.015 | 0.00E+00 | Purkinje neuron |
| Gfod1         | 0.00E+00 | 0.262 | 0.356 | 0.079 | 0.00E+00 | Purkinje neuron |
| Fam189a1      | 0.00E+00 | 0.261 | 0.322 | 0.038 | 0.00E+00 | Purkinje neuron |
| Cpne9         | 0.00E+00 | 0.260 | 0.277 | 0.026 | 0.00E+00 | Purkinje neuron |
| Gm4221        | 0.00E+00 | 0.260 | 0.298 | 0.029 | 0.00E+00 | Purkinje neuron |
| Eil2          | 0.00E+00 | 0.260 | 0.288 | 0.013 | 0.00E+00 | Purkinje neuron |
| Slc20a1       | 0.00E+00 | 0.260 | 0.374 | 0.077 | 0.00E+00 | Purkinje neuron |
| Gad1          | 0.00E+00 | 0.260 | 0.325 | 0.037 | 0.00E+00 | Purkinje neuron |
| Kank1         | 0.00E+00 | 0.260 | 0.309 | 0.023 | 0.00E+00 | Purkinje neuron |
| Apbb2         | 0.00E+00 | 0.259 | 0.571 | 0.222 | 0.00E+00 | Purkinje neuron |
| Lpgat1        | 0.00E+00 | 0.259 | 0.407 | 0.121 | 0.00E+00 | Purkinje neuron |
| Rabep1        | 0.00E+00 | 0.259 | 0.464 | 0.149 | 0.00E+00 | Purkinje neuron |
| Lancl1        | 0.00E+00 | 0.258 | 0.335 | 0.055 | 0.00E+00 | Purkinje neuron |
| Lhx1          | 0.00E+00 | 0.257 | 0.368 | 0.084 | 0.00E+00 | Purkinje neuron |

|            |          |       |       |       |          |                 |
|------------|----------|-------|-------|-------|----------|-----------------|
| Tmem132d   | 0.00E+00 | 0.257 | 0.265 | 0.011 | 0.00E+00 | Purkinje neuron |
| Mef2c      | 0.00E+00 | 0.257 | 0.410 | 0.099 | 0.00E+00 | Purkinje neuron |
| Nexn       | 0.00E+00 | 0.256 | 0.305 | 0.028 | 0.00E+00 | Purkinje neuron |
| Ank1       | 0.00E+00 | 0.256 | 0.576 | 0.226 | 0.00E+00 | Purkinje neuron |
| Gtf2ird1   | 0.00E+00 | 0.255 | 0.333 | 0.050 | 0.00E+00 | Purkinje neuron |
| Pbx1       | 0.00E+00 | 0.255 | 0.575 | 0.239 | 0.00E+00 | Purkinje neuron |
| Rap1gap2   | 0.00E+00 | 0.255 | 0.357 | 0.070 | 0.00E+00 | Purkinje neuron |
| Arhgap20os | 0.00E+00 | 0.253 | 0.284 | 0.018 | 0.00E+00 | Purkinje neuron |
| B3glct     | 0.00E+00 | 0.253 | 0.293 | 0.021 | 0.00E+00 | Purkinje neuron |
| Gm13629    | 0.00E+00 | 0.252 | 0.332 | 0.057 | 0.00E+00 | Purkinje neuron |
| Rtel1      | 0.00E+00 | 0.252 | 0.301 | 0.032 | 0.00E+00 | Purkinje neuron |
| Cpeb4      | 0.00E+00 | 0.252 | 0.491 | 0.187 | 0.00E+00 | Purkinje neuron |
| Elmod1     | 0.00E+00 | 0.252 | 0.500 | 0.164 | 0.00E+00 | Purkinje neuron |
| Prickle1   | 0.00E+00 | 0.252 | 0.368 | 0.072 | 0.00E+00 | Purkinje neuron |
| Dok6       | 0.00E+00 | 0.251 | 0.328 | 0.050 | 0.00E+00 | Purkinje neuron |
| Adarb2     | 0.00E+00 | 1.748 | 0.749 | 0.025 | 0.00E+00 | Interneuron     |
| Inpp4b1    | 0.00E+00 | 1.416 | 0.955 | 0.209 | 0.00E+00 | Interneuron     |
| Csmd1      | 0.00E+00 | 1.378 | 0.892 | 0.180 | 0.00E+00 | Interneuron     |
| Cacna2d3   | 0.00E+00 | 1.205 | 0.844 | 0.162 | 0.00E+00 | Interneuron     |
| Sgcd       | 0.00E+00 | 1.170 | 0.596 | 0.022 | 0.00E+00 | Interneuron     |
| Slc24a3    | 0.00E+00 | 1.130 | 0.738 | 0.023 | 0.00E+00 | Interneuron     |
| Nxph1      | 0.00E+00 | 1.084 | 0.348 | 0.035 | 0.00E+00 | Interneuron     |
| Ptprz1     | 0.00E+00 | 1.081 | 0.768 | 0.030 | 0.00E+00 | Interneuron     |
| Esrrg      | 0.00E+00 | 1.048 | 0.842 | 0.134 | 0.00E+00 | Interneuron     |
| Cacna1d    | 0.00E+00 | 1.044 | 0.889 | 0.337 | 0.00E+00 | Interneuron     |
| Sorcs3     | 0.00E+00 | 0.975 | 0.576 | 0.010 | 0.00E+00 | Interneuron     |
| Slc24a2    | 0.00E+00 | 0.959 | 0.852 | 0.233 | 0.00E+00 | Interneuron     |
| Grm8       | 0.00E+00 | 0.883 | 0.387 | 0.011 | 0.00E+00 | Interneuron     |
| Rtl4       | 0.00E+00 | 0.877 | 0.621 | 0.016 | 0.00E+00 | Interneuron     |
| Luzp2      | 0.00E+00 | 0.861 | 0.583 | 0.064 | 0.00E+00 | Interneuron     |
| Myt1l      | 0.00E+00 | 0.843 | 0.785 | 0.179 | 0.00E+00 | Interneuron     |
| Grid1      | 0.00E+00 | 0.833 | 0.568 | 0.017 | 0.00E+00 | Interneuron     |
| Kit        | 0.00E+00 | 0.803 | 0.663 | 0.004 | 0.00E+00 | Interneuron     |
| Ptprk      | 0.00E+00 | 0.793 | 0.543 | 0.026 | 0.00E+00 | Interneuron     |
| Myo16      | 0.00E+00 | 0.747 | 0.644 | 0.065 | 0.00E+00 | Interneuron     |
| Tnr        | 0.00E+00 | 0.737 | 0.599 | 0.075 | 0.00E+00 | Interneuron     |
| March11    | 0.00E+00 | 0.681 | 0.534 | 0.051 | 0.00E+00 | Interneuron     |
| Slc6a1     | 0.00E+00 | 0.639 | 0.585 | 0.039 | 0.00E+00 | Interneuron     |
| Grin2b     | 0.00E+00 | 0.593 | 0.459 | 0.022 | 0.00E+00 | Interneuron     |
| Nkain2     | 0.00E+00 | 0.587 | 0.691 | 0.139 | 0.00E+00 | Interneuron     |
| Lrrc7      | 0.00E+00 | 0.572 | 0.496 | 0.018 | 0.00E+00 | Interneuron     |
| Rmst       | 0.00E+00 | 0.554 | 0.413 | 0.008 | 0.00E+00 | Interneuron     |
| Cyld       | 0.00E+00 | 0.544 | 0.552 | 0.088 | 0.00E+00 | Interneuron     |
| Clmp       | 0.00E+00 | 0.486 | 0.421 | 0.051 | 0.00E+00 | Interneuron     |

|          |           |       |       |       |           |             |
|----------|-----------|-------|-------|-------|-----------|-------------|
| Btbd11   | 0.00E+00  | 0.481 | 0.459 | 0.013 | 0.00E+00  | Interneuron |
| Grik3    | 0.00E+00  | 0.455 | 0.421 | 0.004 | 0.00E+00  | Interneuron |
| Pam      | 0.00E+00  | 0.452 | 0.412 | 0.018 | 0.00E+00  | Interneuron |
| Galnt18  | 0.00E+00  | 0.452 | 0.324 | 0.011 | 0.00E+00  | Interneuron |
| Trpc5    | 0.00E+00  | 0.452 | 0.398 | 0.012 | 0.00E+00  | Interneuron |
| Chst9    | 0.00E+00  | 0.450 | 0.314 | 0.005 | 0.00E+00  | Interneuron |
| Frmd3    | 0.00E+00  | 0.449 | 0.381 | 0.039 | 0.00E+00  | Interneuron |
| Nos1ap   | 0.00E+00  | 0.442 | 0.387 | 0.022 | 0.00E+00  | Interneuron |
| Socs2    | 0.00E+00  | 0.439 | 0.376 | 0.012 | 0.00E+00  | Interneuron |
| Ntn1     | 0.00E+00  | 0.435 | 0.371 | 0.003 | 0.00E+00  | Interneuron |
| Tfap2b   | 0.00E+00  | 0.433 | 0.360 | 0.000 | 0.00E+00  | Interneuron |
| Cabp1    | 0.00E+00  | 0.416 | 0.387 | 0.023 | 0.00E+00  | Interneuron |
| Parm1    | 0.00E+00  | 0.409 | 0.339 | 0.004 | 0.00E+00  | Interneuron |
| Grin3a   | 0.00E+00  | 0.397 | 0.275 | 0.011 | 0.00E+00  | Interneuron |
| Gldc     | 0.00E+00  | 0.322 | 0.270 | 0.004 | 0.00E+00  | Interneuron |
| Thrb     | 0.00E+00  | 0.312 | 0.271 | 0.013 | 0.00E+00  | Interneuron |
| Lrtm1    | 0.00E+00  | 0.310 | 0.275 | 0.013 | 0.00E+00  | Interneuron |
| Adamts16 | 0.00E+00  | 0.307 | 0.296 | 0.002 | 0.00E+00  | Interneuron |
| Phf24    | 0.00E+00  | 0.295 | 0.295 | 0.014 | 0.00E+00  | Interneuron |
| Ly6h     | 0.00E+00  | 0.294 | 0.273 | 0.018 | 0.00E+00  | Interneuron |
| Adgrb1   | 0.00E+00  | 0.290 | 0.287 | 0.013 | 0.00E+00  | Interneuron |
| Megf10   | 0.00E+00  | 0.285 | 0.254 | 0.015 | 0.00E+00  | Interneuron |
| Dscaml1  | 1.13E-306 | 0.387 | 0.415 | 0.052 | 2.47E-302 | Interneuron |
| Tbc1d4   | 1.14E-306 | 0.499 | 0.501 | 0.079 | 2.48E-302 | Interneuron |
| Kcna2    | 3.99E-304 | 0.498 | 0.529 | 0.089 | 8.72E-300 | Interneuron |
| Nlgn1    | 5.97E-303 | 1.186 | 0.975 | 0.500 | 1.31E-298 | Interneuron |
| Gm11417  | 1.54E-286 | 0.348 | 0.303 | 0.029 | 3.37E-282 | Interneuron |
| Adgrl3   | 1.16E-284 | 1.350 | 0.783 | 0.267 | 2.54E-280 | Interneuron |
| Eml5     | 1.35E-281 | 0.994 | 0.866 | 0.341 | 2.94E-277 | Interneuron |
| Unc5c1   | 1.27E-279 | 1.165 | 0.959 | 0.546 | 2.77E-275 | Interneuron |
| Mgat4c   | 9.03E-279 | 0.822 | 0.470 | 0.076 | 1.97E-274 | Interneuron |
| Fgf13    | 7.62E-276 | 0.610 | 0.516 | 0.092 | 1.66E-271 | Interneuron |
| Rora     | 1.23E-270 | 1.694 | 0.961 | 0.777 | 2.69E-266 | Interneuron |
| Cntn4    | 1.33E-270 | 1.210 | 0.867 | 0.378 | 2.90E-266 | Interneuron |
| Hcn11    | 4.92E-266 | 1.051 | 0.941 | 0.519 | 1.08E-261 | Interneuron |
| Magi1    | 7.21E-265 | 0.570 | 0.638 | 0.147 | 1.58E-260 | Interneuron |
| Nrxn31   | 1.03E-252 | 0.931 | 0.994 | 0.983 | 2.25E-248 | Interneuron |
| Lsamp1   | 7.07E-237 | 1.043 | 0.994 | 0.807 | 1.54E-232 | Interneuron |
| Mpp7     | 2.30E-229 | 0.469 | 0.473 | 0.090 | 5.04E-225 | Interneuron |
| Gria41   | 3.14E-223 | 0.944 | 0.933 | 0.435 | 6.85E-219 | Interneuron |
| Pid1     | 9.75E-222 | 0.370 | 0.367 | 0.056 | 2.13E-217 | Interneuron |
| Gm26688  | 1.54E-218 | 0.254 | 0.267 | 0.029 | 3.37E-214 | Interneuron |
| Apba2    | 1.15E-214 | 0.436 | 0.474 | 0.096 | 2.52E-210 | Interneuron |
| Asic2    | 1.31E-212 | 0.880 | 0.649 | 0.201 | 2.85E-208 | Interneuron |

|               |           |       |       |       |           |             |
|---------------|-----------|-------|-------|-------|-----------|-------------|
| Elavl4        | 5.14E-203 | 0.309 | 0.335 | 0.050 | 1.12E-198 | Interneuron |
| Serpini1      | 2.69E-194 | 0.367 | 0.368 | 0.063 | 5.88E-190 | Interneuron |
| Rasgrf1       | 3.47E-194 | 0.402 | 0.456 | 0.094 | 7.57E-190 | Interneuron |
| Kirrel31      | 3.25E-192 | 1.029 | 0.914 | 0.478 | 7.11E-188 | Interneuron |
| Ube3a1        | 1.58E-191 | 0.739 | 0.986 | 0.867 | 3.46E-187 | Interneuron |
| Galnt17       | 2.85E-191 | 0.523 | 0.601 | 0.170 | 6.23E-187 | Interneuron |
| 4930517O19Rik | 2.12E-189 | 0.314 | 0.324 | 0.050 | 4.63E-185 | Interneuron |
| Dnah11        | 3.51E-187 | 0.262 | 0.257 | 0.032 | 7.67E-183 | Interneuron |
| Iqsec1        | 4.45E-184 | 0.405 | 0.387 | 0.074 | 9.74E-180 | Interneuron |
| Klf12         | 3.13E-179 | 0.473 | 0.516 | 0.134 | 6.83E-175 | Interneuron |
| Sntg11        | 8.82E-176 | 0.601 | 0.693 | 0.231 | 1.93E-171 | Interneuron |
| Meg31         | 3.80E-174 | 0.647 | 1.000 | 0.966 | 8.32E-170 | Interneuron |
| Atp2b1        | 2.48E-169 | 0.484 | 0.644 | 0.207 | 5.42E-165 | Interneuron |
| Sorbs2os      | 1.70E-168 | 0.397 | 0.429 | 0.096 | 3.71E-164 | Interneuron |
| Sorbs2        | 2.47E-165 | 0.459 | 0.541 | 0.154 | 5.40E-161 | Interneuron |
| Ntrk2         | 1.69E-161 | 0.415 | 0.510 | 0.134 | 3.69E-157 | Interneuron |
| Prkcb1        | 1.32E-158 | 0.463 | 0.596 | 0.185 | 2.88E-154 | Interneuron |
| Efr3b         | 3.49E-155 | 0.295 | 0.332 | 0.062 | 7.64E-151 | Interneuron |
| Xkr4          | 4.04E-155 | 0.721 | 0.802 | 0.399 | 8.84E-151 | Interneuron |
| Syn21         | 1.02E-149 | 0.540 | 0.674 | 0.251 | 2.23E-145 | Interneuron |
| Slc32a1       | 5.93E-149 | 0.267 | 0.304 | 0.055 | 1.30E-144 | Interneuron |
| Neb1          | 9.38E-149 | 0.314 | 0.351 | 0.070 | 2.05E-144 | Interneuron |
| Cnr11         | 4.24E-148 | 0.409 | 0.504 | 0.140 | 9.26E-144 | Interneuron |
| Zfpm21        | 9.15E-148 | 0.732 | 0.832 | 0.426 | 2.00E-143 | Interneuron |
| Tcf41         | 5.15E-143 | 0.557 | 0.828 | 0.363 | 1.13E-138 | Interneuron |
| Plxna4        | 6.32E-139 | 0.547 | 0.577 | 0.204 | 1.38E-134 | Interneuron |
| Dock7         | 1.21E-138 | 0.437 | 0.513 | 0.159 | 2.64E-134 | Interneuron |
| Ahi11         | 1.85E-135 | 0.602 | 0.810 | 0.390 | 4.04E-131 | Interneuron |
| Pkp4          | 2.38E-135 | 0.499 | 0.669 | 0.276 | 5.19E-131 | Interneuron |
| Dcc           | 1.58E-134 | 0.404 | 0.303 | 0.058 | 3.45E-130 | Interneuron |
| Tmtc2         | 2.08E-132 | 0.565 | 0.760 | 0.354 | 4.55E-128 | Interneuron |
| Ccser11       | 1.16E-130 | 0.616 | 0.900 | 0.554 | 2.54E-126 | Interneuron |
| Atp1b1        | 6.44E-130 | 0.528 | 0.775 | 0.371 | 1.41E-125 | Interneuron |
| Dscam1        | 1.23E-125 | 0.509 | 0.697 | 0.299 | 2.68E-121 | Interneuron |
| Tmem117       | 3.20E-120 | 0.337 | 0.382 | 0.100 | 7.00E-116 | Interneuron |
| Mycbp21       | 4.19E-120 | 0.517 | 0.875 | 0.494 | 9.15E-116 | Interneuron |
| Hecw1         | 1.09E-119 | 0.488 | 0.598 | 0.241 | 2.37E-115 | Interneuron |
| Neo1          | 2.16E-119 | 0.314 | 0.417 | 0.114 | 4.72E-115 | Interneuron |
| Gria31        | 1.07E-118 | 0.641 | 0.878 | 0.514 | 2.34E-114 | Interneuron |
| Cdk11         | 6.18E-118 | 0.253 | 0.300 | 0.064 | 1.35E-113 | Interneuron |
| Ptprg         | 2.34E-114 | 0.325 | 0.349 | 0.087 | 5.11E-110 | Interneuron |
| Stard5        | 4.71E-114 | 0.323 | 0.420 | 0.120 | 1.03E-109 | Interneuron |
| Dlgap11       | 9.51E-114 | 0.587 | 0.949 | 0.647 | 2.08E-109 | Interneuron |
| Rph3a         | 4.01E-112 | 0.259 | 0.276 | 0.058 | 8.76E-108 | Interneuron |

|               |           |       |       |       |           |             |
|---------------|-----------|-------|-------|-------|-----------|-------------|
| Atp1a3        | 3.97E-110 | 0.447 | 0.655 | 0.289 | 8.69E-106 | Interneuron |
| C1qtnf4       | 1.86E-109 | 0.418 | 0.571 | 0.223 | 4.06E-105 | Interneuron |
| Erc21         | 2.05E-107 | 0.429 | 0.724 | 0.330 | 4.48E-103 | Interneuron |
| Sgk1          | 9.26E-107 | 0.339 | 0.407 | 0.121 | 2.02E-102 | Interneuron |
| 4933413L06Rik | 1.39E-105 | 0.436 | 0.509 | 0.188 | 3.04E-101 | Interneuron |
| Nav1          | 2.24E-105 | 0.318 | 0.459 | 0.150 | 4.90E-101 | Interneuron |
| Fat3          | 1.07E-104 | 0.328 | 0.407 | 0.122 | 2.33E-100 | Interneuron |
| Srrm41        | 1.28E-104 | 0.339 | 0.507 | 0.173 | 2.79E-100 | Interneuron |
| Clstn1        | 8.25E-103 | 0.280 | 0.343 | 0.090 | 1.80E-98  | Interneuron |
| Zfp5211       | 4.88E-100 | 0.363 | 0.524 | 0.189 | 1.07E-95  | Interneuron |
| Tjp1          | 7.09E-100 | 0.355 | 0.565 | 0.225 | 1.55E-95  | Interneuron |
| Cnpy11        | 3.03E-98  | 0.350 | 0.515 | 0.186 | 6.63E-94  | Interneuron |
| Kcnq3         | 1.09E-97  | 0.271 | 0.303 | 0.074 | 2.39E-93  | Interneuron |
| Npas3         | 1.03E-95  | 0.338 | 0.474 | 0.163 | 2.24E-91  | Interneuron |
| P2ry14        | 1.06E-95  | 0.450 | 0.672 | 0.328 | 2.32E-91  | Interneuron |
| Bcan          | 1.93E-95  | 0.253 | 0.292 | 0.072 | 4.22E-91  | Interneuron |
| Strbp1        | 1.95E-94  | 0.459 | 0.866 | 0.523 | 4.25E-90  | Interneuron |
| Plcb11        | 1.48E-93  | 0.473 | 0.769 | 0.388 | 3.23E-89  | Interneuron |
| Enah          | 1.28E-92  | 0.277 | 0.370 | 0.110 | 2.80E-88  | Interneuron |
| Ptprn2        | 4.24E-90  | 0.332 | 0.463 | 0.166 | 9.26E-86  | Interneuron |
| Cit           | 2.92E-89  | 0.266 | 0.287 | 0.073 | 6.38E-85  | Interneuron |
| Glce          | 6.35E-89  | 0.255 | 0.335 | 0.096 | 1.39E-84  | Interneuron |
| Lrrc4c1       | 5.05E-87  | 0.667 | 0.885 | 0.544 | 1.10E-82  | Interneuron |
| Gm136291      | 2.03E-85  | 0.334 | 0.463 | 0.173 | 4.44E-81  | Interneuron |
| Mgat5         | 1.28E-84  | 0.324 | 0.431 | 0.157 | 2.80E-80  | Interneuron |
| Spock31       | 3.14E-84  | 0.442 | 0.665 | 0.332 | 6.87E-80  | Interneuron |
| Csrnp3        | 1.09E-83  | 0.254 | 0.340 | 0.103 | 2.38E-79  | Interneuron |
| Ttc31         | 1.98E-82  | 0.393 | 0.752 | 0.406 | 4.32E-78  | Interneuron |
| Slc16a111     | 2.02E-82  | 0.271 | 0.392 | 0.129 | 4.42E-78  | Interneuron |
| Gabrg2        | 1.48E-80  | 0.364 | 0.532 | 0.231 | 3.22E-76  | Interneuron |
| Enox1         | 7.50E-80  | 0.327 | 0.507 | 0.210 | 1.64E-75  | Interneuron |
| Pcsk1n        | 1.66E-79  | 0.313 | 0.482 | 0.188 | 3.62E-75  | Interneuron |
| Rtn31         | 2.32E-78  | 0.311 | 0.456 | 0.172 | 5.07E-74  | Interneuron |
| Mdga21        | 7.70E-75  | 0.506 | 0.931 | 0.585 | 1.68E-70  | Interneuron |
| Rab3c         | 9.59E-75  | 0.311 | 0.463 | 0.184 | 2.10E-70  | Interneuron |
| C130071C03Rik | 5.48E-74  | 0.302 | 0.495 | 0.206 | 1.20E-69  | Interneuron |
| Tiam1         | 1.26E-71  | 0.265 | 0.360 | 0.122 | 2.76E-67  | Interneuron |
| Csmd31        | 5.39E-70  | 0.579 | 0.563 | 0.266 | 1.18E-65  | Interneuron |
| Slc12a5       | 5.47E-70  | 0.313 | 0.541 | 0.248 | 1.19E-65  | Interneuron |
| Osbp1a        | 1.26E-69  | 0.266 | 0.417 | 0.162 | 2.75E-65  | Interneuron |
| Atp8a1        | 1.17E-66  | 0.263 | 0.406 | 0.154 | 2.56E-62  | Interneuron |
| Kcnn2         | 4.13E-66  | 0.276 | 0.388 | 0.147 | 9.02E-62  | Interneuron |
| Scn9a         | 7.25E-65  | 0.309 | 0.381 | 0.147 | 1.58E-60  | Interneuron |
| Spock1        | 1.66E-64  | 0.379 | 0.459 | 0.206 | 3.64E-60  | Interneuron |

|             |          |       |       |       |          |             |
|-------------|----------|-------|-------|-------|----------|-------------|
| Foxn31      | 3.08E-64 | 0.302 | 0.624 | 0.307 | 6.74E-60 | Interneuron |
| Klhdc10     | 1.95E-63 | 0.309 | 0.571 | 0.283 | 4.26E-59 | Interneuron |
| Frmd4a1     | 7.95E-63 | 0.401 | 0.920 | 0.611 | 1.74E-58 | Interneuron |
| Prpf4b1     | 1.72E-62 | 0.352 | 0.760 | 0.462 | 3.77E-58 | Interneuron |
| Elmod11     | 2.86E-62 | 0.342 | 0.583 | 0.308 | 6.25E-58 | Interneuron |
| Snhg111     | 9.03E-61 | 0.473 | 0.980 | 0.968 | 1.97E-56 | Interneuron |
| Atp6v0b1    | 3.01E-60 | 0.314 | 0.711 | 0.396 | 6.57E-56 | Interneuron |
| Pld51       | 8.12E-60 | 0.279 | 0.487 | 0.216 | 1.78E-55 | Interneuron |
| Nrxn11      | 9.65E-60 | 0.409 | 0.961 | 0.547 | 2.11E-55 | Interneuron |
| Fam49b      | 2.22E-58 | 0.255 | 0.426 | 0.179 | 4.85E-54 | Interneuron |
| Aff2        | 5.13E-58 | 0.295 | 0.448 | 0.202 | 1.12E-53 | Interneuron |
| Nalcn       | 1.18E-57 | 0.311 | 0.534 | 0.268 | 2.57E-53 | Interneuron |
| Fam155a1    | 1.64E-57 | 0.399 | 0.938 | 0.835 | 3.58E-53 | Interneuron |
| Kif21a      | 3.48E-57 | 0.304 | 0.577 | 0.306 | 7.60E-53 | Interneuron |
| Zbtb201     | 6.25E-56 | 0.383 | 0.697 | 0.394 | 1.37E-51 | Interneuron |
| Me3         | 1.37E-55 | 0.282 | 0.437 | 0.197 | 2.98E-51 | Interneuron |
| Dpp61       | 8.54E-55 | 0.389 | 0.771 | 0.426 | 1.87E-50 | Interneuron |
| Ahcy12      | 1.45E-54 | 0.290 | 0.512 | 0.254 | 3.18E-50 | Interneuron |
| Luzp1       | 6.62E-54 | 0.299 | 0.493 | 0.245 | 1.45E-49 | Interneuron |
| Mettl23     | 1.16E-53 | 0.307 | 0.604 | 0.328 | 2.53E-49 | Interneuron |
| Ank31       | 2.15E-52 | 0.278 | 0.807 | 0.483 | 4.71E-48 | Interneuron |
| Gabra1      | 1.26E-50 | 0.301 | 0.551 | 0.301 | 2.76E-46 | Interneuron |
| Epb41l3     | 1.68E-50 | 0.263 | 0.535 | 0.281 | 3.68E-46 | Interneuron |
| Hunk1       | 8.30E-50 | 0.251 | 0.378 | 0.165 | 1.81E-45 | Interneuron |
| Tnik        | 1.01E-49 | 0.292 | 0.688 | 0.418 | 2.20E-45 | Interneuron |
| Kcnq1ot1    | 1.92E-49 | 0.335 | 0.657 | 0.405 | 4.19E-45 | Interneuron |
| Trpm31      | 4.00E-49 | 0.266 | 0.730 | 0.396 | 8.74E-45 | Interneuron |
| AC149090.11 | 5.23E-49 | 0.308 | 0.685 | 0.413 | 1.14E-44 | Interneuron |
| Rmdn1       | 2.01E-48 | 0.270 | 0.585 | 0.326 | 4.39E-44 | Interneuron |
| Gpr1581     | 4.70E-48 | 0.297 | 0.668 | 0.369 | 1.03E-43 | Interneuron |
| Lhfpl31     | 3.31E-47 | 0.318 | 0.590 | 0.323 | 7.23E-43 | Interneuron |
| Ntm1        | 4.55E-45 | 0.318 | 0.950 | 0.979 | 9.94E-41 | Interneuron |
| Nme7        | 1.14E-44 | 0.264 | 0.440 | 0.219 | 2.49E-40 | Interneuron |
| Amph        | 2.50E-44 | 0.251 | 0.471 | 0.241 | 5.46E-40 | Interneuron |
| Grm3        | 7.73E-44 | 0.274 | 0.304 | 0.125 | 1.69E-39 | Interneuron |
| Srsf2       | 1.28E-43 | 0.263 | 0.477 | 0.252 | 2.79E-39 | Interneuron |
| Slc24a5     | 4.67E-43 | 0.261 | 0.520 | 0.284 | 1.02E-38 | Interneuron |
| Wwox        | 7.89E-43 | 0.349 | 0.587 | 0.364 | 1.73E-38 | Interneuron |
| Gm2163      | 8.82E-41 | 0.292 | 0.382 | 0.187 | 1.93E-36 | Interneuron |
| Gm424181    | 9.25E-41 | 0.259 | 0.858 | 0.557 | 2.02E-36 | Interneuron |
| Pcdh7       | 1.20E-40 | 0.382 | 0.388 | 0.194 | 2.63E-36 | Interneuron |
| Naaladl2    | 2.08E-40 | 0.276 | 0.619 | 0.369 | 4.54E-36 | Interneuron |
| Nrg1        | 2.69E-40 | 0.746 | 0.282 | 0.118 | 5.88E-36 | Interneuron |
| Rbm391      | 7.83E-40 | 0.262 | 0.744 | 0.490 | 1.71E-35 | Interneuron |

|         |          |       |       |       |          |             |
|---------|----------|-------|-------|-------|----------|-------------|
| Arl15   | 1.06E-38 | 0.284 | 0.479 | 0.272 | 2.31E-34 | Interneuron |
| Lrrtm41 | 2.73E-37 | 0.492 | 0.580 | 0.355 | 5.97E-33 | Interneuron |
| Grin1   | 4.15E-37 | 0.259 | 0.577 | 0.349 | 9.07E-33 | Interneuron |
| Ppm1l   | 2.96E-35 | 0.273 | 0.438 | 0.240 | 6.47E-31 | Interneuron |
| Arglu1  | 9.92E-32 | 0.265 | 0.736 | 0.532 | 2.17E-27 | Interneuron |
| Ptptr1  | 1.25E-30 | 0.297 | 0.318 | 0.155 | 2.73E-26 | Interneuron |
| Lrp1b   | 1.40E-29 | 0.517 | 0.869 | 0.837 | 3.07E-25 | Interneuron |
| Gria21  | 1.09E-16 | 0.261 | 0.930 | 0.950 | 2.39E-12 | Interneuron |
| Nrg3    | 8.27E-11 | 0.250 | 0.690 | 0.639 | 1.81E-06 | Interneuron |
| Luzp21  | 0.00E+00 | 1.949 | 0.956 | 0.060 | 0.00E+00 | Glial cell  |
| Apoe    | 0.00E+00 | 1.805 | 0.975 | 0.036 | 0.00E+00 | Glial cell  |
| Gabbr1  | 0.00E+00 | 1.699 | 0.966 | 0.089 | 0.00E+00 | Glial cell  |
| Slc1a3  | 0.00E+00 | 1.656 | 0.846 | 0.016 | 0.00E+00 | Glial cell  |
| Npas31  | 0.00E+00 | 1.650 | 0.966 | 0.154 | 0.00E+00 | Glial cell  |
| Ptprz11 | 0.00E+00 | 1.604 | 0.913 | 0.033 | 0.00E+00 | Glial cell  |
| Wdr171  | 0.00E+00 | 1.591 | 0.926 | 0.276 | 0.00E+00 | Glial cell  |
| Slc4a41 | 0.00E+00 | 1.458 | 0.956 | 0.215 | 0.00E+00 | Glial cell  |
| Gm3764  | 0.00E+00 | 1.331 | 0.903 | 0.072 | 0.00E+00 | Glial cell  |
| Gpm6b   | 0.00E+00 | 1.323 | 0.825 | 0.120 | 0.00E+00 | Glial cell  |
| Prex2   | 0.00E+00 | 1.266 | 0.814 | 0.004 | 0.00E+00 | Glial cell  |
| Atp1a2  | 0.00E+00 | 1.188 | 0.852 | 0.006 | 0.00E+00 | Glial cell  |
| Qk      | 0.00E+00 | 1.184 | 0.907 | 0.154 | 0.00E+00 | Glial cell  |
| Pla2g7  | 0.00E+00 | 1.166 | 0.875 | 0.011 | 0.00E+00 | Glial cell  |
| Sparcl1 | 0.00E+00 | 1.062 | 0.774 | 0.052 | 0.00E+00 | Glial cell  |
| Gsdme   | 0.00E+00 | 1.032 | 0.666 | 0.059 | 0.00E+00 | Glial cell  |
| Sema6d  | 0.00E+00 | 0.968 | 0.674 | 0.044 | 0.00E+00 | Glial cell  |
| Nbl1    | 0.00E+00 | 0.961 | 0.772 | 0.063 | 0.00E+00 | Glial cell  |
| Lama2   | 0.00E+00 | 0.961 | 0.693 | 0.014 | 0.00E+00 | Glial cell  |
| Plpp3   | 0.00E+00 | 0.953 | 0.729 | 0.010 | 0.00E+00 | Glial cell  |
| Gpr3711 | 0.00E+00 | 0.925 | 0.729 | 0.031 | 0.00E+00 | Glial cell  |
| Cdh20   | 0.00E+00 | 0.884 | 0.702 | 0.044 | 0.00E+00 | Glial cell  |
| Slc1a2  | 0.00E+00 | 0.823 | 0.681 | 0.020 | 0.00E+00 | Glial cell  |
| Rorb    | 0.00E+00 | 0.746 | 0.579 | 0.004 | 0.00E+00 | Glial cell  |
| Lrig1   | 0.00E+00 | 0.745 | 0.626 | 0.027 | 0.00E+00 | Glial cell  |
| Grin2b1 | 0.00E+00 | 0.729 | 0.613 | 0.022 | 0.00E+00 | Glial cell  |
| Ttll3   | 0.00E+00 | 0.724 | 0.471 | 0.007 | 0.00E+00 | Glial cell  |
| Zeb2    | 0.00E+00 | 0.705 | 0.537 | 0.042 | 0.00E+00 | Glial cell  |
| Aqp4    | 0.00E+00 | 0.699 | 0.482 | 0.004 | 0.00E+00 | Glial cell  |
| Gabra2  | 0.00E+00 | 0.697 | 0.535 | 0.007 | 0.00E+00 | Glial cell  |
| Mpp6    | 0.00E+00 | 0.665 | 0.539 | 0.025 | 0.00E+00 | Glial cell  |
| Gjc3    | 0.00E+00 | 0.664 | 0.539 | 0.023 | 0.00E+00 | Glial cell  |
| Ptn     | 0.00E+00 | 0.659 | 0.603 | 0.042 | 0.00E+00 | Glial cell  |
| Map2k6  | 0.00E+00 | 0.658 | 0.537 | 0.045 | 0.00E+00 | Glial cell  |
| Eps15   | 0.00E+00 | 0.646 | 0.586 | 0.083 | 0.00E+00 | Glial cell  |

|               |          |       |       |       |          |            |
|---------------|----------|-------|-------|-------|----------|------------|
| Btbd17        | 0.00E+00 | 0.645 | 0.512 | 0.006 | 0.00E+00 | Glial cell |
| Tprkb         | 0.00E+00 | 0.643 | 0.469 | 0.026 | 0.00E+00 | Glial cell |
| Nckap5        | 0.00E+00 | 0.623 | 0.556 | 0.016 | 0.00E+00 | Glial cell |
| Aldh1a1       | 0.00E+00 | 0.616 | 0.444 | 0.003 | 0.00E+00 | Glial cell |
| Rgs20         | 0.00E+00 | 0.607 | 0.535 | 0.028 | 0.00E+00 | Glial cell |
| A2m           | 0.00E+00 | 0.604 | 0.444 | 0.002 | 0.00E+00 | Glial cell |
| Gja1          | 0.00E+00 | 0.602 | 0.471 | 0.004 | 0.00E+00 | Glial cell |
| Plce1         | 0.00E+00 | 0.593 | 0.499 | 0.010 | 0.00E+00 | Glial cell |
| Phkg1         | 0.00E+00 | 0.585 | 0.488 | 0.008 | 0.00E+00 | Glial cell |
| Gsap          | 0.00E+00 | 0.583 | 0.467 | 0.002 | 0.00E+00 | Glial cell |
| 1700047M11Rik | 0.00E+00 | 0.564 | 0.459 | 0.018 | 0.00E+00 | Glial cell |
| Tmem47        | 0.00E+00 | 0.543 | 0.459 | 0.034 | 0.00E+00 | Glial cell |
| Ednrb         | 0.00E+00 | 0.539 | 0.476 | 0.003 | 0.00E+00 | Glial cell |
| Stk32a        | 0.00E+00 | 0.536 | 0.440 | 0.001 | 0.00E+00 | Glial cell |
| Nhs1          | 0.00E+00 | 0.523 | 0.410 | 0.006 | 0.00E+00 | Glial cell |
| Abi3bp        | 0.00E+00 | 0.510 | 0.393 | 0.005 | 0.00E+00 | Glial cell |
| Hepacam       | 0.00E+00 | 0.504 | 0.446 | 0.011 | 0.00E+00 | Glial cell |
| Mybpc1        | 0.00E+00 | 0.503 | 0.256 | 0.003 | 0.00E+00 | Glial cell |
| Gm29478       | 0.00E+00 | 0.501 | 0.397 | 0.017 | 0.00E+00 | Glial cell |
| Fbxl7         | 0.00E+00 | 0.500 | 0.372 | 0.014 | 0.00E+00 | Glial cell |
| S1pr1         | 0.00E+00 | 0.496 | 0.459 | 0.003 | 0.00E+00 | Glial cell |
| Phyhipl       | 0.00E+00 | 0.485 | 0.459 | 0.040 | 0.00E+00 | Glial cell |
| Arhgef26      | 0.00E+00 | 0.462 | 0.406 | 0.010 | 0.00E+00 | Glial cell |
| Pax3          | 0.00E+00 | 0.457 | 0.364 | 0.001 | 0.00E+00 | Glial cell |
| Sox6          | 0.00E+00 | 0.441 | 0.412 | 0.012 | 0.00E+00 | Glial cell |
| Slc7a10       | 0.00E+00 | 0.440 | 0.383 | 0.001 | 0.00E+00 | Glial cell |
| Cpne2         | 0.00E+00 | 0.439 | 0.374 | 0.008 | 0.00E+00 | Glial cell |
| Slc39a12      | 0.00E+00 | 0.427 | 0.372 | 0.004 | 0.00E+00 | Glial cell |
| Greb1l        | 0.00E+00 | 0.420 | 0.342 | 0.018 | 0.00E+00 | Glial cell |
| St3gal4       | 0.00E+00 | 0.419 | 0.383 | 0.022 | 0.00E+00 | Glial cell |
| F3            | 0.00E+00 | 0.411 | 0.347 | 0.003 | 0.00E+00 | Glial cell |
| Bmpr1b        | 0.00E+00 | 0.404 | 0.368 | 0.016 | 0.00E+00 | Glial cell |
| Tnc           | 0.00E+00 | 0.400 | 0.275 | 0.002 | 0.00E+00 | Glial cell |
| Emid1         | 0.00E+00 | 0.378 | 0.326 | 0.003 | 0.00E+00 | Glial cell |
| Sash1         | 0.00E+00 | 0.366 | 0.345 | 0.018 | 0.00E+00 | Glial cell |
| Nwd1          | 0.00E+00 | 0.364 | 0.332 | 0.008 | 0.00E+00 | Glial cell |
| Gm48742       | 0.00E+00 | 0.363 | 0.307 | 0.017 | 0.00E+00 | Glial cell |
| Dao           | 0.00E+00 | 0.357 | 0.347 | 0.003 | 0.00E+00 | Glial cell |
| Sncap         | 0.00E+00 | 0.350 | 0.315 | 0.013 | 0.00E+00 | Glial cell |
| Tcf7l2        | 0.00E+00 | 0.349 | 0.321 | 0.004 | 0.00E+00 | Glial cell |
| Adcy2         | 0.00E+00 | 0.343 | 0.315 | 0.011 | 0.00E+00 | Glial cell |
| Plscr4        | 0.00E+00 | 0.342 | 0.300 | 0.002 | 0.00E+00 | Glial cell |
| Cd9           | 0.00E+00 | 0.327 | 0.326 | 0.018 | 0.00E+00 | Glial cell |
| Acsbg1        | 0.00E+00 | 0.323 | 0.294 | 0.001 | 0.00E+00 | Glial cell |



|               |           |       |       |       |           |            |
|---------------|-----------|-------|-------|-------|-----------|------------|
| Rmst1         | 0.00E+00  | 0.322 | 0.266 | 0.015 | 0.00E+00  | Glial cell |
| Plekhg1       | 0.00E+00  | 0.322 | 0.309 | 0.019 | 0.00E+00  | Glial cell |
| Sned1         | 0.00E+00  | 0.318 | 0.313 | 0.021 | 0.00E+00  | Glial cell |
| Tlcd1         | 0.00E+00  | 0.315 | 0.290 | 0.003 | 0.00E+00  | Glial cell |
| Id4           | 0.00E+00  | 0.309 | 0.302 | 0.016 | 0.00E+00  | Glial cell |
| Rfx4          | 0.00E+00  | 0.309 | 0.288 | 0.002 | 0.00E+00  | Glial cell |
| Dock1         | 0.00E+00  | 0.294 | 0.271 | 0.011 | 0.00E+00  | Glial cell |
| Prex1         | 0.00E+00  | 0.293 | 0.283 | 0.005 | 0.00E+00  | Glial cell |
| Mertk         | 0.00E+00  | 0.292 | 0.275 | 0.003 | 0.00E+00  | Glial cell |
| Camk2g        | 0.00E+00  | 0.284 | 0.296 | 0.019 | 0.00E+00  | Glial cell |
| E130114P18Rik | 0.00E+00  | 0.278 | 0.296 | 0.016 | 0.00E+00  | Glial cell |
| Clic4         | 0.00E+00  | 0.276 | 0.264 | 0.015 | 0.00E+00  | Glial cell |
| Col9a3        | 0.00E+00  | 0.276 | 0.262 | 0.005 | 0.00E+00  | Glial cell |
| Ddo           | 0.00E+00  | 0.266 | 0.258 | 0.008 | 0.00E+00  | Glial cell |
| Gabra4        | 1.59E-296 | 0.308 | 0.304 | 0.022 | 3.48E-292 | Glial cell |
| Dtna          | 1.04E-294 | 0.906 | 0.789 | 0.184 | 2.27E-290 | Glial cell |
| Thrb1         | 3.34E-289 | 0.275 | 0.260 | 0.016 | 7.29E-285 | Glial cell |
| Cd81          | 2.18E-288 | 0.903 | 0.740 | 0.161 | 4.76E-284 | Glial cell |
| Adgrl31       | 1.55E-276 | 1.262 | 0.875 | 0.269 | 3.38E-272 | Glial cell |
| Pitpnc1       | 3.81E-253 | 0.482 | 0.400 | 0.046 | 8.32E-249 | Glial cell |
| Alcam         | 1.40E-251 | 0.370 | 0.340 | 0.033 | 3.05E-247 | Glial cell |
| Trps1         | 5.25E-250 | 0.878 | 0.738 | 0.185 | 1.15E-245 | Glial cell |
| Trpm32        | 4.96E-248 | 1.291 | 0.962 | 0.393 | 1.09E-243 | Glial cell |
| Ptch1         | 4.40E-237 | 0.600 | 0.522 | 0.088 | 9.61E-233 | Glial cell |
| Atp1b2        | 1.23E-233 | 0.472 | 0.457 | 0.065 | 2.69E-229 | Glial cell |
| Cpq           | 2.58E-225 | 0.294 | 0.271 | 0.023 | 5.63E-221 | Glial cell |
| Glud1         | 2.66E-223 | 0.505 | 0.505 | 0.085 | 5.82E-219 | Glial cell |
| Slc38a1       | 8.18E-223 | 0.575 | 0.579 | 0.113 | 1.79E-218 | Glial cell |
| Asrgl1        | 7.16E-222 | 0.301 | 0.294 | 0.028 | 1.57E-217 | Glial cell |
| Dpyd          | 1.49E-219 | 0.277 | 0.266 | 0.023 | 3.27E-215 | Glial cell |
| Them4         | 6.16E-219 | 0.325 | 0.313 | 0.032 | 1.35E-214 | Glial cell |
| Cdh10         | 4.03E-210 | 0.575 | 0.558 | 0.106 | 8.80E-206 | Glial cell |
| Ttyh1         | 2.90E-207 | 0.485 | 0.539 | 0.103 | 6.33E-203 | Glial cell |
| Lsamp2        | 1.76E-205 | 1.135 | 0.996 | 0.809 | 3.84E-201 | Glial cell |
| Igsf8         | 1.04E-203 | 0.371 | 0.387 | 0.053 | 2.27E-199 | Glial cell |
| Timp4         | 5.38E-197 | 0.304 | 0.307 | 0.034 | 1.18E-192 | Glial cell |
| Cdh4          | 4.65E-196 | 0.317 | 0.288 | 0.030 | 1.02E-191 | Glial cell |
| Cdk5rap2      | 1.51E-195 | 0.324 | 0.332 | 0.041 | 3.30E-191 | Glial cell |
| Ctnnd21       | 1.04E-175 | 0.937 | 0.949 | 0.592 | 2.28E-171 | Glial cell |
| Pik3r1        | 4.50E-172 | 0.374 | 0.353 | 0.052 | 9.84E-168 | Glial cell |
| Hdac8         | 4.28E-171 | 0.799 | 0.753 | 0.284 | 9.36E-167 | Glial cell |
| AC154683.1    | 4.17E-170 | 0.437 | 0.474 | 0.092 | 9.11E-166 | Glial cell |
| Son1          | 3.70E-168 | 0.851 | 0.924 | 0.498 | 8.09E-164 | Glial cell |
| Bach2         | 5.74E-168 | 0.320 | 0.334 | 0.047 | 1.25E-163 | Glial cell |

|                |           |       |       |       |           |            |
|----------------|-----------|-------|-------|-------|-----------|------------|
| Enah1          | 5.57E-165 | 0.456 | 0.507 | 0.109 | 1.22E-160 | Glial cell |
| Gria42         | 7.48E-162 | 1.595 | 0.852 | 0.441 | 1.64E-157 | Glial cell |
| Sept4          | 1.21E-161 | 0.540 | 0.469 | 0.098 | 2.63E-157 | Glial cell |
| Zbtb202        | 1.65E-159 | 0.830 | 0.882 | 0.393 | 3.60E-155 | Glial cell |
| Paqr8          | 4.21E-158 | 0.317 | 0.321 | 0.046 | 9.21E-154 | Glial cell |
| Ank2           | 7.41E-157 | 1.581 | 0.945 | 0.826 | 1.62E-152 | Glial cell |
| Acsl3          | 1.91E-152 | 0.352 | 0.307 | 0.044 | 4.17E-148 | Glial cell |
| Prdx6          | 7.53E-150 | 0.281 | 0.309 | 0.045 | 1.65E-145 | Glial cell |
| C130071C03Rik1 | 7.76E-150 | 0.567 | 0.662 | 0.204 | 1.70E-145 | Glial cell |
| Gria11         | 4.57E-149 | 1.322 | 0.691 | 0.296 | 9.98E-145 | Glial cell |
| Plcb12         | 9.22E-147 | 0.771 | 0.888 | 0.388 | 2.02E-142 | Glial cell |
| Sat1           | 1.09E-139 | 0.478 | 0.507 | 0.126 | 2.38E-135 | Glial cell |
| Nfia1          | 2.04E-139 | 0.652 | 0.744 | 0.271 | 4.46E-135 | Glial cell |
| Slc6a11        | 7.66E-136 | 0.284 | 0.315 | 0.050 | 1.67E-131 | Glial cell |
| Myo161         | 2.88E-131 | 0.380 | 0.383 | 0.076 | 6.30E-127 | Glial cell |
| Cep85l         | 3.16E-130 | 0.388 | 0.436 | 0.098 | 6.91E-126 | Glial cell |
| 4930402H24Rik  | 9.01E-128 | 0.680 | 0.767 | 0.345 | 1.97E-123 | Glial cell |
| Nlgn11         | 3.89E-124 | 0.758 | 0.928 | 0.505 | 8.51E-120 | Glial cell |
| Gm9925         | 4.80E-124 | 0.254 | 0.264 | 0.039 | 1.05E-119 | Glial cell |
| Usp53          | 8.18E-122 | 0.344 | 0.362 | 0.072 | 1.79E-117 | Glial cell |
| Pcdh71         | 1.65E-118 | 0.563 | 0.592 | 0.190 | 3.61E-114 | Glial cell |
| Appl2          | 2.83E-118 | 0.413 | 0.463 | 0.119 | 6.19E-114 | Glial cell |
| Farp1          | 1.38E-116 | 0.392 | 0.385 | 0.085 | 3.01E-112 | Glial cell |
| Clybl          | 1.53E-116 | 0.399 | 0.410 | 0.097 | 3.35E-112 | Glial cell |
| Maml21         | 3.02E-116 | 0.491 | 0.518 | 0.147 | 6.61E-112 | Glial cell |
| Phlpp1         | 5.74E-116 | 0.466 | 0.548 | 0.164 | 1.25E-111 | Glial cell |
| Sfxn5          | 6.50E-116 | 0.481 | 0.533 | 0.163 | 1.42E-111 | Glial cell |
| Scg3           | 2.26E-115 | 0.342 | 0.374 | 0.080 | 4.93E-111 | Glial cell |
| Kcnn21         | 3.89E-115 | 0.437 | 0.514 | 0.146 | 8.51E-111 | Glial cell |
| Ophn1          | 7.04E-112 | 0.315 | 0.313 | 0.059 | 1.54E-107 | Glial cell |
| Fmn2           | 4.14E-108 | 0.540 | 0.653 | 0.260 | 9.04E-104 | Glial cell |
| Ust            | 1.26E-105 | 0.500 | 0.444 | 0.122 | 2.75E-101 | Glial cell |
| Cst3           | 8.36E-100 | 0.551 | 0.613 | 0.227 | 1.83E-95  | Glial cell |
| Gpc61          | 4.00E-97  | 0.739 | 0.793 | 0.413 | 8.75E-93  | Glial cell |
| Grk3           | 5.01E-97  | 0.269 | 0.290 | 0.057 | 1.10E-92  | Glial cell |
| Cdh22          | 1.65E-96  | 0.263 | 0.254 | 0.045 | 3.60E-92  | Glial cell |
| Neo11          | 1.37E-94  | 0.345 | 0.425 | 0.117 | 3.00E-90  | Glial cell |
| Zic4           | 2.12E-92  | 0.298 | 0.304 | 0.065 | 4.64E-88  | Glial cell |
| Htra1          | 6.47E-91  | 0.320 | 0.374 | 0.096 | 1.41E-86  | Glial cell |
| Myo6           | 2.39E-87  | 0.424 | 0.505 | 0.174 | 5.23E-83  | Glial cell |
| Chpt1          | 6.32E-86  | 0.348 | 0.387 | 0.108 | 1.38E-81  | Glial cell |
| Pard3b         | 2.04E-82  | 0.365 | 0.442 | 0.137 | 4.46E-78  | Glial cell |
| Phka1          | 7.57E-81  | 0.314 | 0.330 | 0.084 | 1.65E-76  | Glial cell |
| Cthrc1         | 7.73E-81  | 0.388 | 0.419 | 0.130 | 1.69E-76  | Glial cell |

|           |          |       |       |       |          |            |
|-----------|----------|-------|-------|-------|----------|------------|
| Tle4      | 4.11E-80 | 0.306 | 0.340 | 0.089 | 8.98E-76 | Glial cell |
| Xylt1     | 9.78E-78 | 0.323 | 0.357 | 0.099 | 2.14E-73 | Glial cell |
| Ctsl      | 3.05E-75 | 0.331 | 0.440 | 0.144 | 6.67E-71 | Glial cell |
| Rfx3      | 1.90E-72 | 0.311 | 0.383 | 0.116 | 4.15E-68 | Glial cell |
| Mcc       | 1.38E-70 | 0.319 | 0.416 | 0.134 | 3.01E-66 | Glial cell |
| Scd2      | 6.09E-70 | 0.329 | 0.387 | 0.122 | 1.33E-65 | Glial cell |
| Fat31     | 6.88E-67 | 0.326 | 0.387 | 0.125 | 1.50E-62 | Glial cell |
| Hnrnpa2b1 | 7.49E-65 | 0.432 | 0.622 | 0.304 | 1.64E-60 | Glial cell |
| Hopx      | 8.61E-65 | 0.280 | 0.311 | 0.089 | 1.88E-60 | Glial cell |
| Pcdh9     | 4.27E-60 | 0.340 | 0.998 | 0.989 | 9.34E-56 | Glial cell |
| Ncam2     | 9.12E-60 | 0.496 | 0.706 | 0.394 | 1.99E-55 | Glial cell |
| Gm424182  | 5.45E-59 | 0.440 | 0.896 | 0.558 | 1.19E-54 | Glial cell |
| Dclk1     | 3.16E-58 | 0.458 | 0.634 | 0.344 | 6.92E-54 | Glial cell |
| Agpat5    | 9.20E-58 | 0.266 | 0.332 | 0.105 | 2.01E-53 | Glial cell |
| Spag9     | 2.09E-57 | 0.395 | 0.628 | 0.321 | 4.57E-53 | Glial cell |
| Abi1      | 9.09E-54 | 0.268 | 0.307 | 0.096 | 1.99E-49 | Glial cell |
| Samd4     | 2.69E-52 | 0.344 | 0.381 | 0.144 | 5.87E-48 | Glial cell |
| Bmpr1a    | 2.75E-49 | 0.291 | 0.438 | 0.183 | 6.01E-45 | Glial cell |
| Ntrk21    | 3.93E-49 | 0.250 | 0.381 | 0.141 | 8.60E-45 | Glial cell |
| Arhgef12  | 2.49E-48 | 0.333 | 0.452 | 0.199 | 5.45E-44 | Glial cell |
| Adk       | 4.17E-48 | 0.268 | 0.385 | 0.149 | 9.11E-44 | Glial cell |
| Pde7b1    | 2.19E-46 | 0.317 | 0.383 | 0.155 | 4.78E-42 | Glial cell |
| Nfib1     | 4.09E-46 | 0.338 | 0.596 | 0.295 | 8.94E-42 | Glial cell |
| Nrcam     | 5.74E-45 | 0.396 | 0.624 | 0.362 | 1.25E-40 | Glial cell |
| Mgat4c1   | 7.77E-45 | 0.276 | 0.266 | 0.084 | 1.70E-40 | Glial cell |
| Gab2      | 4.22E-44 | 0.277 | 0.353 | 0.137 | 9.23E-40 | Glial cell |
| Fry       | 4.49E-44 | 0.411 | 0.636 | 0.381 | 9.82E-40 | Glial cell |
| Macf11    | 2.34E-42 | 0.384 | 0.818 | 0.643 | 5.12E-38 | Glial cell |
| Ssbp2     | 1.14E-38 | 0.277 | 0.438 | 0.208 | 2.49E-34 | Glial cell |
| Tcf12     | 4.89E-38 | 0.305 | 0.537 | 0.281 | 1.07E-33 | Glial cell |
| Kansl1l   | 6.13E-36 | 0.338 | 0.537 | 0.303 | 1.34E-31 | Glial cell |
| Tnik1     | 4.82E-35 | 0.326 | 0.643 | 0.421 | 1.05E-30 | Glial cell |
| Arglu11   | 1.67E-34 | 0.361 | 0.729 | 0.534 | 3.65E-30 | Glial cell |
| Dip2b1    | 7.03E-34 | 0.271 | 0.486 | 0.249 | 1.54E-29 | Glial cell |
| Nav3      | 1.23E-33 | 0.357 | 0.641 | 0.392 | 2.68E-29 | Glial cell |
| Tcf42     | 1.89E-33 | 0.265 | 0.668 | 0.371 | 4.14E-29 | Glial cell |
| Itm2b1    | 1.36E-32 | 0.296 | 0.822 | 0.559 | 2.97E-28 | Glial cell |
| Ppp2r2b   | 1.01E-31 | 0.288 | 0.442 | 0.229 | 2.21E-27 | Glial cell |
| Nf1       | 7.47E-31 | 0.274 | 0.433 | 0.227 | 1.63E-26 | Glial cell |
| Zfp608    | 5.85E-30 | 0.314 | 0.444 | 0.242 | 1.28E-25 | Glial cell |
| Gpm6a1    | 8.03E-29 | 0.260 | 0.603 | 0.359 | 1.76E-24 | Glial cell |
| Fgfr2     | 1.02E-28 | 0.317 | 0.662 | 0.454 | 2.23E-24 | Glial cell |
| Grid21    | 1.10E-25 | 0.322 | 1.000 | 0.994 | 2.40E-21 | Glial cell |
| Osbpl9    | 2.75E-25 | 0.290 | 0.457 | 0.270 | 6.01E-21 | Glial cell |

|                |          |       |       |       |          |                 |
|----------------|----------|-------|-------|-------|----------|-----------------|
| Chd91          | 4.20E-24 | 0.279 | 0.617 | 0.428 | 9.18E-20 | Glial cell      |
| Prpf4b2        | 1.19E-23 | 0.266 | 0.660 | 0.466 | 2.60E-19 | Glial cell      |
| Ncam11         | 7.71E-23 | 0.261 | 0.617 | 0.422 | 1.69E-18 | Glial cell      |
| Arhgap51       | 3.23E-21 | 0.271 | 0.734 | 0.534 | 7.05E-17 | Glial cell      |
| Cntn11         | 5.17E-17 | 0.282 | 0.554 | 0.398 | 1.13E-12 | Glial cell      |
| B3galt1        | 1.77E-15 | 0.281 | 0.575 | 0.440 | 3.86E-11 | Glial cell      |
| Nkain21        | 0.00E+00 | 2.808 | 0.923 | 0.135 | 0.00E+00 | Oligodendrocyte |
| Plp1           | 0.00E+00 | 2.417 | 0.926 | 0.037 | 0.00E+00 | Oligodendrocyte |
| Qk1            | 0.00E+00 | 1.932 | 0.965 | 0.150 | 0.00E+00 | Oligodendrocyte |
| Mbp            | 0.00E+00 | 1.714 | 0.858 | 0.017 | 0.00E+00 | Oligodendrocyte |
| Dock10         | 0.00E+00 | 1.593 | 0.884 | 0.007 | 0.00E+00 | Oligodendrocyte |
| St18           | 0.00E+00 | 1.539 | 0.869 | 0.172 | 0.00E+00 | Oligodendrocyte |
| Slc24a21       | 0.00E+00 | 1.451 | 0.852 | 0.236 | 0.00E+00 | Oligodendrocyte |
| Pex5l          | 0.00E+00 | 1.436 | 0.790 | 0.011 | 0.00E+00 | Oligodendrocyte |
| Mog            | 0.00E+00 | 1.368 | 0.788 | 0.007 | 0.00E+00 | Oligodendrocyte |
| Zeb21          | 0.00E+00 | 1.238 | 0.847 | 0.032 | 0.00E+00 | Oligodendrocyte |
| Plcl1          | 0.00E+00 | 1.196 | 0.768 | 0.020 | 0.00E+00 | Oligodendrocyte |
| Mag            | 0.00E+00 | 1.169 | 0.784 | 0.005 | 0.00E+00 | Oligodendrocyte |
| Neat1          | 0.00E+00 | 1.160 | 0.644 | 0.010 | 0.00E+00 | Oligodendrocyte |
| Rnf220         | 0.00E+00 | 1.150 | 0.720 | 0.036 | 0.00E+00 | Oligodendrocyte |
| Gjc31          | 0.00E+00 | 1.125 | 0.810 | 0.014 | 0.00E+00 | Oligodendrocyte |
| Tubb4a         | 0.00E+00 | 1.120 | 0.843 | 0.189 | 0.00E+00 | Oligodendrocyte |
| Aspa           | 0.00E+00 | 1.114 | 0.732 | 0.003 | 0.00E+00 | Oligodendrocyte |
| Enpp2          | 0.00E+00 | 1.082 | 0.766 | 0.012 | 0.00E+00 | Oligodendrocyte |
| Phlpp11        | 0.00E+00 | 0.986 | 0.806 | 0.155 | 0.00E+00 | Oligodendrocyte |
| Aplp1          | 0.00E+00 | 0.982 | 0.766 | 0.087 | 0.00E+00 | Oligodendrocyte |
| Prr5l          | 0.00E+00 | 0.956 | 0.618 | 0.002 | 0.00E+00 | Oligodendrocyte |
| Cdh201         | 0.00E+00 | 0.900 | 0.690 | 0.042 | 0.00E+00 | Oligodendrocyte |
| Mast3          | 0.00E+00 | 0.871 | 0.625 | 0.011 | 0.00E+00 | Oligodendrocyte |
| Gpm6b1         | 0.00E+00 | 0.865 | 0.771 | 0.119 | 0.00E+00 | Oligodendrocyte |
| Mal            | 0.00E+00 | 0.863 | 0.600 | 0.013 | 0.00E+00 | Oligodendrocyte |
| Hapln2         | 0.00E+00 | 0.841 | 0.570 | 0.001 | 0.00E+00 | Oligodendrocyte |
| Map7           | 0.00E+00 | 0.829 | 0.670 | 0.054 | 0.00E+00 | Oligodendrocyte |
| Sox10          | 0.00E+00 | 0.826 | 0.649 | 0.000 | 0.00E+00 | Oligodendrocyte |
| Dcc1           | 0.00E+00 | 0.824 | 0.565 | 0.052 | 0.00E+00 | Oligodendrocyte |
| Ugt8a          | 0.00E+00 | 0.819 | 0.668 | 0.035 | 0.00E+00 | Oligodendrocyte |
| 1700047M11Rik1 | 0.00E+00 | 0.812 | 0.640 | 0.012 | 0.00E+00 | Oligodendrocyte |
| Gatm           | 0.00E+00 | 0.802 | 0.598 | 0.004 | 0.00E+00 | Oligodendrocyte |
| Cdh101         | 0.00E+00 | 0.796 | 0.655 | 0.102 | 0.00E+00 | Oligodendrocyte |
| Bcas1          | 0.00E+00 | 0.776 | 0.559 | 0.001 | 0.00E+00 | Oligodendrocyte |
| Pacrg          | 0.00E+00 | 0.752 | 0.635 | 0.088 | 0.00E+00 | Oligodendrocyte |
| A330049N07Rik  | 0.00E+00 | 0.746 | 0.500 | 0.001 | 0.00E+00 | Oligodendrocyte |
| Shisa4         | 0.00E+00 | 0.730 | 0.592 | 0.051 | 0.00E+00 | Oligodendrocyte |
| Scd21          | 0.00E+00 | 0.722 | 0.659 | 0.114 | 0.00E+00 | Oligodendrocyte |

|               |          |       |       |       |          |                 |
|---------------|----------|-------|-------|-------|----------|-----------------|
| March1        | 0.00E+00 | 0.713 | 0.474 | 0.025 | 0.00E+00 | Oligodendrocyte |
| Robo1         | 0.00E+00 | 0.713 | 0.528 | 0.056 | 0.00E+00 | Oligodendrocyte |
| Klhl2         | 0.00E+00 | 0.713 | 0.587 | 0.048 | 0.00E+00 | Oligodendrocyte |
| Mobp          | 0.00E+00 | 0.686 | 0.485 | 0.001 | 0.00E+00 | Oligodendrocyte |
| Cldn11        | 0.00E+00 | 0.682 | 0.526 | 0.009 | 0.00E+00 | Oligodendrocyte |
| Plekhg11      | 0.00E+00 | 0.673 | 0.544 | 0.011 | 0.00E+00 | Oligodendrocyte |
| Cdh19         | 0.00E+00 | 0.667 | 0.518 | 0.005 | 0.00E+00 | Oligodendrocyte |
| Car2          | 0.00E+00 | 0.643 | 0.522 | 0.048 | 0.00E+00 | Oligodendrocyte |
| Ptprk1        | 0.00E+00 | 0.630 | 0.572 | 0.028 | 0.00E+00 | Oligodendrocyte |
| Litaf         | 0.00E+00 | 0.629 | 0.482 | 0.005 | 0.00E+00 | Oligodendrocyte |
| Aatk          | 0.00E+00 | 0.608 | 0.581 | 0.065 | 0.00E+00 | Oligodendrocyte |
| Sec14l5       | 0.00E+00 | 0.601 | 0.487 | 0.001 | 0.00E+00 | Oligodendrocyte |
| Sorcs1        | 0.00E+00 | 0.583 | 0.506 | 0.039 | 0.00E+00 | Oligodendrocyte |
| Apod          | 0.00E+00 | 0.581 | 0.463 | 0.008 | 0.00E+00 | Oligodendrocyte |
| Plekhh1       | 0.00E+00 | 0.575 | 0.494 | 0.005 | 0.00E+00 | Oligodendrocyte |
| 4930419G24Rik | 0.00E+00 | 0.574 | 0.410 | 0.003 | 0.00E+00 | Oligodendrocyte |
| Fa2h          | 0.00E+00 | 0.570 | 0.511 | 0.022 | 0.00E+00 | Oligodendrocyte |
| Frmd4b        | 0.00E+00 | 0.567 | 0.485 | 0.028 | 0.00E+00 | Oligodendrocyte |
| Gsn           | 0.00E+00 | 0.566 | 0.461 | 0.003 | 0.00E+00 | Oligodendrocyte |
| Erbin         | 0.00E+00 | 0.562 | 0.467 | 0.012 | 0.00E+00 | Oligodendrocyte |
| Sytl2         | 0.00E+00 | 0.558 | 0.437 | 0.017 | 0.00E+00 | Oligodendrocyte |
| Ptn1          | 0.00E+00 | 0.552 | 0.494 | 0.043 | 0.00E+00 | Oligodendrocyte |
| Hcn2          | 0.00E+00 | 0.542 | 0.454 | 0.038 | 0.00E+00 | Oligodendrocyte |
| Stxbp6        | 0.00E+00 | 0.512 | 0.413 | 0.007 | 0.00E+00 | Oligodendrocyte |
| Elovl7        | 0.00E+00 | 0.510 | 0.437 | 0.015 | 0.00E+00 | Oligodendrocyte |
| Ernm          | 0.00E+00 | 0.503 | 0.423 | 0.001 | 0.00E+00 | Oligodendrocyte |
| Smad7         | 0.00E+00 | 0.501 | 0.432 | 0.042 | 0.00E+00 | Oligodendrocyte |
| AC110241.2    | 0.00E+00 | 0.488 | 0.341 | 0.001 | 0.00E+00 | Oligodendrocyte |
| Gm16168       | 0.00E+00 | 0.486 | 0.430 | 0.028 | 0.00E+00 | Oligodendrocyte |
| Clic41        | 0.00E+00 | 0.472 | 0.399 | 0.010 | 0.00E+00 | Oligodendrocyte |
| Gab1          | 0.00E+00 | 0.452 | 0.387 | 0.020 | 0.00E+00 | Oligodendrocyte |
| Anln          | 0.00E+00 | 0.449 | 0.341 | 0.003 | 0.00E+00 | Oligodendrocyte |
| Agpat4        | 0.00E+00 | 0.446 | 0.421 | 0.040 | 0.00E+00 | Oligodendrocyte |
| Gm37459       | 0.00E+00 | 0.435 | 0.352 | 0.002 | 0.00E+00 | Oligodendrocyte |
| Trim59        | 0.00E+00 | 0.430 | 0.375 | 0.006 | 0.00E+00 | Oligodendrocyte |
| Ddr1          | 0.00E+00 | 0.421 | 0.404 | 0.043 | 0.00E+00 | Oligodendrocyte |
| Slain1        | 0.00E+00 | 0.421 | 0.397 | 0.021 | 0.00E+00 | Oligodendrocyte |
| Phldb1        | 0.00E+00 | 0.414 | 0.371 | 0.018 | 0.00E+00 | Oligodendrocyte |
| Pde8a         | 0.00E+00 | 0.402 | 0.354 | 0.008 | 0.00E+00 | Oligodendrocyte |
| Gm42413       | 0.00E+00 | 0.384 | 0.356 | 0.024 | 0.00E+00 | Oligodendrocyte |
| Rfl           | 0.00E+00 | 0.373 | 0.349 | 0.015 | 0.00E+00 | Oligodendrocyte |
| Mob3b         | 0.00E+00 | 0.367 | 0.295 | 0.008 | 0.00E+00 | Oligodendrocyte |
| Tmbim1        | 0.00E+00 | 0.364 | 0.332 | 0.016 | 0.00E+00 | Oligodendrocyte |
| Enpp6         | 0.00E+00 | 0.358 | 0.269 | 0.003 | 0.00E+00 | Oligodendrocyte |

|            |           |       |       |       |           |                 |
|------------|-----------|-------|-------|-------|-----------|-----------------|
| Sox8       | 0.00E+00  | 0.350 | 0.293 | 0.004 | 0.00E+00  | Oligodendrocyte |
| Gm487421   | 0.00E+00  | 0.344 | 0.282 | 0.017 | 0.00E+00  | Oligodendrocyte |
| Rasgrp3    | 0.00E+00  | 0.333 | 0.262 | 0.001 | 0.00E+00  | Oligodendrocyte |
| Msmo1      | 0.00E+00  | 0.331 | 0.297 | 0.018 | 0.00E+00  | Oligodendrocyte |
| Tmeff1     | 0.00E+00  | 0.329 | 0.304 | 0.007 | 0.00E+00  | Oligodendrocyte |
| Ppp1r14a   | 0.00E+00  | 0.326 | 0.293 | 0.002 | 0.00E+00  | Oligodendrocyte |
| Wipf1      | 0.00E+00  | 0.323 | 0.314 | 0.021 | 0.00E+00  | Oligodendrocyte |
| Glul       | 0.00E+00  | 0.317 | 0.284 | 0.008 | 0.00E+00  | Oligodendrocyte |
| Pik3c2b    | 0.00E+00  | 0.315 | 0.293 | 0.008 | 0.00E+00  | Oligodendrocyte |
| Dock11     | 0.00E+00  | 0.313 | 0.295 | 0.009 | 0.00E+00  | Oligodendrocyte |
| Hepacam1   | 0.00E+00  | 0.305 | 0.306 | 0.013 | 0.00E+00  | Oligodendrocyte |
| Gal3st1    | 0.00E+00  | 0.286 | 0.271 | 0.002 | 0.00E+00  | Oligodendrocyte |
| Cobll1     | 0.00E+00  | 0.284 | 0.260 | 0.009 | 0.00E+00  | Oligodendrocyte |
| Cmtm5      | 0.00E+00  | 0.283 | 0.273 | 0.008 | 0.00E+00  | Oligodendrocyte |
| Megf101    | 0.00E+00  | 0.282 | 0.286 | 0.015 | 0.00E+00  | Oligodendrocyte |
| Lpar1      | 0.00E+00  | 0.279 | 0.251 | 0.004 | 0.00E+00  | Oligodendrocyte |
| Plip       | 0.00E+00  | 0.269 | 0.266 | 0.003 | 0.00E+00  | Oligodendrocyte |
| Wscd1      | 0.00E+00  | 0.268 | 0.273 | 0.015 | 0.00E+00  | Oligodendrocyte |
| St6gal1    | 0.00E+00  | 0.267 | 0.262 | 0.011 | 0.00E+00  | Oligodendrocyte |
| St6galnac3 | 6.64E-306 | 0.799 | 0.707 | 0.153 | 1.45E-301 | Oligodendrocyte |
| Kcnq31     | 2.64E-302 | 0.536 | 0.506 | 0.070 | 5.77E-298 | Oligodendrocyte |
| Ypel2      | 1.76E-299 | 0.513 | 0.428 | 0.051 | 3.86E-295 | Oligodendrocyte |
| Fth1       | 2.34E-292 | 0.578 | 0.511 | 0.076 | 5.10E-288 | Oligodendrocyte |
| Cdk19      | 1.71E-285 | 0.603 | 0.537 | 0.087 | 3.74E-281 | Oligodendrocyte |
| Pde4b1     | 1.02E-282 | 1.336 | 0.959 | 0.390 | 2.24E-278 | Oligodendrocyte |
| Edil31     | 1.96E-282 | 1.096 | 0.865 | 0.297 | 4.29E-278 | Oligodendrocyte |
| Cd91       | 1.29E-278 | 0.460 | 0.258 | 0.018 | 2.82E-274 | Oligodendrocyte |
| Sept7      | 1.37E-275 | 0.822 | 0.731 | 0.187 | 2.99E-271 | Oligodendrocyte |
| Creb5      | 7.23E-275 | 0.443 | 0.411 | 0.050 | 1.58E-270 | Oligodendrocyte |
| Tmeff2     | 1.11E-270 | 1.594 | 0.915 | 0.451 | 2.42E-266 | Oligodendrocyte |
| Slc12a2    | 2.52E-267 | 0.593 | 0.572 | 0.104 | 5.51E-263 | Oligodendrocyte |
| Prickle2   | 4.78E-267 | 0.682 | 0.601 | 0.120 | 1.04E-262 | Oligodendrocyte |
| St3gal41   | 1.81E-264 | 0.319 | 0.282 | 0.023 | 3.95E-260 | Oligodendrocyte |
| Jam3       | 7.50E-264 | 0.269 | 0.277 | 0.023 | 1.64E-259 | Oligodendrocyte |
| Ptgds      | 1.81E-262 | 1.040 | 0.391 | 0.050 | 3.97E-258 | Oligodendrocyte |
| Ptprd1     | 1.09E-259 | 1.321 | 0.902 | 0.386 | 2.38E-255 | Oligodendrocyte |
| Dscaml11   | 1.47E-249 | 0.398 | 0.408 | 0.054 | 3.22E-245 | Oligodendrocyte |
| Pacs2      | 3.06E-248 | 0.259 | 0.258 | 0.021 | 6.69E-244 | Oligodendrocyte |
| Arhgap23   | 2.78E-246 | 0.440 | 0.446 | 0.067 | 6.07E-242 | Oligodendrocyte |
| Cyp51      | 1.17E-235 | 0.293 | 0.277 | 0.026 | 2.56E-231 | Oligodendrocyte |
| Josd2      | 4.23E-233 | 0.268 | 0.282 | 0.027 | 9.24E-229 | Oligodendrocyte |
| Sema6d1    | 4.66E-233 | 0.389 | 0.380 | 0.050 | 1.02E-228 | Oligodendrocyte |
| Pcdh91     | 1.37E-232 | 1.271 | 0.996 | 0.989 | 3.00E-228 | Oligodendrocyte |
| Myo1d      | 1.10E-222 | 0.389 | 0.360 | 0.047 | 2.41E-218 | Oligodendrocyte |

|          |           |       |       |       |           |                 |
|----------|-----------|-------|-------|-------|-----------|-----------------|
| Erb41    | 1.42E-220 | 1.009 | 0.751 | 0.218 | 3.10E-216 | Oligodendrocyte |
| Sypl     | 2.42E-218 | 0.274 | 0.279 | 0.028 | 5.28E-214 | Oligodendrocyte |
| Pik3r11  | 4.13E-217 | 0.355 | 0.369 | 0.050 | 9.02E-213 | Oligodendrocyte |
| Nrbp2    | 1.30E-215 | 0.278 | 0.282 | 0.029 | 2.84E-211 | Oligodendrocyte |
| Pak1     | 3.65E-215 | 0.645 | 0.554 | 0.118 | 7.98E-211 | Oligodendrocyte |
| Rtn4     | 4.60E-213 | 0.946 | 0.865 | 0.380 | 1.01E-208 | Oligodendrocyte |
| Pard3    | 9.96E-213 | 0.377 | 0.410 | 0.063 | 2.18E-208 | Oligodendrocyte |
| Grb14    | 3.76E-205 | 0.421 | 0.424 | 0.071 | 8.21E-201 | Oligodendrocyte |
| Zdhhc20  | 2.62E-204 | 0.478 | 0.476 | 0.091 | 5.74E-200 | Oligodendrocyte |
| Npas32   | 2.86E-194 | 0.557 | 0.635 | 0.160 | 6.25E-190 | Oligodendrocyte |
| Cpox     | 4.62E-183 | 0.301 | 0.295 | 0.038 | 1.01E-178 | Oligodendrocyte |
| Stxbp3   | 9.99E-183 | 0.292 | 0.312 | 0.042 | 2.18E-178 | Oligodendrocyte |
| Stmn4    | 1.23E-181 | 0.316 | 0.330 | 0.048 | 2.68E-177 | Oligodendrocyte |
| Ankrd28  | 1.09E-180 | 0.539 | 0.557 | 0.139 | 2.39E-176 | Oligodendrocyte |
| Cdc37l1  | 4.88E-180 | 0.606 | 0.631 | 0.184 | 1.07E-175 | Oligodendrocyte |
| Lrp1b1   | 6.69E-180 | 0.909 | 0.974 | 0.834 | 1.46E-175 | Oligodendrocyte |
| Rcbtb1   | 1.13E-177 | 0.533 | 0.542 | 0.135 | 2.47E-173 | Oligodendrocyte |
| Kif13b   | 2.72E-176 | 0.437 | 0.461 | 0.096 | 5.95E-172 | Oligodendrocyte |
| Zfp536   | 4.92E-176 | 0.574 | 0.568 | 0.148 | 1.08E-171 | Oligodendrocyte |
| Ncam21   | 1.53E-175 | 0.830 | 0.860 | 0.389 | 3.34E-171 | Oligodendrocyte |
| Sept41   | 4.76E-171 | 0.433 | 0.461 | 0.097 | 1.04E-166 | Oligodendrocyte |
| Kndc1    | 1.14E-168 | 0.302 | 0.312 | 0.046 | 2.49E-164 | Oligodendrocyte |
| Usp54    | 1.86E-164 | 0.298 | 0.303 | 0.044 | 4.06E-160 | Oligodendrocyte |
| Pcyt2    | 2.65E-164 | 0.576 | 0.526 | 0.135 | 5.79E-160 | Oligodendrocyte |
| Slc22a23 | 5.28E-158 | 0.310 | 0.315 | 0.049 | 1.15E-153 | Oligodendrocyte |
| Vmp1     | 5.13E-153 | 0.649 | 0.708 | 0.270 | 1.12E-148 | Oligodendrocyte |
| Pak7     | 1.95E-148 | 0.632 | 0.661 | 0.232 | 4.27E-144 | Oligodendrocyte |
| Csmd32   | 5.20E-148 | 0.682 | 0.716 | 0.263 | 1.14E-143 | Oligodendrocyte |
| Tulp4    | 5.97E-148 | 0.623 | 0.683 | 0.248 | 1.30E-143 | Oligodendrocyte |
| Grm31    | 5.25E-147 | 0.546 | 0.478 | 0.121 | 1.15E-142 | Oligodendrocyte |
| Sema5a   | 1.13E-144 | 0.367 | 0.279 | 0.042 | 2.46E-140 | Oligodendrocyte |
| Epn2     | 1.31E-143 | 0.360 | 0.397 | 0.083 | 2.86E-139 | Oligodendrocyte |
| Cd811    | 1.69E-140 | 0.522 | 0.555 | 0.164 | 3.70E-136 | Oligodendrocyte |
| Fnbp11   | 6.05E-137 | 0.615 | 0.681 | 0.251 | 1.32E-132 | Oligodendrocyte |
| Dnm3     | 9.90E-137 | 0.716 | 0.814 | 0.446 | 2.16E-132 | Oligodendrocyte |
| Tmcc1    | 5.77E-135 | 0.648 | 0.764 | 0.352 | 1.26E-130 | Oligodendrocyte |
| Phyhipl1 | 6.96E-132 | 0.297 | 0.273 | 0.044 | 1.52E-127 | Oligodendrocyte |
| Pls1     | 6.56E-130 | 0.312 | 0.336 | 0.066 | 1.43E-125 | Oligodendrocyte |
| Synj2    | 4.16E-127 | 0.270 | 0.277 | 0.046 | 9.10E-123 | Oligodendrocyte |
| Tll7     | 3.79E-126 | 0.530 | 0.541 | 0.175 | 8.29E-122 | Oligodendrocyte |
| Wnk1     | 1.78E-123 | 0.543 | 0.611 | 0.227 | 3.90E-119 | Oligodendrocyte |
| Abca2    | 5.83E-121 | 0.301 | 0.321 | 0.064 | 1.27E-116 | Oligodendrocyte |
| Sec11c   | 1.27E-118 | 0.337 | 0.380 | 0.088 | 2.77E-114 | Oligodendrocyte |
| Sbf1     | 1.21E-117 | 0.282 | 0.315 | 0.063 | 2.64E-113 | Oligodendrocyte |

|         |           |       |       |       |           |                 |
|---------|-----------|-------|-------|-------|-----------|-----------------|
| Neo12   | 4.63E-115 | 0.368 | 0.432 | 0.115 | 1.01E-110 | Oligodendrocyte |
| Tbc1d5  | 5.29E-113 | 0.493 | 0.572 | 0.204 | 1.16E-108 | Oligodendrocyte |
| Ano41   | 5.84E-112 | 0.610 | 0.566 | 0.214 | 1.28E-107 | Oligodendrocyte |
| Actb    | 8.00E-109 | 0.294 | 0.315 | 0.067 | 1.75E-104 | Oligodendrocyte |
| Sema6a  | 1.31E-108 | 0.309 | 0.297 | 0.060 | 2.87E-104 | Oligodendrocyte |
| Cdh2    | 1.02E-106 | 0.603 | 0.694 | 0.338 | 2.23E-102 | Oligodendrocyte |
| Cntn2   | 1.06E-105 | 0.253 | 0.290 | 0.059 | 2.31E-101 | Oligodendrocyte |
| Luzp22  | 3.96E-104 | 0.370 | 0.332 | 0.074 | 8.65E-100 | Oligodendrocyte |
| Phactr1 | 1.50E-102 | 0.422 | 0.594 | 0.220 | 3.27E-98  | Oligodendrocyte |
| Tcf121  | 1.63E-94  | 0.482 | 0.637 | 0.278 | 3.57E-90  | Oligodendrocyte |
| Atp8a11 | 5.34E-93  | 0.394 | 0.465 | 0.153 | 1.17E-88  | Oligodendrocyte |
| Dlg11   | 1.82E-92  | 0.398 | 0.496 | 0.169 | 3.97E-88  | Oligodendrocyte |
| Rap1a   | 7.79E-92  | 0.412 | 0.470 | 0.164 | 1.70E-87  | Oligodendrocyte |
| Rnf13   | 4.13E-91  | 0.363 | 0.485 | 0.168 | 9.04E-87  | Oligodendrocyte |
| Kif1b   | 3.37E-89  | 0.480 | 0.640 | 0.292 | 7.36E-85  | Oligodendrocyte |
| Sik3    | 1.13E-88  | 0.477 | 0.603 | 0.270 | 2.48E-84  | Oligodendrocyte |
| Cyld1   | 2.73E-87  | 0.280 | 0.354 | 0.096 | 5.96E-83  | Oligodendrocyte |
| Bin1    | 1.24E-86  | 0.254 | 0.266 | 0.059 | 2.71E-82  | Oligodendrocyte |
| Gkap1   | 1.40E-86  | 0.293 | 0.338 | 0.091 | 3.07E-82  | Oligodendrocyte |
| Magi11  | 3.40E-85  | 0.348 | 0.461 | 0.154 | 7.44E-81  | Oligodendrocyte |
| Mast41  | 1.05E-83  | 0.583 | 0.745 | 0.423 | 2.29E-79  | Oligodendrocyte |
| Tmcc3   | 1.82E-82  | 0.334 | 0.448 | 0.154 | 3.97E-78  | Oligodendrocyte |
| Dip2b2  | 1.93E-82  | 0.402 | 0.587 | 0.245 | 4.22E-78  | Oligodendrocyte |
| Ppp2r2a | 5.99E-82  | 0.303 | 0.378 | 0.115 | 1.31E-77  | Oligodendrocyte |
| Ephb1   | 1.51E-79  | 0.316 | 0.354 | 0.104 | 3.30E-75  | Oligodendrocyte |
| Mitf    | 1.08E-77  | 0.294 | 0.293 | 0.076 | 2.36E-73  | Oligodendrocyte |
| Shtn1   | 1.19E-76  | 0.300 | 0.345 | 0.103 | 2.59E-72  | Oligodendrocyte |
| Slc44a1 | 4.57E-76  | 0.393 | 0.474 | 0.185 | 9.98E-72  | Oligodendrocyte |
| Dip2a   | 1.71E-74  | 0.335 | 0.404 | 0.138 | 3.74E-70  | Oligodendrocyte |
| Abhd17b | 8.20E-74  | 0.410 | 0.568 | 0.255 | 1.79E-69  | Oligodendrocyte |
| Acap2   | 1.62E-73  | 0.295 | 0.384 | 0.125 | 3.55E-69  | Oligodendrocyte |
| Pcdh15  | 1.04E-72  | 0.500 | 0.290 | 0.080 | 2.28E-68  | Oligodendrocyte |
| Rsrp1   | 3.16E-72  | 0.407 | 0.635 | 0.316 | 6.90E-68  | Oligodendrocyte |
| Rab31   | 5.50E-72  | 0.278 | 0.397 | 0.133 | 1.20E-67  | Oligodendrocyte |
| Lamp1   | 8.10E-70  | 0.321 | 0.437 | 0.163 | 1.77E-65  | Oligodendrocyte |
| Acaca   | 9.60E-70  | 0.407 | 0.487 | 0.207 | 2.10E-65  | Oligodendrocyte |
| Ncam12  | 1.84E-68  | 0.432 | 0.725 | 0.418 | 4.03E-64  | Oligodendrocyte |
| Clasp2  | 1.86E-66  | 0.379 | 0.624 | 0.313 | 4.06E-62  | Oligodendrocyte |
| Fign    | 1.28E-65  | 0.302 | 0.371 | 0.128 | 2.80E-61  | Oligodendrocyte |
| Gm38304 | 1.79E-65  | 0.311 | 0.391 | 0.141 | 3.91E-61  | Oligodendrocyte |
| Gm48678 | 2.46E-65  | 0.329 | 0.452 | 0.179 | 5.39E-61  | Oligodendrocyte |
| Sccpdh  | 4.33E-64  | 0.292 | 0.365 | 0.126 | 9.47E-60  | Oligodendrocyte |
| Syt11   | 7.48E-64  | 0.321 | 0.458 | 0.183 | 1.64E-59  | Oligodendrocyte |
| Ube2e2  | 4.94E-63  | 0.481 | 0.690 | 0.418 | 1.08E-58  | Oligodendrocyte |



|           |          |       |       |       |          |                 |
|-----------|----------|-------|-------|-------|----------|-----------------|
| Fgfr21    | 1.47E-62 | 0.525 | 0.716 | 0.452 | 3.20E-58 | Oligodendrocyte |
| Mapt      | 3.01E-62 | 0.453 | 0.686 | 0.414 | 6.59E-58 | Oligodendrocyte |
| Ppp2r3a   | 2.45E-61 | 0.331 | 0.472 | 0.201 | 5.36E-57 | Oligodendrocyte |
| Myo61     | 8.26E-61 | 0.294 | 0.439 | 0.175 | 1.81E-56 | Oligodendrocyte |
| Srsf21    | 3.03E-60 | 0.363 | 0.535 | 0.251 | 6.62E-56 | Oligodendrocyte |
| Dst1      | 5.22E-60 | 0.391 | 0.696 | 0.389 | 1.14E-55 | Oligodendrocyte |
| Slc38a2   | 5.52E-59 | 0.348 | 0.498 | 0.223 | 1.21E-54 | Oligodendrocyte |
| Tspan2    | 1.16E-58 | 0.355 | 0.400 | 0.159 | 2.53E-54 | Oligodendrocyte |
| Mettl231  | 7.84E-57 | 0.396 | 0.616 | 0.329 | 1.71E-52 | Oligodendrocyte |
| Spag91    | 2.98E-56 | 0.348 | 0.607 | 0.320 | 6.52E-52 | Oligodendrocyte |
| Limch1    | 3.45E-56 | 0.320 | 0.485 | 0.220 | 7.53E-52 | Oligodendrocyte |
| Picalm    | 3.86E-55 | 0.298 | 0.404 | 0.164 | 8.43E-51 | Oligodendrocyte |
| Otud7b    | 4.26E-55 | 0.298 | 0.432 | 0.184 | 9.31E-51 | Oligodendrocyte |
| Trim35    | 6.25E-55 | 0.361 | 0.542 | 0.277 | 1.36E-50 | Oligodendrocyte |
| App       | 5.45E-54 | 0.377 | 0.659 | 0.376 | 1.19E-49 | Oligodendrocyte |
| Kif13a    | 3.09E-52 | 0.276 | 0.391 | 0.158 | 6.76E-48 | Oligodendrocyte |
| Sh3d191   | 1.59E-50 | 0.327 | 0.513 | 0.253 | 3.47E-46 | Oligodendrocyte |
| Zbtb203   | 5.42E-50 | 0.346 | 0.707 | 0.396 | 1.18E-45 | Oligodendrocyte |
| Eml11     | 1.47E-49 | 0.378 | 0.507 | 0.267 | 3.22E-45 | Oligodendrocyte |
| Ptk21     | 2.79E-49 | 0.381 | 0.579 | 0.337 | 6.10E-45 | Oligodendrocyte |
| Naaladl21 | 1.52E-46 | 0.419 | 0.624 | 0.370 | 3.31E-42 | Oligodendrocyte |
| Slc25a27  | 2.78E-46 | 0.261 | 0.365 | 0.152 | 6.07E-42 | Oligodendrocyte |
| Zcchc7    | 2.07E-45 | 0.362 | 0.653 | 0.419 | 4.53E-41 | Oligodendrocyte |
| Frmd51    | 2.56E-45 | 0.404 | 0.836 | 0.589 | 5.59E-41 | Oligodendrocyte |
| Ankib1    | 3.03E-45 | 0.271 | 0.387 | 0.169 | 6.62E-41 | Oligodendrocyte |
| Map4k4    | 1.35E-44 | 0.257 | 0.410 | 0.184 | 2.96E-40 | Oligodendrocyte |
| Ank32     | 5.44E-44 | 0.453 | 0.736 | 0.486 | 1.19E-39 | Oligodendrocyte |
| Dctn4     | 4.04E-43 | 0.282 | 0.408 | 0.188 | 8.82E-39 | Oligodendrocyte |
| Itch      | 5.12E-43 | 0.265 | 0.441 | 0.210 | 1.12E-38 | Oligodendrocyte |
| Mbnl2     | 8.79E-42 | 0.344 | 0.631 | 0.410 | 1.92E-37 | Oligodendrocyte |
| Il1rap1   | 1.09E-39 | 0.254 | 0.424 | 0.204 | 2.39E-35 | Oligodendrocyte |
| Lcorl     | 2.54E-39 | 0.267 | 0.319 | 0.131 | 5.56E-35 | Oligodendrocyte |
| Ssh2      | 3.79E-39 | 0.287 | 0.434 | 0.216 | 8.29E-35 | Oligodendrocyte |
| Nrd1      | 1.08E-38 | 0.264 | 0.411 | 0.200 | 2.37E-34 | Oligodendrocyte |
| Arid4b    | 3.46E-38 | 0.286 | 0.463 | 0.242 | 7.56E-34 | Oligodendrocyte |
| Plekha1   | 6.25E-37 | 0.264 | 0.280 | 0.113 | 1.37E-32 | Oligodendrocyte |
| Gm424183  | 9.86E-36 | 0.308 | 0.841 | 0.559 | 2.15E-31 | Oligodendrocyte |
| Magi21    | 2.27E-34 | 0.302 | 0.980 | 0.990 | 4.95E-30 | Oligodendrocyte |
| Map4      | 2.93E-34 | 0.300 | 0.507 | 0.303 | 6.41E-30 | Oligodendrocyte |
| Tjp11     | 8.53E-34 | 0.270 | 0.434 | 0.230 | 1.86E-29 | Oligodendrocyte |
| Atp6v0b2  | 2.33E-33 | 0.258 | 0.644 | 0.400 | 5.09E-29 | Oligodendrocyte |
| Baz2b     | 4.68E-33 | 0.280 | 0.594 | 0.368 | 1.02E-28 | Oligodendrocyte |
| Ctnna21   | 1.50E-32 | 0.450 | 0.714 | 0.577 | 3.28E-28 | Oligodendrocyte |
| Tmem178b  | 4.81E-30 | 0.321 | 0.550 | 0.360 | 1.05E-25 | Oligodendrocyte |

|           |          |       |       |       |          |                 |
|-----------|----------|-------|-------|-------|----------|-----------------|
| Tmtc21    | 1.19E-29 | 0.268 | 0.583 | 0.361 | 2.60E-25 | Oligodendrocyte |
| Daam1     | 1.39E-29 | 0.256 | 0.345 | 0.174 | 3.04E-25 | Oligodendrocyte |
| Rbm392    | 3.68E-29 | 0.257 | 0.712 | 0.492 | 8.03E-25 | Oligodendrocyte |
| Plxdc21   | 2.77E-28 | 0.295 | 0.568 | 0.381 | 6.06E-24 | Oligodendrocyte |
| Mycbp22   | 6.46E-28 | 0.280 | 0.710 | 0.500 | 1.41E-23 | Oligodendrocyte |
| Gm283761  | 1.00E-22 | 0.263 | 0.546 | 0.356 | 2.19E-18 | Oligodendrocyte |
| Nfasc     | 1.48E-18 | 0.411 | 0.419 | 0.284 | 3.24E-14 | Oligodendrocyte |
| Fmnl2     | 1.73E-17 | 0.256 | 0.458 | 0.317 | 3.79E-13 | Oligodendrocyte |
| Spock32   | 1.77E-17 | 0.283 | 0.476 | 0.339 | 3.87E-13 | Oligodendrocyte |
| Prickle11 | 4.33E-16 | 0.308 | 0.325 | 0.203 | 9.47E-12 | Oligodendrocyte |
| Pcdh72    | 1.76E-12 | 0.531 | 0.293 | 0.197 | 3.84E-08 | Oligodendrocyte |
| Lhfpl32   | 1.86E-09 | 0.348 | 0.185 | 0.335 | 4.07E-05 | Oligodendrocyte |

**Supplementary Table 3.****Differentially expressed genes (DEGs) of *Aldoc*+ vs. *Plcb4*+ Purkinje neurons**

| Gene    | <i>Aldoc</i> + | <i>Plcb4</i> + | avg_logFC | pct.1 | pct.2 | p_val_adj |
|---------|----------------|----------------|-----------|-------|-------|-----------|
| Mpped2  | 1.605          | 0.118          | 1.536     | 0.750 | 0.081 | 0.00E+00  |
| Gm12682 | 1.733          | 0.312          | 1.471     | 0.517 | 0.195 | 0.00E+00  |
| Gm32647 | 1.779          | 0.388          | 1.441     | 0.648 | 0.213 | 0.00E+00  |
| Epha5   | 2.616          | 1.375          | 1.291     | 0.976 | 0.780 | 0.00E+00  |
| Nlgn1   | 2.604          | 1.397          | 1.257     | 0.981 | 0.747 | 0.00E+00  |
| Aldoc   | 1.258          | 0.066          | 1.242     | 0.880 | 0.068 | 0.00E+00  |
| Nav3    | 2.134          | 0.975          | 1.209     | 0.974 | 0.616 | 0.00E+00  |
| Camk2d  | 1.518          | 0.395          | 1.173     | 0.893 | 0.284 | 0.00E+00  |
| Eda     | 1.478          | 0.374          | 1.153     | 0.712 | 0.250 | 0.00E+00  |
| Dgkh    | 3.087          | 2.035          | 1.102     | 1.000 | 0.983 | 0.00E+00  |
| Kirrel3 | 1.649          | 0.611          | 1.088     | 0.715 | 0.392 | 0.00E+00  |
| Sorcs2  | 1.094          | 0.076          | 1.068     | 0.644 | 0.060 | 0.00E+00  |
| Cux2    | 1.236          | 0.241          | 1.045     | 0.836 | 0.186 | 0.00E+00  |
| Erc2    | 2.754          | 1.808          | 0.996     | 0.994 | 0.976 | 0.00E+00  |
| Slc1a6  | 2.703          | 1.771          | 0.982     | 1.000 | 0.963 | 0.00E+00  |
| Rgs7    | 2.426          | 1.541          | 0.935     | 0.998 | 0.887 | 0.00E+00  |
| Fstl4   | 2.086          | 1.240          | 0.897     | 0.966 | 0.831 | 0.00E+00  |
| Col4a5  | 0.959          | 0.120          | 0.888     | 0.628 | 0.085 | 0.00E+00  |
| Cadm1   | 1.092          | 0.272          | 0.870     | 0.559 | 0.230 | 0.00E+00  |
| Clstn2  | 2.271          | 1.457          | 0.864     | 0.983 | 0.906 | 0.00E+00  |
| Cpne9   | 1.171          | 0.370          | 0.851     | 0.826 | 0.293 | 0.00E+00  |
| Pde1c   | 1.800          | 1.022          | 0.828     | 0.893 | 0.716 | 0.00E+00  |
| Slit2   | 0.817          | 0.039          | 0.827     | 0.445 | 0.027 | 0.00E+00  |
| Corin   | 1.762          | 1.001          | 0.811     | 0.924 | 0.581 | 0.00E+00  |
| Cdh10   | 0.858          | 0.106          | 0.802     | 0.466 | 0.060 | 0.00E+00  |
| Zbtb20  | 1.495          | 0.744          | 0.801     | 0.780 | 0.601 | 0.00E+00  |
| Col4a6  | 0.727          | 0.019          | 0.758     | 0.326 | 0.017 | 0.00E+00  |
| Car7    | 0.988          | 0.294          | 0.744     | 0.701 | 0.276 | 0.00E+00  |
| Mgat4c  | 0.822          | 0.132          | 0.740     | 0.458 | 0.117 | 0.00E+00  |
| Cntn5   | 2.236          | 1.551          | 0.735     | 0.863 | 0.714 | 0.00E+00  |
| Sntg1   | 1.973          | 1.293          | 0.731     | 0.891 | 0.750 | 0.00E+00  |
| Pigs    | 0.861          | 0.190          | 0.721     | 0.669 | 0.170 | 0.00E+00  |
| Gm28376 | 1.258          | 0.608          | 0.700     | 0.726 | 0.436 | 0.00E+00  |
| Prkcd   | 0.658          | 0.022          | 0.685     | 0.483 | 0.018 | 0.00E+00  |
| Trpc4   | 0.836          | 0.205          | 0.681     | 0.615 | 0.171 | 0.00E+00  |
| Col4a2  | 0.643          | 0.014          | 0.679     | 0.384 | 0.012 | 0.00E+00  |
| Lrp1b   | 3.765          | 3.140          | 0.675     | 0.999 | 1.000 | 0.00E+00  |
| Kctd8   | 0.654          | 0.045          | 0.659     | 0.278 | 0.039 | 0.00E+00  |
| Cntn6   | 1.939          | 1.331          | 0.658     | 0.947 | 0.854 | 0.00E+00  |
| Wscd2   | 0.793          | 0.191          | 0.652     | 0.630 | 0.162 | 0.00E+00  |
| Plcx2   | 0.605          | 0.005          | 0.651     | 0.360 | 0.004 | 0.00E+00  |
| Cacna1d | 1.377          | 0.777          | 0.651     | 0.873 | 0.613 | 0.00E+00  |
| Slc24a2 | 1.807          | 1.218          | 0.639     | 0.954 | 0.842 | 0.00E+00  |

|               |       |       |       |       |       |          |
|---------------|-------|-------|-------|-------|-------|----------|
| Fgf10         | 0.656 | 0.069 | 0.637 | 0.405 | 0.047 | 0.00E+00 |
| Epha7         | 1.252 | 0.666 | 0.636 | 0.731 | 0.460 | 0.00E+00 |
| Tenm2         | 3.524 | 2.968 | 0.605 | 0.990 | 0.964 | 0.00E+00 |
| Slc8a1        | 1.834 | 1.291 | 0.593 | 0.910 | 0.851 | 0.00E+00 |
| Col4a1        | 0.554 | 0.014 | 0.589 | 0.310 | 0.013 | 0.00E+00 |
| Celf3         | 0.596 | 0.061 | 0.585 | 0.488 | 0.055 | 0.00E+00 |
| Unc5d         | 2.918 | 2.400 | 0.568 | 0.949 | 0.917 | 0.00E+00 |
| Gm27199       | 0.786 | 0.274 | 0.562 | 0.644 | 0.250 | 0.00E+00 |
| CT025619.1    | 2.411 | 1.910 | 0.551 | 0.999 | 0.987 | 0.00E+00 |
| Kcnn2         | 1.065 | 0.565 | 0.551 | 0.702 | 0.498 | 0.00E+00 |
| Tmeff2        | 2.700 | 2.202 | 0.548 | 0.995 | 0.966 | 0.00E+00 |
| Ppp2r2b       | 1.620 | 1.122 | 0.547 | 0.927 | 0.807 | 0.00E+00 |
| Rora          | 3.357 | 2.859 | 0.547 | 1.000 | 1.000 | 0.00E+00 |
| Cdh12         | 2.713 | 2.229 | 0.534 | 0.979 | 0.930 | 0.00E+00 |
| Gm20647       | 1.126 | 0.652 | 0.524 | 0.687 | 0.434 | 0.00E+00 |
| Cdh18         | 5.066 | 4.604 | 0.512 | 1.000 | 1.000 | 0.00E+00 |
| Mei4          | 1.643 | 1.190 | 0.503 | 0.924 | 0.803 | 0.00E+00 |
| B3galt5       | 0.462 | 0.014 | 0.498 | 0.316 | 0.013 | 0.00E+00 |
| Ptpn          | 0.897 | 0.449 | 0.497 | 0.646 | 0.371 | 0.00E+00 |
| Rps6ka5       | 1.777 | 1.332 | 0.494 | 0.949 | 0.898 | 0.00E+00 |
| Xkr4          | 2.288 | 1.845 | 0.493 | 0.991 | 0.974 | 0.00E+00 |
| Ntrk3         | 1.735 | 1.302 | 0.484 | 0.968 | 0.897 | 0.00E+00 |
| Kctd12        | 0.536 | 0.109 | 0.476 | 0.451 | 0.099 | 0.00E+00 |
| Ripor2        | 1.365 | 0.946 | 0.469 | 0.863 | 0.747 | 0.00E+00 |
| Slc6a1        | 0.431 | 0.018 | 0.463 | 0.338 | 0.015 | 0.00E+00 |
| Lhfp          | 0.693 | 0.281 | 0.462 | 0.508 | 0.246 | 0.00E+00 |
| Rgs6          | 0.450 | 0.042 | 0.458 | 0.275 | 0.039 | 0.00E+00 |
| Hecw2         | 2.128 | 1.721 | 0.457 | 0.995 | 0.978 | 0.00E+00 |
| Dpp6          | 1.394 | 0.991 | 0.453 | 0.880 | 0.755 | 0.00E+00 |
| Opcml         | 2.564 | 2.164 | 0.450 | 0.980 | 0.967 | 0.00E+00 |
| Ephb2         | 0.449 | 0.063 | 0.437 | 0.290 | 0.054 | 0.00E+00 |
| Rspo3         | 0.721 | 0.335 | 0.436 | 0.514 | 0.254 | 0.00E+00 |
| Pcsk2         | 0.505 | 0.119 | 0.436 | 0.359 | 0.105 | 0.00E+00 |
| Syndig1       | 3.203 | 2.820 | 0.432 | 1.000 | 1.000 | 0.00E+00 |
| Jph1          | 0.605 | 0.224 | 0.431 | 0.466 | 0.197 | 0.00E+00 |
| Ppp3ca        | 2.363 | 1.985 | 0.428 | 0.999 | 0.996 | 0.00E+00 |
| 4921534H16Rik | 0.769 | 0.391 | 0.427 | 0.587 | 0.358 | 0.00E+00 |
| Fam107b       | 2.316 | 1.944 | 0.422 | 0.994 | 0.960 | 0.00E+00 |
| Gng2          | 0.386 | 0.016 | 0.420 | 0.284 | 0.014 | 0.00E+00 |
| Spag5         | 1.661 | 1.292 | 0.419 | 0.913 | 0.650 | 0.00E+00 |
| Arhgap42      | 0.585 | 0.217 | 0.419 | 0.484 | 0.196 | 0.00E+00 |
| Abr           | 2.134 | 1.770 | 0.414 | 0.992 | 0.975 | 0.00E+00 |
| Ahi1          | 1.620 | 1.261 | 0.409 | 0.945 | 0.883 | 0.00E+00 |
| Nrg1          | 0.766 | 0.406 | 0.409 | 0.559 | 0.287 | 0.00E+00 |
| Gm26688       | 0.411 | 0.055 | 0.406 | 0.330 | 0.046 | 0.00E+00 |
| Meg3          | 4.380 | 4.028 | 0.402 | 1.000 | 1.000 | 0.00E+00 |

|          |       |       |       |       |       |           |
|----------|-------|-------|-------|-------|-------|-----------|
| Gm26778  | 0.455 | 0.103 | 0.402 | 0.360 | 0.092 | 0.00E+00  |
| Snx21    | 0.714 | 0.363 | 0.401 | 0.595 | 0.338 | 0.00E+00  |
| Arhgef37 | 1.124 | 0.775 | 0.398 | 0.787 | 0.620 | 0.00E+00  |
| Galm     | 0.395 | 0.049 | 0.396 | 0.280 | 0.045 | 0.00E+00  |
| Cntnap5b | 3.957 | 3.618 | 0.389 | 1.000 | 1.000 | 0.00E+00  |
| Olfm1    | 0.433 | 0.095 | 0.387 | 0.361 | 0.086 | 0.00E+00  |
| Pacs1    | 0.496 | 0.161 | 0.386 | 0.390 | 0.138 | 0.00E+00  |
| Colq     | 0.348 | 0.014 | 0.385 | 0.289 | 0.012 | 0.00E+00  |
| Gnao1    | 1.899 | 1.568 | 0.381 | 0.978 | 0.958 | 0.00E+00  |
| Slc23a2  | 1.598 | 1.284 | 0.364 | 0.956 | 0.896 | 0.00E+00  |
| Tecr     | 1.555 | 1.247 | 0.358 | 0.958 | 0.888 | 0.00E+00  |
| Cacna1c  | 0.427 | 0.121 | 0.356 | 0.340 | 0.116 | 0.00E+00  |
| Plcb3    | 0.562 | 0.258 | 0.354 | 0.480 | 0.236 | 0.00E+00  |
| Mdga2    | 3.537 | 3.238 | 0.349 | 1.000 | 1.000 | 0.00E+00  |
| Kcnc1    | 0.479 | 0.184 | 0.345 | 0.430 | 0.170 | 0.00E+00  |
| Frmd6    | 0.375 | 0.085 | 0.340 | 0.313 | 0.077 | 0.00E+00  |
| Ccdc136  | 0.378 | 0.092 | 0.335 | 0.335 | 0.086 | 0.00E+00  |
| Gabbr2   | 2.551 | 2.275 | 0.326 | 1.000 | 0.998 | 0.00E+00  |
| Strbp    | 2.185 | 1.916 | 0.319 | 0.997 | 0.990 | 0.00E+00  |
| Tfap2a   | 0.298 | 0.032 | 0.316 | 0.250 | 0.030 | 0.00E+00  |
| Nsg2     | 0.324 | 0.060 | 0.314 | 0.291 | 0.052 | 0.00E+00  |
| Zeb2     | 0.277 | 0.014 | 0.313 | 0.175 | 0.013 | 0.00E+00  |
| Hdac9    | 2.517 | 2.254 | 0.313 | 0.999 | 0.997 | 0.00E+00  |
| Nbea     | 3.042 | 2.783 | 0.309 | 1.000 | 1.000 | 0.00E+00  |
| Rph3a    | 0.255 | 0.007 | 0.298 | 0.187 | 0.007 | 0.00E+00  |
| Gnaq     | 2.103 | 1.857 | 0.296 | 0.997 | 0.990 | 0.00E+00  |
| Myo1e    | 0.254 | 0.010 | 0.294 | 0.165 | 0.010 | 0.00E+00  |
| Mast4    | 2.743 | 2.503 | 0.290 | 1.000 | 1.000 | 0.00E+00  |
| Pcdh10   | 0.258 | 0.020 | 0.288 | 0.209 | 0.017 | 0.00E+00  |
| Bmp2k    | 0.307 | 0.073 | 0.284 | 0.274 | 0.069 | 0.00E+00  |
| Kcnip4   | 3.669 | 3.445 | 0.274 | 1.000 | 1.000 | 0.00E+00  |
| Ctnnd2   | 2.590 | 2.367 | 0.273 | 1.000 | 1.000 | 0.00E+00  |
| Gm32219  | 0.212 | 0.001 | 0.260 | 0.136 | 0.001 | 0.00E+00  |
| Trpc7    | 0.212 | 0.003 | 0.259 | 0.148 | 0.003 | 0.00E+00  |
| Ldlrad4  | 1.195 | 0.847 | 0.399 | 0.827 | 0.697 | 2.65E-303 |
| Syt1     | 0.573 | 0.079 | 0.544 | 0.252 | 0.066 | 4.29E-301 |
| Nrxn1    | 2.126 | 1.782 | 0.394 | 0.977 | 0.918 | 2.89E-297 |
| Focad    | 0.683 | 0.359 | 0.373 | 0.560 | 0.327 | 3.41E-296 |
| Fam13b   | 1.846 | 1.577 | 0.319 | 0.984 | 0.950 | 7.46E-293 |
| Sema4d   | 0.264 | 0.044 | 0.270 | 0.209 | 0.039 | 8.00E-289 |
| Sep4     | 0.597 | 0.280 | 0.368 | 0.488 | 0.265 | 1.18E-281 |
| Heatr5a  | 1.815 | 1.556 | 0.310 | 0.982 | 0.946 | 1.20E-279 |
| Pde10a   | 2.401 | 2.000 | 0.451 | 0.988 | 0.964 | 3.55E-277 |
| Arhgap20 | 2.238 | 1.983 | 0.305 | 0.995 | 0.990 | 1.41E-276 |
| Il1rapl2 | 1.058 | 0.143 | 0.965 | 0.326 | 0.135 | 1.06E-275 |
| Ncam1    | 1.956 | 1.692 | 0.315 | 0.989 | 0.979 | 5.09E-275 |

|               |       |       |       |       |       |           |
|---------------|-------|-------|-------|-------|-------|-----------|
| Tmem132c      | 0.717 | 0.326 | 0.441 | 0.494 | 0.281 | 9.10E-275 |
| Dync1i1       | 2.461 | 2.250 | 0.261 | 1.000 | 0.999 | 6.40E-269 |
| Unc13c        | 0.558 | 0.111 | 0.497 | 0.281 | 0.097 | 2.28E-265 |
| Cntn1         | 1.763 | 1.503 | 0.310 | 0.971 | 0.928 | 4.38E-263 |
| 1700047F07Rik | 0.507 | 0.225 | 0.332 | 0.405 | 0.189 | 2.50E-262 |
| Sh2d4b        | 0.980 | 0.618 | 0.412 | 0.678 | 0.509 | 2.36E-260 |
| Gprin3        | 0.266 | 0.053 | 0.263 | 0.206 | 0.045 | 5.00E-259 |
| Myt1l         | 0.888 | 0.554 | 0.384 | 0.676 | 0.501 | 1.08E-258 |
| Gm15155       | 1.005 | 0.627 | 0.428 | 0.660 | 0.466 | 4.78E-255 |
| 4930556G01Rik | 0.246 | 0.022 | 0.274 | 0.156 | 0.020 | 7.79E-253 |
| Dlx4os        | 0.492 | 0.227 | 0.315 | 0.431 | 0.219 | 1.84E-252 |
| A530046M15Rik | 0.435 | 0.181 | 0.304 | 0.362 | 0.156 | 5.37E-250 |
| Cemip         | 0.345 | 0.105 | 0.290 | 0.279 | 0.096 | 1.93E-247 |
| Pdzrn4        | 0.839 | 0.478 | 0.411 | 0.544 | 0.326 | 1.49E-246 |
| Ppm1b         | 1.350 | 1.061 | 0.339 | 0.889 | 0.821 | 1.81E-245 |
| Bcl11a        | 1.576 | 1.310 | 0.315 | 0.942 | 0.880 | 2.12E-239 |
| Gm26848       | 1.661 | 1.384 | 0.327 | 0.944 | 0.891 | 4.25E-233 |
| Aplp2         | 0.781 | 0.506 | 0.325 | 0.650 | 0.467 | 4.23E-231 |
| Kcnq3         | 0.268 | 0.037 | 0.280 | 0.174 | 0.034 | 1.83E-229 |
| Galnt9        | 0.799 | 0.504 | 0.345 | 0.640 | 0.461 | 3.09E-228 |
| Synpo2        | 0.407 | 0.106 | 0.351 | 0.248 | 0.083 | 3.86E-226 |
| Csmd3         | 0.593 | 0.225 | 0.418 | 0.400 | 0.213 | 2.47E-225 |
| Hdac7         | 0.826 | 0.545 | 0.331 | 0.670 | 0.500 | 1.59E-223 |
| Tshz2         | 0.335 | 0.083 | 0.302 | 0.218 | 0.063 | 2.52E-221 |
| Gpr176        | 1.131 | 0.067 | 1.114 | 0.207 | 0.062 | 2.58E-220 |
| Ryr1          | 1.696 | 1.490 | 0.256 | 0.978 | 0.956 | 3.79E-216 |
| Slc12a5       | 1.174 | 0.917 | 0.307 | 0.856 | 0.759 | 1.79E-214 |
| Pcp2          | 2.795 | 2.572 | 0.273 | 0.999 | 0.998 | 4.78E-214 |
| Sez6l         | 1.076 | 0.775 | 0.351 | 0.758 | 0.634 | 2.13E-213 |
| Epha6         | 2.569 | 2.363 | 0.256 | 0.999 | 0.999 | 9.04E-213 |
| Arhgap15      | 0.611 | 0.335 | 0.326 | 0.482 | 0.283 | 2.06E-212 |
| Car10         | 0.427 | 0.082 | 0.395 | 0.219 | 0.069 | 7.39E-211 |
| Asic2         | 1.422 | 1.114 | 0.359 | 0.814 | 0.676 | 9.52E-211 |
| Gm26883       | 0.283 | 0.060 | 0.273 | 0.180 | 0.042 | 2.44E-208 |
| Ppard         | 0.715 | 0.443 | 0.322 | 0.596 | 0.417 | 5.90E-207 |
| Gm47710       | 1.326 | 0.989 | 0.387 | 0.822 | 0.727 | 7.63E-207 |
| Rims2         | 1.973 | 1.764 | 0.259 | 0.991 | 0.982 | 7.91E-207 |
| Gm47352       | 0.808 | 0.502 | 0.356 | 0.589 | 0.401 | 7.33E-204 |
| Plcx3         | 0.539 | 0.211 | 0.378 | 0.336 | 0.158 | 2.12E-203 |
| Apba1         | 1.460 | 1.207 | 0.302 | 0.923 | 0.874 | 5.36E-203 |
| Larp1         | 1.262 | 1.025 | 0.287 | 0.888 | 0.814 | 2.09E-200 |
| Spock1        | 0.905 | 0.550 | 0.405 | 0.596 | 0.414 | 4.81E-200 |
| Cntn4         | 2.327 | 1.958 | 0.420 | 0.945 | 0.941 | 5.42E-196 |
| Podxl2        | 0.723 | 0.463 | 0.311 | 0.601 | 0.429 | 3.91E-194 |
| Ppp1r14b      | 0.589 | 0.347 | 0.291 | 0.510 | 0.322 | 1.15E-192 |
| Kif26b        | 0.437 | 0.195 | 0.292 | 0.353 | 0.180 | 5.15E-185 |

|               |       |       |       |       |       |           |
|---------------|-------|-------|-------|-------|-------|-----------|
| Zfand5        | 1.068 | 0.811 | 0.307 | 0.795 | 0.699 | 8.15E-185 |
| A230057D06Rik | 1.421 | 1.108 | 0.363 | 0.870 | 0.799 | 1.36E-183 |
| Ptchd1        | 0.641 | 0.388 | 0.303 | 0.520 | 0.333 | 1.75E-182 |
| Arl15         | 1.449 | 1.195 | 0.304 | 0.909 | 0.859 | 6.91E-180 |
| Phf1          | 0.501 | 0.279 | 0.272 | 0.450 | 0.270 | 8.39E-179 |
| Ablim3        | 0.589 | 0.343 | 0.296 | 0.485 | 0.303 | 7.13E-178 |
| Gpr158        | 0.955 | 0.580 | 0.425 | 0.609 | 0.486 | 1.67E-175 |
| Ryr2          | 1.139 | 0.894 | 0.295 | 0.825 | 0.728 | 1.50E-174 |
| Fstl5         | 0.276 | 0.065 | 0.261 | 0.192 | 0.062 | 8.57E-173 |
| Dnah6         | 1.126 | 0.871 | 0.304 | 0.800 | 0.718 | 1.17E-171 |
| Slc4a3        | 0.671 | 0.444 | 0.277 | 0.587 | 0.416 | 4.18E-171 |
| Osbpl9        | 1.219 | 1.007 | 0.262 | 0.872 | 0.799 | 6.56E-171 |
| Rnf121        | 0.556 | 0.292 | 0.314 | 0.444 | 0.276 | 1.03E-169 |
| Rrbp1         | 0.745 | 0.437 | 0.359 | 0.562 | 0.410 | 5.18E-169 |
| Fndc3b        | 1.025 | 0.767 | 0.308 | 0.760 | 0.660 | 1.47E-167 |
| Fhod3         | 1.191 | 0.939 | 0.302 | 0.833 | 0.752 | 2.87E-163 |
| Fut8          | 1.426 | 1.200 | 0.276 | 0.917 | 0.879 | 1.32E-162 |
| Lhx5          | 0.572 | 0.351 | 0.271 | 0.484 | 0.308 | 1.48E-160 |
| Fam19a2       | 0.606 | 0.218 | 0.438 | 0.277 | 0.132 | 2.83E-159 |
| Gnal          | 1.248 | 1.018 | 0.280 | 0.848 | 0.769 | 2.37E-158 |
| Pdzrn3        | 0.598 | 0.321 | 0.327 | 0.398 | 0.230 | 3.19E-157 |
| AC149090.1    | 1.857 | 1.635 | 0.272 | 0.933 | 0.923 | 2.22E-154 |
| Pvt1          | 0.931 | 0.685 | 0.296 | 0.709 | 0.591 | 3.26E-154 |
| Hecw1         | 1.427 | 1.206 | 0.271 | 0.909 | 0.863 | 9.26E-154 |
| Sfxn5         | 1.112 | 0.886 | 0.276 | 0.813 | 0.730 | 4.39E-153 |
| Sh3d19        | 1.551 | 1.342 | 0.259 | 0.941 | 0.907 | 4.79E-153 |
| Ccdc112       | 0.474 | 0.271 | 0.253 | 0.412 | 0.247 | 1.34E-148 |
| Eps8l2        | 0.623 | 0.414 | 0.259 | 0.540 | 0.377 | 3.72E-145 |
| Pcp4          | 1.040 | 0.803 | 0.287 | 0.767 | 0.666 | 1.12E-144 |
| 4930488L21Rik | 0.522 | 0.288 | 0.284 | 0.418 | 0.260 | 1.80E-144 |
| Camk4         | 1.035 | 0.807 | 0.278 | 0.766 | 0.663 | 2.16E-142 |
| Gm4681        | 0.862 | 0.488 | 0.425 | 0.539 | 0.413 | 1.29E-141 |
| St6galnac5    | 0.292 | 0.091 | 0.251 | 0.204 | 0.082 | 1.01E-138 |
| Gm45645       | 0.463 | 0.209 | 0.304 | 0.330 | 0.185 | 7.85E-138 |
| Gng13         | 0.718 | 0.498 | 0.270 | 0.583 | 0.437 | 8.74E-137 |
| Mmp24         | 1.068 | 0.865 | 0.253 | 0.805 | 0.730 | 6.64E-134 |
| Tspan14       | 0.707 | 0.487 | 0.270 | 0.588 | 0.448 | 2.97E-133 |
| Il22          | 0.870 | 0.580 | 0.340 | 0.603 | 0.483 | 5.26E-132 |
| Grb14         | 0.769 | 0.538 | 0.282 | 0.604 | 0.468 | 4.20E-130 |
| Tmem132cos    | 0.443 | 0.205 | 0.287 | 0.312 | 0.172 | 1.11E-129 |
| Gm28153       | 1.139 | 0.803 | 0.386 | 0.657 | 0.548 | 1.29E-128 |
| Zmynd11       | 0.690 | 0.487 | 0.254 | 0.594 | 0.456 | 5.21E-128 |
| Cdh11         | 0.966 | 0.692 | 0.325 | 0.652 | 0.554 | 3.46E-123 |
| Kif5c         | 1.084 | 0.883 | 0.252 | 0.814 | 0.747 | 3.54E-122 |
| Tenm3         | 2.040 | 1.516 | 0.574 | 0.750 | 0.673 | 6.86E-121 |
| Man1a         | 1.220 | 1.004 | 0.266 | 0.817 | 0.748 | 1.18E-117 |

|               |       |       |        |       |       |           |
|---------------|-------|-------|--------|-------|-------|-----------|
| Gm37240       | 1.800 | 1.575 | 0.275  | 0.967 | 0.952 | 4.17E-116 |
| Sumf1         | 0.674 | 0.464 | 0.260  | 0.556 | 0.423 | 4.59E-114 |
| AC163354.1    | 1.734 | 1.522 | 0.261  | 0.940 | 0.893 | 1.92E-111 |
| Ankrd6        | 0.879 | 0.278 | 0.651  | 0.344 | 0.244 | 3.02E-109 |
| Hs6st3        | 0.955 | 0.443 | 0.562  | 0.370 | 0.247 | 3.60E-107 |
| Fam117a       | 1.220 | 0.926 | 0.344  | 0.730 | 0.656 | 1.11E-106 |
| Ankrd44       | 0.698 | 0.491 | 0.257  | 0.567 | 0.442 | 7.97E-105 |
| Ttll4         | 1.205 | 0.990 | 0.265  | 0.831 | 0.797 | 3.86E-104 |
| Dlc1          | 1.461 | 0.837 | 0.674  | 0.638 | 0.616 | 2.88E-98  |
| Itifb         | 1.381 | 1.163 | 0.268  | 0.837 | 0.820 | 5.17E-95  |
| Gm45904       | 0.625 | 0.256 | 0.420  | 0.276 | 0.193 | 1.63E-59  |
| Eri3          | 0.824 | 0.546 | 0.328  | 0.528 | 0.450 | 8.04E-57  |
| A930015D03Rik | 1.354 | 0.867 | 0.537  | 0.762 | 0.732 | 2.78E-53  |
| Gria1         | 2.154 | 1.940 | 0.263  | 0.981 | 0.990 | 1.44E-46  |
| Nav2          | 0.507 | 0.299 | 0.259  | 0.328 | 0.257 | 7.18E-41  |
| 4930555F03Rik | 0.518 | 0.182 | 0.387  | 0.170 | 0.107 | 9.65E-41  |
| Ipp           | 0.803 | 0.566 | 0.286  | 0.336 | 0.255 | 1.85E-37  |
| Stxbp5l       | 0.768 | 0.563 | 0.255  | 0.524 | 0.478 | 3.05E-34  |
| Gm30382       | 0.865 | 0.655 | 0.260  | 0.483 | 0.442 | 1.02E-23  |
| 9630028H03Rik | 0.635 | 2.674 | -2.089 | 0.972 | 0.404 | 0.00E+00  |
| Plcb1         | 1.469 | 3.027 | -1.608 | 0.998 | 0.748 | 0.00E+00  |
| Plcb4         | 1.497 | 2.807 | -1.360 | 1.000 | 0.833 | 0.00E+00  |
| Ebf2          | 0.804 | 2.086 | -1.332 | 0.974 | 0.451 | 0.00E+00  |
| Prkca         | 0.814 | 1.938 | -1.174 | 0.985 | 0.542 | 0.00E+00  |
| Gm14211       | 0.565 | 1.670 | -1.155 | 0.938 | 0.415 | 0.00E+00  |
| Etl4          | 2.779 | 3.772 | -1.043 | 1.000 | 0.986 | 0.00E+00  |
| Zfpm2         | 0.665 | 1.621 | -1.005 | 0.947 | 0.423 | 0.00E+00  |
| Sv2c          | 0.578 | 1.518 | -0.990 | 0.879 | 0.361 | 0.00E+00  |
| Pcdh7         | 0.470 | 1.365 | -0.946 | 0.841 | 0.285 | 0.00E+00  |
| Grin2a        | 0.038 | 0.917 | -0.930 | 0.453 | 0.031 | 0.00E+00  |
| 4930438E09Rik | 0.280 | 1.138 | -0.908 | 0.765 | 0.205 | 0.00E+00  |
| Ano3          | 0.343 | 1.188 | -0.895 | 0.814 | 0.233 | 0.00E+00  |
| Lhfp13        | 1.526 | 2.370 | -0.894 | 0.999 | 0.896 | 0.00E+00  |
| Far2          | 1.328 | 2.168 | -0.890 | 0.996 | 0.846 | 0.00E+00  |
| Brinp1        | 0.504 | 1.341 | -0.887 | 0.880 | 0.355 | 0.00E+00  |
| Tmtc2         | 0.802 | 1.636 | -0.884 | 0.913 | 0.532 | 0.00E+00  |
| Rgs8          | 1.116 | 1.901 | -0.835 | 0.990 | 0.712 | 0.00E+00  |
| Gm14033       | 2.013 | 2.778 | -0.815 | 0.998 | 0.881 | 0.00E+00  |
| Lsamp         | 2.837 | 3.586 | -0.799 | 1.000 | 0.958 | 0.00E+00  |
| Rbfox1        | 3.041 | 3.782 | -0.791 | 1.000 | 1.000 | 0.00E+00  |
| Egfem1        | 1.524 | 2.243 | -0.769 | 0.862 | 0.527 | 0.00E+00  |
| Kcnh7         | 1.870 | 2.578 | -0.758 | 1.000 | 0.937 | 0.00E+00  |
| Sgcz          | 2.575 | 3.270 | -0.746 | 1.000 | 0.983 | 0.00E+00  |
| Kctd16        | 0.156 | 0.804 | -0.698 | 0.494 | 0.127 | 0.00E+00  |
| Dgkb          | 1.662 | 2.308 | -0.696 | 0.991 | 0.725 | 0.00E+00  |
| Sphkap        | 1.868 | 2.508 | -0.690 | 0.999 | 0.942 | 0.00E+00  |



|               |       |       |        |       |       |          |
|---------------|-------|-------|--------|-------|-------|----------|
| Trabd2b       | 1.146 | 1.785 | -0.688 | 0.963 | 0.619 | 0.00E+00 |
| Adamts3       | 0.985 | 1.615 | -0.680 | 0.961 | 0.710 | 0.00E+00 |
| Gm17171       | 0.442 | 1.067 | -0.675 | 0.765 | 0.350 | 0.00E+00 |
| Sdk1          | 0.490 | 1.097 | -0.657 | 0.749 | 0.361 | 0.00E+00 |
| Sema3a        | 1.625 | 2.230 | -0.655 | 0.942 | 0.815 | 0.00E+00 |
| Far2os1       | 0.280 | 0.869 | -0.639 | 0.651 | 0.244 | 0.00E+00 |
| Abhd3         | 0.848 | 1.432 | -0.633 | 0.918 | 0.627 | 0.00E+00 |
| Klhl1         | 0.584 | 1.154 | -0.620 | 0.758 | 0.402 | 0.00E+00 |
| Chst8         | 0.487 | 1.049 | -0.612 | 0.786 | 0.346 | 0.00E+00 |
| A330015K06Rik | 2.314 | 2.874 | -0.610 | 0.997 | 0.984 | 0.00E+00 |
| Garnl3        | 3.056 | 3.600 | -0.595 | 1.000 | 0.985 | 0.00E+00 |
| Kcnd2         | 2.166 | 2.706 | -0.590 | 0.998 | 0.942 | 0.00E+00 |
| Ppm1l         | 0.776 | 1.315 | -0.590 | 0.890 | 0.604 | 0.00E+00 |
| Kitl          | 2.004 | 2.529 | -0.574 | 0.999 | 0.977 | 0.00E+00 |
| Kcnp1         | 2.957 | 3.478 | -0.571 | 1.000 | 0.978 | 0.00E+00 |
| 4930545L23Rik | 0.160 | 0.667 | -0.557 | 0.499 | 0.129 | 0.00E+00 |
| 1700109K24Rik | 0.556 | 1.060 | -0.554 | 0.752 | 0.453 | 0.00E+00 |
| Lrrc4c        | 1.691 | 2.186 | -0.545 | 0.970 | 0.840 | 0.00E+00 |
| Efna5         | 1.215 | 1.706 | -0.541 | 0.864 | 0.680 | 0.00E+00 |
| Xylt1         | 0.359 | 0.840 | -0.531 | 0.679 | 0.310 | 0.00E+00 |
| Ntng1         | 0.761 | 1.240 | -0.529 | 0.828 | 0.518 | 0.00E+00 |
| Muc3a         | 0.914 | 1.389 | -0.525 | 0.905 | 0.570 | 0.00E+00 |
| Lingo2        | 2.115 | 2.589 | -0.525 | 0.988 | 0.857 | 0.00E+00 |
| Scn9a         | 0.828 | 1.302 | -0.524 | 0.841 | 0.595 | 0.00E+00 |
| Pard3b        | 0.501 | 0.970 | -0.519 | 0.722 | 0.370 | 0.00E+00 |
| Efr3a         | 1.504 | 1.970 | -0.517 | 0.983 | 0.926 | 0.00E+00 |
| Cntnap2       | 2.925 | 3.386 | -0.511 | 1.000 | 0.978 | 0.00E+00 |
| Samd8         | 0.582 | 1.041 | -0.508 | 0.807 | 0.476 | 0.00E+00 |
| 1700111E14Rik | 1.292 | 1.742 | -0.500 | 0.942 | 0.835 | 0.00E+00 |
| Map2          | 0.791 | 1.234 | -0.493 | 0.884 | 0.602 | 0.00E+00 |
| Cthrc1        | 0.371 | 0.814 | -0.493 | 0.665 | 0.303 | 0.00E+00 |
| Nrg3os        | 0.962 | 1.399 | -0.488 | 0.890 | 0.643 | 0.00E+00 |
| Nrg3          | 2.544 | 2.981 | -0.487 | 1.000 | 0.973 | 0.00E+00 |
| Sgpp2         | 0.268 | 0.702 | -0.483 | 0.582 | 0.230 | 0.00E+00 |
| Cadm2         | 2.467 | 2.889 | -0.472 | 0.999 | 0.911 | 0.00E+00 |
| St8sia5       | 0.531 | 0.952 | -0.471 | 0.782 | 0.448 | 0.00E+00 |
| Gnai1         | 0.827 | 1.238 | -0.461 | 0.853 | 0.580 | 0.00E+00 |
| Col18a1       | 2.225 | 2.635 | -0.461 | 1.000 | 0.996 | 0.00E+00 |
| Frmpd3        | 1.164 | 1.570 | -0.456 | 0.872 | 0.659 | 0.00E+00 |
| Pak7          | 0.526 | 0.925 | -0.449 | 0.705 | 0.416 | 0.00E+00 |
| 4930587E11Rik | 1.441 | 1.835 | -0.443 | 0.888 | 0.719 | 0.00E+00 |
| Gm20642       | 0.932 | 1.314 | -0.432 | 0.883 | 0.657 | 0.00E+00 |
| Paxbp1        | 3.223 | 3.604 | -0.430 | 1.000 | 1.000 | 0.00E+00 |
| Manba         | 0.294 | 0.673 | -0.429 | 0.569 | 0.257 | 0.00E+00 |
| Gm20635       | 1.460 | 1.839 | -0.429 | 0.944 | 0.875 | 0.00E+00 |
| Maml3         | 0.453 | 0.829 | -0.426 | 0.652 | 0.373 | 0.00E+00 |

|          |       |       |        |       |       |          |
|----------|-------|-------|--------|-------|-------|----------|
| Galnt17  | 0.412 | 0.787 | -0.424 | 0.640 | 0.351 | 0.00E+00 |
| Gm44812  | 0.281 | 0.654 | -0.423 | 0.500 | 0.242 | 0.00E+00 |
| Lsmem1   | 0.268 | 0.638 | -0.420 | 0.557 | 0.238 | 0.00E+00 |
| Clic6    | 1.003 | 1.367 | -0.414 | 0.863 | 0.575 | 0.00E+00 |
| Kcnab1   | 2.696 | 3.056 | -0.410 | 1.000 | 0.998 | 0.00E+00 |
| Tiam2    | 0.304 | 0.663 | -0.410 | 0.536 | 0.268 | 0.00E+00 |
| Il1rap1  | 3.108 | 3.467 | -0.409 | 1.000 | 0.999 | 0.00E+00 |
| Ppargc1a | 0.990 | 1.349 | -0.409 | 0.897 | 0.716 | 0.00E+00 |
| Gpc6     | 2.672 | 3.027 | -0.405 | 1.000 | 1.000 | 0.00E+00 |
| Dgki     | 2.314 | 2.661 | -0.396 | 1.000 | 0.998 | 0.00E+00 |
| Mctp1    | 0.575 | 0.921 | -0.396 | 0.694 | 0.435 | 0.00E+00 |
| Gm13629  | 1.075 | 1.420 | -0.394 | 0.905 | 0.742 | 0.00E+00 |
| Kcnj3    | 1.324 | 1.665 | -0.392 | 0.936 | 0.817 | 0.00E+00 |
| Alpk2    | 0.254 | 0.596 | -0.392 | 0.488 | 0.217 | 0.00E+00 |
| Ano5     | 0.157 | 0.493 | -0.386 | 0.380 | 0.122 | 0.00E+00 |
| Pitpnm2  | 0.288 | 0.623 | -0.386 | 0.543 | 0.264 | 0.00E+00 |
| Sptan1   | 2.170 | 2.505 | -0.385 | 0.999 | 0.996 | 0.00E+00 |
| Dnm3     | 1.910 | 2.243 | -0.383 | 0.999 | 0.992 | 0.00E+00 |
| Adcy8    | 0.435 | 0.768 | -0.383 | 0.601 | 0.345 | 0.00E+00 |
| Gm35188  | 3.310 | 3.639 | -0.379 | 1.000 | 0.999 | 0.00E+00 |
| Kcnma1   | 3.780 | 4.108 | -0.377 | 1.000 | 1.000 | 0.00E+00 |
| Lrrtm4   | 2.395 | 2.718 | -0.373 | 0.987 | 0.838 | 0.00E+00 |
| Bicc1    | 0.272 | 0.594 | -0.372 | 0.504 | 0.235 | 0.00E+00 |
| Lpgat1   | 1.302 | 1.624 | -0.372 | 0.960 | 0.865 | 0.00E+00 |
| Pcsk6    | 1.924 | 2.244 | -0.370 | 0.998 | 0.985 | 0.00E+00 |
| Lrp8     | 1.166 | 1.486 | -0.369 | 0.949 | 0.831 | 0.00E+00 |
| Epb41l2  | 0.070 | 0.389 | -0.369 | 0.355 | 0.065 | 0.00E+00 |
| Mbnl2    | 1.767 | 2.081 | -0.364 | 0.998 | 0.986 | 0.00E+00 |
| Gm48163  | 0.131 | 0.444 | -0.363 | 0.375 | 0.115 | 0.00E+00 |
| Ccar1    | 1.718 | 2.030 | -0.362 | 0.994 | 0.971 | 0.00E+00 |
| Dscam    | 1.719 | 2.027 | -0.358 | 0.994 | 0.948 | 0.00E+00 |
| Sorbs2   | 0.563 | 0.866 | -0.353 | 0.646 | 0.371 | 0.00E+00 |
| Esrrb    | 0.210 | 0.512 | -0.352 | 0.444 | 0.183 | 0.00E+00 |
| Agbl4    | 1.479 | 1.781 | -0.352 | 0.973 | 0.876 | 0.00E+00 |
| Kcng4    | 0.075 | 0.373 | -0.348 | 0.350 | 0.070 | 0.00E+00 |
| Icmt     | 0.650 | 0.947 | -0.346 | 0.782 | 0.530 | 0.00E+00 |
| Itga1    | 0.223 | 0.519 | -0.346 | 0.449 | 0.192 | 0.00E+00 |
| Hnrnpm   | 0.843 | 1.137 | -0.344 | 0.868 | 0.687 | 0.00E+00 |
| Sfmbt2   | 0.144 | 0.438 | -0.344 | 0.383 | 0.128 | 0.00E+00 |
| Carmil1  | 0.500 | 0.793 | -0.342 | 0.691 | 0.445 | 0.00E+00 |
| Dgkg     | 2.215 | 2.501 | -0.335 | 1.000 | 0.995 | 0.00E+00 |
| Nrxn3    | 3.880 | 4.164 | -0.334 | 1.000 | 1.000 | 0.00E+00 |
| Nr2f2    | 0.210 | 0.491 | -0.331 | 0.432 | 0.186 | 0.00E+00 |
| Opn3     | 0.125 | 0.407 | -0.331 | 0.341 | 0.109 | 0.00E+00 |
| Grip1    | 2.826 | 3.105 | -0.329 | 1.000 | 1.000 | 0.00E+00 |
| Pde9a    | 1.540 | 1.819 | -0.329 | 0.982 | 0.912 | 0.00E+00 |

|               |       |       |        |       |       |           |
|---------------|-------|-------|--------|-------|-------|-----------|
| Ccdc172       | 0.055 | 0.333 | -0.328 | 0.232 | 0.042 | 0.00E+00  |
| Arap2         | 1.714 | 1.983 | -0.319 | 0.992 | 0.977 | 0.00E+00  |
| Cadps         | 2.394 | 2.662 | -0.318 | 1.000 | 1.000 | 0.00E+00  |
| Pcdh9         | 3.976 | 4.244 | -0.317 | 1.000 | 1.000 | 0.00E+00  |
| Rbfox2        | 1.536 | 1.800 | -0.314 | 0.988 | 0.954 | 0.00E+00  |
| Pard3bos1     | 0.105 | 0.368 | -0.313 | 0.296 | 0.087 | 0.00E+00  |
| Cacna2d2      | 1.754 | 2.011 | -0.306 | 0.996 | 0.983 | 0.00E+00  |
| Fam135b       | 1.745 | 2.002 | -0.306 | 0.993 | 0.978 | 0.00E+00  |
| Galnt13       | 2.407 | 2.657 | -0.300 | 1.000 | 1.000 | 0.00E+00  |
| Dab1          | 3.745 | 3.990 | -0.295 | 1.000 | 1.000 | 0.00E+00  |
| Fgf12         | 2.576 | 2.818 | -0.292 | 1.000 | 1.000 | 0.00E+00  |
| Gm6878        | 0.042 | 0.282 | -0.290 | 0.255 | 0.038 | 0.00E+00  |
| Gm13362       | 0.106 | 0.346 | -0.289 | 0.307 | 0.096 | 0.00E+00  |
| Gm28410       | 0.078 | 0.302 | -0.274 | 0.270 | 0.071 | 0.00E+00  |
| Dpp10         | 3.836 | 4.057 | -0.272 | 1.000 | 1.000 | 0.00E+00  |
| Car8          | 3.386 | 3.601 | -0.265 | 1.000 | 1.000 | 0.00E+00  |
| Gm1           | 3.625 | 3.833 | -0.258 | 1.000 | 1.000 | 0.00E+00  |
| Elovl5        | 0.383 | 0.689 | -0.356 | 0.579 | 0.343 | 1.91E-300 |
| Diaph2        | 0.931 | 1.242 | -0.361 | 0.866 | 0.679 | 1.77E-298 |
| Rgs7bp        | 1.888 | 2.132 | -0.294 | 0.996 | 0.982 | 9.87E-294 |
| 4930567K20Rik | 2.072 | 2.373 | -0.351 | 0.989 | 0.967 | 1.66E-293 |
| Casq2         | 1.427 | 1.695 | -0.319 | 0.970 | 0.917 | 9.63E-288 |
| Gm3294        | 0.201 | 0.455 | -0.303 | 0.416 | 0.186 | 6.85E-287 |
| 4930428E07Rik | 0.132 | 0.389 | -0.307 | 0.322 | 0.113 | 2.46E-286 |
| Gm26936       | 0.635 | 0.957 | -0.372 | 0.729 | 0.518 | 1.66E-283 |
| Stim1         | 1.490 | 1.753 | -0.313 | 0.973 | 0.928 | 1.43E-281 |
| Nptn          | 1.821 | 2.043 | -0.271 | 0.996 | 0.988 | 4.16E-279 |
| Gm13417       | 0.229 | 0.508 | -0.329 | 0.422 | 0.198 | 5.73E-273 |
| Cds1          | 0.668 | 0.933 | -0.314 | 0.776 | 0.575 | 1.30E-269 |
| Kcna1         | 0.739 | 1.011 | -0.322 | 0.813 | 0.627 | 3.17E-268 |
| Gm29114       | 0.310 | 0.592 | -0.331 | 0.503 | 0.277 | 1.57E-265 |
| Stmn4         | 0.226 | 0.467 | -0.291 | 0.426 | 0.203 | 2.04E-263 |
| Ano4          | 1.283 | 1.546 | -0.313 | 0.946 | 0.846 | 3.86E-263 |
| Sorbs2os      | 0.374 | 0.670 | -0.346 | 0.495 | 0.262 | 8.71E-263 |
| Grip1os2      | 0.693 | 0.995 | -0.352 | 0.751 | 0.553 | 5.44E-258 |
| Igf1          | 0.385 | 0.677 | -0.342 | 0.547 | 0.325 | 4.27E-256 |
| Gabrb2        | 1.865 | 2.089 | -0.274 | 0.995 | 0.984 | 1.45E-254 |
| Scin          | 0.098 | 0.303 | -0.255 | 0.277 | 0.091 | 6.36E-254 |
| Wdr17         | 2.111 | 2.421 | -0.360 | 0.988 | 0.964 | 4.21E-253 |
| Fign          | 0.568 | 0.855 | -0.337 | 0.671 | 0.448 | 9.32E-251 |
| Rapgef5       | 0.532 | 0.795 | -0.314 | 0.676 | 0.459 | 5.99E-250 |
| Fat3          | 0.491 | 0.770 | -0.329 | 0.621 | 0.390 | 1.71E-249 |
| Rab31         | 0.601 | 0.856 | -0.305 | 0.700 | 0.480 | 1.95E-248 |
| Plppr5        | 0.745 | 1.012 | -0.318 | 0.772 | 0.553 | 1.01E-246 |
| Kcnmb1        | 0.342 | 0.598 | -0.306 | 0.531 | 0.312 | 1.45E-241 |
| Gm28750       | 0.118 | 0.340 | -0.272 | 0.287 | 0.103 | 3.79E-240 |

|               |       |       |        |       |       |           |
|---------------|-------|-------|--------|-------|-------|-----------|
| Rreb1         | 1.703 | 1.922 | -0.269 | 0.990 | 0.973 | 1.47E-238 |
| Cntn3         | 2.698 | 2.911 | -0.263 | 1.000 | 0.990 | 6.85E-237 |
| Gm26531       | 0.857 | 1.176 | -0.369 | 0.799 | 0.638 | 7.67E-234 |
| Gm44532       | 0.151 | 0.365 | -0.265 | 0.334 | 0.140 | 9.73E-234 |
| Fras1         | 0.829 | 1.086 | -0.307 | 0.827 | 0.638 | 3.18E-232 |
| Pih1h3b       | 0.566 | 0.838 | -0.323 | 0.612 | 0.383 | 1.05E-230 |
| Svil          | 1.404 | 1.642 | -0.288 | 0.966 | 0.914 | 6.53E-228 |
| Cyth3         | 1.251 | 1.505 | -0.304 | 0.934 | 0.833 | 4.95E-226 |
| Calm2         | 1.896 | 2.105 | -0.259 | 0.996 | 0.984 | 3.02E-224 |
| Ghr           | 0.562 | 0.821 | -0.309 | 0.668 | 0.454 | 2.35E-222 |
| Ikzf2         | 0.702 | 0.954 | -0.303 | 0.762 | 0.569 | 2.86E-222 |
| Gm20319       | 0.508 | 0.774 | -0.316 | 0.625 | 0.416 | 1.06E-221 |
| Ehbp1         | 0.962 | 1.218 | -0.306 | 0.882 | 0.752 | 1.37E-219 |
| Gm21798       | 0.265 | 0.546 | -0.331 | 0.397 | 0.197 | 1.65E-219 |
| Tmem64        | 0.246 | 0.484 | -0.289 | 0.419 | 0.219 | 8.86E-218 |
| Gab2          | 0.667 | 0.930 | -0.313 | 0.717 | 0.517 | 2.32E-216 |
| Gm12353       | 1.169 | 1.452 | -0.333 | 0.901 | 0.793 | 2.55E-216 |
| Lrp8os2       | 0.391 | 0.644 | -0.303 | 0.550 | 0.348 | 4.64E-214 |
| Sema7a        | 0.165 | 0.372 | -0.257 | 0.344 | 0.157 | 4.77E-212 |
| Gm13944       | 1.395 | 1.647 | -0.301 | 0.953 | 0.874 | 1.09E-209 |
| Gm38304       | 0.571 | 0.828 | -0.307 | 0.677 | 0.483 | 2.04E-208 |
| Dock2         | 0.169 | 0.385 | -0.266 | 0.338 | 0.156 | 8.00E-206 |
| March3        | 0.348 | 0.593 | -0.296 | 0.500 | 0.300 | 5.75E-205 |
| Cdh13         | 0.114 | 0.314 | -0.250 | 0.269 | 0.103 | 6.92E-205 |
| Zfp385b       | 2.261 | 2.478 | -0.267 | 0.998 | 0.996 | 3.56E-204 |
| Flnb          | 1.104 | 1.340 | -0.286 | 0.920 | 0.816 | 1.88E-202 |
| Il1rap        | 1.325 | 1.548 | -0.273 | 0.958 | 0.890 | 2.31E-201 |
| Etfa          | 0.863 | 1.103 | -0.290 | 0.835 | 0.687 | 7.85E-195 |
| Sufu          | 0.362 | 0.591 | -0.279 | 0.516 | 0.320 | 1.80E-194 |
| Cul4b         | 1.695 | 1.949 | -0.304 | 0.930 | 0.824 | 1.58E-193 |
| Cntnap5a      | 1.708 | 1.988 | -0.330 | 0.944 | 0.865 | 1.31E-192 |
| Zfp536        | 0.330 | 0.548 | -0.268 | 0.475 | 0.283 | 7.45E-185 |
| B3glct        | 0.730 | 0.943 | -0.264 | 0.773 | 0.579 | 1.55E-184 |
| Plekha5       | 0.831 | 1.055 | -0.274 | 0.825 | 0.660 | 1.16E-182 |
| Gm48421       | 0.110 | 0.368 | -0.309 | 0.216 | 0.073 | 3.24E-182 |
| Tmem255a      | 0.624 | 0.857 | -0.283 | 0.702 | 0.521 | 1.08E-181 |
| Gm44071       | 1.921 | 2.124 | -0.253 | 0.987 | 0.980 | 1.94E-180 |
| Smarca1       | 0.432 | 0.698 | -0.316 | 0.542 | 0.362 | 8.66E-180 |
| Gm15046       | 0.764 | 0.990 | -0.275 | 0.723 | 0.516 | 1.36E-175 |
| Xrcc6         | 1.102 | 1.349 | -0.298 | 0.889 | 0.785 | 7.64E-174 |
| 4930445B16Rik | 0.188 | 0.417 | -0.280 | 0.304 | 0.140 | 1.03E-173 |
| Phactr1       | 0.514 | 0.740 | -0.276 | 0.594 | 0.402 | 8.89E-171 |
| Bcan          | 0.362 | 0.565 | -0.253 | 0.520 | 0.339 | 3.15E-165 |
| 4930567K12Rik | 1.055 | 1.300 | -0.295 | 0.865 | 0.748 | 9.46E-158 |
| Agfg1         | 0.979 | 1.182 | -0.254 | 0.874 | 0.748 | 2.62E-155 |
| Lpp           | 0.947 | 1.150 | -0.253 | 0.854 | 0.717 | 3.26E-155 |

|               |       |       |        |       |       |           |
|---------------|-------|-------|--------|-------|-------|-----------|
| Gm15083       | 0.710 | 0.950 | -0.290 | 0.699 | 0.532 | 1.88E-153 |
| Ncam2         | 1.718 | 1.927 | -0.260 | 0.961 | 0.863 | 2.02E-152 |
| 3300002A11Rik | 0.545 | 0.916 | -0.422 | 0.395 | 0.230 | 4.80E-152 |
| Mfhas1        | 1.230 | 1.435 | -0.255 | 0.928 | 0.857 | 3.91E-151 |
| Snrpn         | 0.376 | 0.593 | -0.267 | 0.475 | 0.303 | 3.29E-148 |
| 1700080N15Rik | 0.778 | 0.987 | -0.259 | 0.769 | 0.618 | 2.65E-143 |
| Efcab14       | 0.431 | 0.660 | -0.279 | 0.534 | 0.379 | 6.09E-141 |
| Gm30313       | 1.067 | 1.270 | -0.253 | 0.884 | 0.784 | 1.33E-140 |
| Esrrg         | 0.630 | 0.837 | -0.257 | 0.664 | 0.496 | 4.97E-139 |
| 1110019D14Rik | 0.682 | 0.922 | -0.290 | 0.661 | 0.499 | 1.01E-136 |
| Cmya5         | 0.570 | 0.774 | -0.255 | 0.630 | 0.462 | 4.96E-136 |
| Pcsk1         | 0.382 | 0.600 | -0.268 | 0.438 | 0.271 | 9.68E-134 |
| March4        | 0.575 | 0.778 | -0.253 | 0.632 | 0.468 | 1.88E-132 |
| Ints6         | 1.020 | 1.258 | -0.288 | 0.852 | 0.742 | 3.35E-132 |
| Eif2ak3       | 0.397 | 0.692 | -0.345 | 0.460 | 0.311 | 5.50E-132 |
| Gm26713       | 1.982 | 2.208 | -0.276 | 0.956 | 0.937 | 1.51E-110 |
| Nxph1         | 0.148 | 0.396 | -0.298 | 0.213 | 0.104 | 1.34E-104 |
| Cdh8          | 0.357 | 0.572 | -0.265 | 0.310 | 0.213 | 2.81E-63  |

**Supplementary Table 4.**  
**Module significant genes**

| <b>Blue</b> | <b>Brown</b> | <b>Black</b> | <b>Red</b> | <b>Yellow</b> | <b>Green</b> | <b>Turquoise</b> |
|-------------|--------------|--------------|------------|---------------|--------------|------------------|
| Abhd15      | Arglu1       | Alkbh1       | Arl15      | Ablim2        | Abhd3        | Ablim1           |
| Arhgap20os  | Atp1b1       | Arl3         | Cacna1d    | Abr           | Adamts3      | Adam23           |
| Aste1       | Atp5a1       | Atp2c1       | Clstn2     | Apba1         | Calm2        | Adgrl2           |
| Atp5o       | Atp6ap2      | Birc2        | Cntn4      | Arhgef37      | Ccar1        | Aff3             |
| B3galt2     | Atp6v0b      | Cnot3        | Cntn5      | Astn1         | Cck          | Agap1            |
| Brip1os     | AY036118     | Dalrd3       | Col4a1     | Bcl11a        | Cyth3        | Akt3             |
| Cd180       | BC031181     | Dnajc3       | Col4a5     | Cpne8         | Dgkb         | Ank1             |
| Creb3l2     | Brd9         | Errfil       | Corin      | Dach1         | Egfm1        | Ankrd17          |
| Dnajc19     | Bsg          | Etv5         | Dgkh       | Dym           | Emc7         | Arfgef3          |
| Drg1        | C1qtnf4      | Fam117a      | Dpp6       | Dync1i1       | Enah         | Arhgap32         |
| Echdc1      | Ccdc107      | Fcor         | Ebf2       | Edil3         | Etl4         | Arhgef33         |
| Far1os      | Ccdc107      | Fos          | Erc2       | Eil2          | Garnl3       | Arid1b           |
| Fbn1        | Cd81         | Gabarapl2    | Far2os1    | Elmo1         | Ints6        | Arid5b           |
| Fgfr2       | Ckb          | Hsp90b1      | Fndc3b     | Fam107b       | Kcnip1       | Atp2a2           |
| Flrt3       | Cmss1        | Hspa8        | Fstl4      | Fam155a       | Kcnj3        | Atp2b2           |
| Fndc9       | Cox7b        | Hsph1        | Grb14      | Frmd5         | Kitl         | Atp8a2           |
| Frmpd3      | Cox7c        | Hunk         | Hs6st3     | Gabbr2        | Klhl1        | Atrnl1           |
| Ggact       | Crebzf       | Ipo5         | Itga6      | Gfod1         | Lingo2       | B3galnt2         |
| Grip1os2    | Cst3         | Lgr5         | Ldlrad4    | Gm20635       | Lonrf3       | B4galnt3         |
| Grm3        | Dnaja2       | Lin28b       | Mpped2     | Gnao1         | Lsamp        | Bcas3            |
| Grm5        | Erg28        | Mapre2       | Nrxn1      | Gnaq          | Ncam2        | Btbd9            |
| Igf2bp3     | Erp29        | Mpzl1        | Ntrk3      | Gng13         | Nrg3         | C78859           |
| Igf2r       | Fam173a      | Pcsk1        | Ppp2r2b    | Gria1         | Pbx3         | Cacnb4           |
| Itgbl1      | Fam69b       | Pde10a       | Ptpn       | Grik1         | Pcdh7        | Camta1           |
| Kansl1l     | Gde1         | Pdia3        | Rgs7       | Hdac9         | Pde9a        | Ccdc85a          |
| Kcnq1       | H2-D1        | Prickle1     | Rora       | Herc1         | Plcb4        | Cdkal1           |
| Leng9       | Hnrnp3       | Ptpn1        | Rps6ka5    | Ift57         | Plppr5       | Clasp1           |
| Loxl2       | Hspa5        | Rhobtb2      | Slc1a6     | Il22          | Prkca        | Clec16a          |
| Lrp8os2     | Il1f1b       | Ring1        | Slc24a2    | Intu          | Rgs8         | Clnn             |
| Lrrc4       | Itm2b        | Sel1l        | Slc8a1     | Kcnq1ot1      | Sdk1         | Cnksr2           |
| Lysmd4      | Lamp1        | Serinc2      | Sorcs2     | Mast4         | Sema3a       | Cntnap5a         |
| MacroD2os1  | Lrpap1       | Slc38a2      | Synpo2     | Nbea          | Slc31a2      | Coro2b           |
| Mad1l1      | Lsm7         | St13         | Tenm1      | Nell1         | Snrpn        | Cpeb1            |
| Malat1      | Lynx1        | Stx18        | Tenm2      | Nwd2          | Sphkap       | Cpeb4            |
| Nell1os     | Manf         | Taf1d        | Tmeff2     | Pdzrn3        | Sv2c         | Cul4b            |
| Nme7        | Mettl23      | Tanc1        | Tmem132c   | Phactr2       | Tiam2        | Dab1             |
| Nr6a1os     | Mif2         | Tex261       | Unc5d      | Pitpm3        | Tm2d1        | Dagla            |
| Nrg3os      | Mrps10       | Usp29        |            | Ppm1b         | Tmem132cos   | Ddx17            |
| Nrk         | Nap1l5       | Wls          |            | Prmt8         | Tmtc2        | Dgke             |
| Nudt5       | Ndufaf4      | Wnk3         |            | Sez6l         | Trabd2b      | Dgkg             |

|          |          |  |  |         |        |         |
|----------|----------|--|--|---------|--------|---------|
| P2ry12   | Nkain2   |  |  | Trim9   | Trim35 | Dgki    |
| P2ry14   | Nsg1     |  |  | Tspan5  | Zfpm2  | Dgkz    |
| Pet100   | Pcp2     |  |  | Ubash3b |        | Dnm1    |
| Pih1h3b  | Pcp4     |  |  | Unc5c   |        | Dock9   |
| Ptprd    | Pcsk1n   |  |  | Usp15   |        | Ehbp1   |
| Rsf1os1  | Pebp1    |  |  | Usp24   |        | Eml5    |
| Scn9a    | Pla2g3   |  |  | Vav3    |        | Epb41l3 |
| Slc24a5  | Ppib     |  |  | Zfp804a |        | Fam214a |
| Sos1     | Ppp1r14b |  |  |         |        | Fbxl17  |
| Sox5os2  | Preli3a  |  |  |         |        | Fgd3    |
| Sox5os4  | Prpf4b   |  |  |         |        | Flnb    |
| Strbp    | Psmc6    |  |  |         |        | Fmn2    |
| Sycp2    | Rnf25    |  |  |         |        | Fras1   |
| Tifa     | Rpl6     |  |  |         |        | Fryl    |
| Tmem126a | Rtn4     |  |  |         |        | Fto     |
| Tmem243  | Scn1b    |  |  |         |        | Gabrb1  |
| Ube3a    | Selenok  |  |  |         |        | Gabrb2  |
| Usp50    | Selenom  |  |  |         |        | Gpm6a   |
| Wdr17    | Selenos  |  |  |         |        | Grik4   |
| Xlr5a    | Serf2    |  |  |         |        | Grip1   |
| Xrcc6    | Sltm     |  |  |         |        | Grm1    |
|          | Snhg11   |  |  |         |        | Gtdc1   |
|          | Snhg20   |  |  |         |        | Hpcal1  |
|          | Snw1     |  |  |         |        | Ide     |
|          | Spag5    |  |  |         |        | Igf1r   |
|          | Srrm2    |  |  |         |        | Inpp5a  |
|          | Srsf11   |  |  |         |        | Itpr1   |
|          | Srsf2    |  |  |         |        | Kalrn   |
|          | Srsf7    |  |  |         |        | Kcnab1  |
|          | Ssbp4    |  |  |         |        | Kcnd3   |
|          | Ssc4d    |  |  |         |        | Kcnma1  |
|          | Tecr     |  |  |         |        | Kif1a   |
|          | Timmdc1  |  |  |         |        | Ldlrad3 |
|          | Tmem191c |  |  |         |        | Lrba    |
|          | Tspan2   |  |  |         |        | Lrrfip1 |
|          | Zc3h15   |  |  |         |        | Mapk10  |
|          | Zcchc18  |  |  |         |        | Med12l  |
|          |          |  |  |         |        | Mid1    |
|          |          |  |  |         |        | Mpdz    |
|          |          |  |  |         |        | Msi2    |
|          |          |  |  |         |        | Mtcl1   |
|          |          |  |  |         |        | Mtss1   |

|  |  |  |  |  |  |          |
|--|--|--|--|--|--|----------|
|  |  |  |  |  |  | Mtus2    |
|  |  |  |  |  |  | Myh10    |
|  |  |  |  |  |  | Ncoa2    |
|  |  |  |  |  |  | Nell2    |
|  |  |  |  |  |  | Nfasc    |
|  |  |  |  |  |  | Nr3c2    |
|  |  |  |  |  |  | Nup93    |
|  |  |  |  |  |  | Nxpe4    |
|  |  |  |  |  |  | Pbx1     |
|  |  |  |  |  |  | Pde5a    |
|  |  |  |  |  |  | Pfkip    |
|  |  |  |  |  |  | Plekha5  |
|  |  |  |  |  |  | Plxdc1   |
|  |  |  |  |  |  | Ppp1r12b |
|  |  |  |  |  |  | Psd2     |
|  |  |  |  |  |  | Psd3     |
|  |  |  |  |  |  | Ptpn13   |
|  |  |  |  |  |  | Ptprm    |
|  |  |  |  |  |  | Ralgapa2 |
|  |  |  |  |  |  | Ralgps1  |
|  |  |  |  |  |  | Rasal2   |
|  |  |  |  |  |  | Rbfox2   |
|  |  |  |  |  |  | Rbms1    |
|  |  |  |  |  |  | Rbms3    |
|  |  |  |  |  |  | Reps1    |
|  |  |  |  |  |  | Rgs7bp   |
|  |  |  |  |  |  | Rictor   |
|  |  |  |  |  |  | Robo2    |
|  |  |  |  |  |  | Rps6kc1  |
|  |  |  |  |  |  | Sestd1   |
|  |  |  |  |  |  | Shank2   |
|  |  |  |  |  |  | Shc4     |
|  |  |  |  |  |  | Slc35f1  |
|  |  |  |  |  |  | Sorl1    |
|  |  |  |  |  |  | Sox5     |
|  |  |  |  |  |  | Srgap1   |
|  |  |  |  |  |  | Srrm3    |
|  |  |  |  |  |  | Stac     |
|  |  |  |  |  |  | Stim1    |
|  |  |  |  |  |  | Strip2   |
|  |  |  |  |  |  | Susd4    |
|  |  |  |  |  |  | Syne1    |



|  |  |  |  |  |  |          |
|--|--|--|--|--|--|----------|
|  |  |  |  |  |  | Syt14    |
|  |  |  |  |  |  | Tln2     |
|  |  |  |  |  |  | Tmem132d |
|  |  |  |  |  |  | Tmem178b |
|  |  |  |  |  |  | Tmem267  |
|  |  |  |  |  |  | Tmtc1    |
|  |  |  |  |  |  | Tnik     |
|  |  |  |  |  |  | Trio     |
|  |  |  |  |  |  | Tspan11  |
|  |  |  |  |  |  | Ttc7b    |
|  |  |  |  |  |  | Ttl5     |
|  |  |  |  |  |  | Tr       |
|  |  |  |  |  |  | Unc79    |
|  |  |  |  |  |  | Vps41    |
|  |  |  |  |  |  | Washc2   |
|  |  |  |  |  |  | Wwox     |
|  |  |  |  |  |  | Zfand4   |
|  |  |  |  |  |  | Zfp407   |
|  |  |  |  |  |  | Zzef1    |

**Supplementary Table 5.****Sequences of primer sets used in genomic DNA PCR**

| <b>Gene</b>        | <b>Forward primer</b>  | <b>Reverse primer</b>   |
|--------------------|------------------------|-------------------------|
| <i>Fgfr2</i>       | AGAAGAAGTGTGCAGATGGGA  | AGGCCTCCCACTTAAAGACC    |
| <i>gRNA1-off 1</i> | GGAAAGACAGGGACAGGAGGC  | CCCTGGTCTTACTCAGTGGG    |
| <i>gRNA1-off 2</i> | GCTCTGTTTCAGAAGAGGGGTG | GATGATTCTAGCTTGTGTCAAG  |
| <i>gRNA1-off 3</i> | TGGGCTGCATAGTGTAGCTGG  | GAGCTCGTCGAGTTCTTCCAA   |
| <i>gRNA1-off 4</i> | AGACATAACACCATACCCCTGA | GGCCTGTACTTACTGCATCAG   |
| <i>gRNA1-off 5</i> | GCGTTTTCTAGTCAGCCAAAGG | GTAGAAAGACAGCTAGTGTTCCG |
| <i>gRNA2-off 1</i> | GCCAGAGGGGTCCTCATTTAC  | AGAGTTCTGTAGCACCTCCGT   |
| <i>gRNA2-off 2</i> | TGGGAATCCGTTAGGTTGGC   | AGATGGGTACATGGGGGAGC    |
| <i>gRNA2-off 3</i> | AAGCCAATGCTGGGCTACTC   | TCCTCAAGCTTTCATGGCTG    |
| <i>gRNA2-off 4</i> | AAACCATTTGCTTCATTCGTGC | CCAGCGGGCTGTACTTTAACT   |
| <i>gRNA2-off 5</i> | TCTTGCGCAATGCTTGCTAAC  | TTACAGAGTACCAAAGCCCC    |

**Supplementary Table 6.**  
**Sequences of primer sets used in qPCR**

| <b>Gene</b>  | <b>Forward primer</b> | <b>Reverse primer</b> |
|--------------|-----------------------|-----------------------|
| <i>Gapdh</i> | GGGTGTGAACCACGAGAAATA | CTGTGGTCATGAGCCCTTC   |
| <i>Fos</i>   | GGGAGGACCTTACCTGTTCCG | AGGCCAGATGTGGATGCTT   |
| <i>FosB</i>  | CGAGAAGAGACACTTACCCCA | GTTTCCGCCTGAAGTCGATCT |
| <i>Npas4</i> | AGGGTTTGCTGATGAGTTGC  | CCCCTCCACTTCCATCTTC   |

### **Supplementary Video.**

**Associative learning.** Startle response was induced by tactile stimulation of the nose of a head-fixed mouse on a treadmill. Backward locomotion was induced within 20 ms of triggering the tactile stimulus. When a light-emitting diode (LED) used as the conditioned stimulus (CS) was repeatedly paired with the tactile stimulus as the unconditioned stimulus (US), animals learned to move backward in response to the LED cue over several days of training. Naïve mice failed to move backward before the US.
